# Supplementary material for: Mining anion–aromatic interactions in the Protein Data Bank
Source: Chem Sci. 2022 Mar 1;13(14):3984–98. doi: 10.1039/d2sc00763k (PMC8985504; doi:10.1039/d2sc00763k)
Supplement: SC-013-D2SC00763K-s001 [file SC-013-D2SC00763K-s001.xlsx]

## Sheet: cationFreq
i									ii									iii									iv
A			B			C			A			B			C			A			B			C			A			B			C
element	counts	%	element	counts	%	element	counts	%	element	counts	%	element	counts	%	element	counts	%	element	counts	%	element	counts	%	element	counts	%	element	counts	%	element	counts	%	element	counts	%
ZN	110	19.3662	MG	430	20.5447	ZN	1148	23.6311	ZN	113	49.5614	ZN	800	44.2723	ZN	3498	53.5272	N(ARG)	1154	71.2346	N(ARG)	3493	73.4904	N(ARG)	28222	72.6173	ZN	304	34.5455	ZN	595	39.6667	ZN	1910	38.7896
MG	99	17.4296	FE	398	19.0158	FE	1024	21.0786	FE	39	17.1053	FE	289	15.9934	FE	931	14.2464	N(LYS)	449	27.716	N(LYS)	1211	25.4786	N(LYS)	9814	25.2522	MG	210	23.8636	MG	221	14.7333	MG	663	13.4647
MN	88	15.493	ZN	371	17.7258	MG	853	17.5587	MN	21	9.21053	MN	210	11.6215	MN	810	12.3948	MG	5	0.308642	MG	15	0.31559	FE	440	1.13215	FE	125	14.2045	FE	179	11.9333	FE	650	13.2006
CA	84	14.7887	CA	256	12.2312	MN	491	10.107	MG	21	9.21053	MG	152	8.41173	NI	275	4.20811	ZN	3	0.185185	FE	8	0.168315	MG	123	0.316488	MN	54	6.13636	CA	101	6.73333	MN	385	7.81885
FE	80	14.0845	MN	234	11.1801	CA	472	9.71593	NI	9	3.94737	CU	60	3.32042	CU	235	3.59602	MO	2	0.123457	ZN	7	0.147275	ZN	74	0.190408	NA	30	3.40909	CU	74	4.93333	CU	370	7.51422
NA	41	7.21831	NA	106	5.0645	NA	272	5.59901	CU	6	2.63158	CO	57	3.1544	CO	216	3.30528	CA	2	0.123457	NA	7	0.147275	NA	55	0.141519	CO	28	3.18182	MN	68	4.53333	CA	190	3.85865
CD	15	2.64085	CU	50	2.38892	CD	94	1.93495	CA	6	2.63158	NI	56	3.09906	CD	199	3.04514	MN	1	0.0617284	HG	4	0.0841574	MN	39	0.10035	NI	27	3.06818	NA	63	4.2	NA	173	3.5134
NI	12	2.11268	NI	46	2.1978	CO	88	1.81145	CD	4	1.75439	CD	45	2.49032	MG	180	2.7544	K	1	0.0617284	NI	2	0.0420787	CA	23	0.0591807	CA	25	2.84091	NI	52	3.46667	NI	167	3.39155
K	11	1.93662	CO	35	1.67224	K	86	1.77028	NA	2	0.877193	EU	30	1.66021	CA	64	0.979342	HG	1	0.0617284	CD	2	0.0420787	CU	22	0.0566077	CD	16	1.81818	CO	49	3.26667	CD	104	2.1121
AU	4	0.704225	CD	33	1.57668	NI	79	1.62618	TB	1	0.438596	CA	28	1.54953	MO	21	0.321347	FE	1	0.0617284	W	1	0.0210393	K	12	0.0308769	CU	16	1.81818	K	22	1.46667	CO	100	2.03087
CO	4	0.704225	MO	27	1.29001	MO	56	1.15274	RU	1	0.438596	PT	19	1.05147	NA	18	0.27544	CD	1	0.0617284	PT	1	0.0210393	NI	11	0.0283038	RU	11	1.25	CD	17	1.13333	K	60	1.21852
GD	3	0.528169	K	23	1.0989	CU	46	0.946892	PT	1	0.438596	TB	10	0.553403	PT	13	0.198929	SUM	1620	100	K	1	0.0210393	HG	7	0.0180115	K	11	1.25	RU	9	0.6	W	33	0.670187
LI	3	0.528169	HG	10	0.477783	BE	28	0.576369	MO	1	0.438596	NA	9	0.498063	V	11	0.168324				CA	1	0.0210393	CS	4	0.0102923	SR	6	0.681818	SR	8	0.533333	SR	26	0.528026
HG	2	0.352113	GD	6	0.28667	AL	17	0.349938	IR	1	0.438596	MO	8	0.442723	AL	8	0.122418				SUM	4753	100	CD	4	0.0102923	HG	3	0.340909	HG	7	0.466667	MO	21	0.426483
CU	2	0.352113	U	5	0.238892	TB	16	0.329354	HG	1	0.438596	RU	5	0.276702	HG	7	0.107116							CO	3	0.00771923	MO	2	0.227273	BA	6	0.4	HG	18	0.365556
SR	1	0.176056	BA	5	0.238892	V	10	0.205846	CO	1	0.438596	LU	4	0.221361	K	7	0.107116							PT	2	0.00514615	PT	2	0.227273	MO	6	0.4	RU	10	0.203087
Y	1	0.176056	Y	5	0.238892	AU	7	0.144092	SUM	228	100	HG	4	0.221361	RU	6	0.0918133							SR	2	0.00514615	TB	2	0.227273	PT	5	0.333333	PT	9	0.182778
MO	1	0.176056	AU	5	0.238892	SR	7	0.144092				V	3	0.166021	RH	6	0.0918133							V	2	0.00514615	BA	2	0.227273	EU	4	0.266667	V	6	0.121852
OS	1	0.176056	CS	4	0.191113	HG	7	0.144092				K	3	0.166021	AG	5	0.0765111							PD	1	0.00257308	LI	1	0.113636	OS	3	0.2	BA	5	0.101543
EU	1	0.176056	TB	4	0.191113	PT	6	0.123508				IR	3	0.166021	TB	5	0.0765111							TE	1	0.00257308	Y	1	0.113636	AU	1	0.0666667	AG	5	0.101543
RB	1	0.176056	PR	3	0.143335	TA	6	0.123508				AL	2	0.110681	IR	4	0.0612089							TL	1	0.00257308	OS	1	0.113636	CE	1	0.0666667	PD	5	0.101543
RU	1	0.176056	PB	3	0.143335	EU	5	0.102923				PR	2	0.110681	BE	4	0.0612089							U	1	0.00257308	RE	1	0.113636	V	1	0.0666667	AU	4	0.0812348
SM	1	0.176056	PT	3	0.143335	LI	5	0.102923				LA	1	0.0553403	SM	3	0.0459067							AU	1	0.00257308	TL	1	0.113636	LI	1	0.0666667	RB	2	0.0406174
BA	1	0.176056	RU	3	0.143335	U	5	0.102923				PD	1	0.0553403	LI	2	0.0306044							SUM	38864	100	V	1	0.113636	CS	1	0.0666667	AL	2	0.0406174
U	1	0.176056	BE	3	0.143335	RE	5	0.102923				CE	1	0.0553403	IN	1	0.0153022										SUM	880	100	TE	1	0.0666667	EU	1	0.0203087
SUM	568	100	SR	3	0.143335	Y	4	0.0823384				SR	1	0.0553403	EU	1	0.0153022													YB	1	0.0666667	TL	1	0.0203087
			EU	3	0.143335	LA	3	0.0617538				TA	1	0.0553403	OS	1	0.0153022													PB	1	0.0666667	CS	1	0.0203087
			LI	2	0.0955566	PB	3	0.0617538				BA	1	0.0553403	RE	1	0.0153022													PD	1	0.0666667	OS	1	0.0203087
			HO	2	0.0955566	PR	3	0.0617538				AU	1	0.0553403	TA	1	0.0153022													RE	1	0.0666667	BE	1	0.0203087
			LA	2	0.0955566	BA	3	0.0617538				LI	1	0.0553403	BA	1	0.0153022													AG	1	0.0666667	RH	1	0.0203087
			LU	2	0.0955566	IR	2	0.0411692				SUM	1807	100	AU	1	0.0153022													SUM	1500	100	SUM	4924	100
			RE	2	0.0955566	BI	2	0.0411692							SUM	6535	100
			SM	2	0.0955566	RU	2	0.0411692
			TE	2	0.0955566	SM	2	0.0411692
			IN	1	0.0477783	TL	1	0.0205846
			YB	1	0.0477783	SUM	4858	100
			CE	1	0.0477783
			SN	1	0.0477783
			W	1	0.0477783
			SUM	2093	100

## Sheet: anionFreq
i									ii									iii									iv									v									vi
A			B			C			A			B			C			A			B			C			A			B			C			A			B			C			A			B
Anion	Counts	%	Anion	Counts	%	Anion	Counts	%	Anion	Counts	%	Anion	Counts	%	Anion	Counts	%	Anion	Counts	%	Anion	Counts	%	Anion	Counts	%	Anion	Counts	%	Anion	Counts	%	Anion	Counts	%	Anion	Counts	%	Anion	Counts	%	Anion	Counts	%	Anion	Counts	%	Anion	Counts
ASP	217	39.9632	ASP	612	36.213	ASP	1217	28.7096	ASP	122	53.7445	ASP	703	38.6476	ASP	2293	33.4159	ASP	656	40.5439	GLU	2637	55.3643	GLU	15880	41.0771	GLU	366	43.7276	GLU	596	41.2172	ASP	2025	41.5896	ASP	6625	42.7668	GLU	18325	44.4253	ASP	81716	41.5401	A	56	22.8571	ASP	170
GLU	158	29.0976	GLU	596	35.2663	GLU	978	23.0715	GLU	37	16.2996	GLU	512	28.1473	GLU	1622	23.6374	GLU	629	38.8752	ASP	1576	33.0884	ASP	15338	39.6751	ASP	195	23.2975	ASP	527	36.4454	GLU	1710	35.1201	GLU	5567	35.937	ASP	16056	38.9246	GLU	77575	39.435	G	52	21.2245	GLU	161
CL	18	3.31492	ACT	28	1.6568	PO4	192	4.52937	AZI	11	4.84581	PO4	59	3.24354	CL	354	5.15885	CL	55	3.39926	SO4	89	1.86857	SO4	1611	4.16721	A	43	5.1374	A	36	2.48963	A	139	2.8548	SO4	460	2.96947	SO4	1042	2.52612	SO4	8321	4.22996	ASP	48	19.5918	A	27
G	13	2.39411	CL	28	1.6568	CYN	127	2.99599	SO4	11	4.84581	SO4	52	2.85871	ACT	257	3.74526	ACT	51	3.15204	ACT	40	0.839807	PO4	563	1.45632	G	41	4.89845	C	29	2.00553	SO4	110	2.25919	ACT	308	1.98825	ACT	417	1.01093	PO4	2805	1.42591	GLU	36	14.6939	C	26
A	12	2.20994	C	17	1.00592	ACT	94	2.2175	SO3	7	3.0837	ACT	44	2.41891	PO4	203	2.95832	SO4	44	2.71941	HEM	39	0.818812	HEM	383	0.990714	SO4	24	2.86738	CL	24	1.65975	U	79	1.62251	CL	195	1.2588	PO4	318	0.770928	ACT	1499	0.762012	C	9	3.67347	G	20
FMT	10	1.84162	PQQ	16	0.946746	CL	80	1.88724	A	5	2.20264	CL	39	2.14404	SO4	122	1.77791	FMT	18	1.11248	CO3	34	0.713836	CL	268	0.693241	CL	21	2.50896	SO4	23	1.59059	CL	73	1.49928	FMT	186	1.2007	CL	245	0.593954	HEM	1260	0.640517	U	8	3.26531	HEM	14
ACT	10	1.84162	A	14	0.828402	SO4	79	1.86365	ACT	5	2.20264	NO2	24	1.31941	KCX	120	1.74876	ACY	9	0.556242	CL	30	0.629855	ACT	218	0.563905	U	19	2.27001	G	22	1.52144	G	70	1.43767	PO4	164	1.05868	HEM	218	0.528498	CL	1253	0.636959	ACT	5	2.04082	U	11
PO4	9	1.65746	NO2	12	0.710059	ADP	72	1.69851	ZZ7	3	1.32159	PDC	24	1.31941	BCT	101	1.47187	A	9	0.556242	FMT	29	0.60886	CIT	200	0.517344	ACT	16	1.91159	HEM	11	0.760719	HEM	67	1.37605	HEM	90	0.580983	FMT	195	0.472739	CIT	604	0.307042	HEM	4	1.63265	DT	8
U	7	1.28913	ABH	12	0.710059	A	62	1.46261	PO4	3	1.32159	CYN	24	1.31941	FMT	70	1.02011	NO3	8	0.494438	PO4	20	0.419903	DT	152	0.393181	C	10	1.19474	DC	10	0.691563	DG	62	1.27336	ACY	78	0.503518	CIT	142	0.344251	FMT	545	0.277049	ACY	4	1.63265	SO4	7
SO4	7	1.28913	XCC	11	0.650888	ATP	52	1.2267	4LU	2	0.881057	AZI	21	1.15448	SIN	69	1.00554	HEM	7	0.432633	A	16	0.335923	SEP	145	0.375074	FMT	10	1.19474	DT	10	0.691563	CIT	51	1.04744	NO3	74	0.477697	NO3	104	0.252127	DG	537	0.272982	CL	4	1.63265	FAD	7
OXL	7	1.28913	PO4	10	0.591716	BEF	35	0.825666	G	2	0.881057	SO3	10	0.549753	ACY	54	0.786943	PLG	5	0.309023	CIT	11	0.230947	FMT	111	0.287126	CLA	7	0.83632	U	8	0.55325	HEC	37	0.75991	A	56	0.3615	NAP	76	0.184247	DT	469	0.238415	DG	3	1.22449	PO4	6
AKG	6	1.10497	U	10	0.591716	G	34	0.802076	FMT	2	0.881057	IOD	9	0.494777	CO3	48	0.699505	ARG	5	0.309023	C	10	0.209952	G	104	0.269019	UNL	6	0.716846	ACT	7	0.484094	PO4	33	0.677757	MLI	54	0.34859	CO3	74	0.179398	DA	456	0.231806	AZI	2	0.816327	ACT	4
KCX	6	1.10497	CIT	10	0.591716	U	33	0.778485	CYN	2	0.881057	A	8	0.439802	NO2	44	0.641212	SER	5	0.309023	DC	9	0.188957	DC	104	0.269019	STE	6	0.716846	PO4	7	0.484094	C	31	0.636681	CIT	44	0.284036	ACY	72	0.17455	DC	424	0.215539	SO4	2	0.816327	NAP	4
ACY	4	0.736648	DPY	9	0.532544	FMT	30	0.707714	NO2	2	0.881057	MLI	7	0.384827	AZI	42	0.612066	SIN	5	0.309023	U	9	0.188957	DG	103	0.266432	HEC	5	0.597372	OCS	6	0.414938	ACT	29	0.595605	DG	42	0.271125	FLC	70	0.169701	A	341	0.173346	MES	2	0.816327	AKG	3
LMR	4	0.736648	KCX	8	0.473373	KCX	29	0.684124	NIG	1	0.440529	4LU	7	0.384827	AKG	41	0.597493	PO4	5	0.309023	IOD	7	0.146966	DA	100	0.258672	MLI	5	0.597372	DG	6	0.414938	DC	25	0.513452	DA	37	0.238848	MES	68	0.164852	PLP	275	0.139795	DT	2	0.816327	1CC	3
ADP	4	0.736648	CFM	8	0.473373	POP	26	0.613352	BCT	1	0.440529	LHG	7	0.384827	CIT	38	0.553774	NTM	4	0.247219	NO3	7	0.146966	A	92	0.237978	PO4	4	0.477897	HEC	5	0.345781	DA	25	0.513452	G	36	0.232393	DG	64	0.155155	FLC	270	0.137254	2MG	1	0.408163	MES	3
PYR	4	0.736648	AZI	7	0.414201	ACY	26	0.613352	3HB	1	0.440529	PEP	6	0.329852	UDP	22	0.320606	GLY	4	0.247219	ACY	6	0.125971	FLC	71	0.183657	HEM	4	0.477897	FLC	5	0.345781	DT	23	0.472376	FLC	34	0.219482	DT	60	0.145458	ACY	260	0.13217	VAL	1	0.408163	DPY	2
6PG	3	0.552486	ICS	7	0.414201	C	24	0.566171	SIN	1	0.440529	HM6	6	0.329852	FLC	20	0.29146	IOD	4	0.247219	G	5	0.104976	U	62	0.160377	MES	3	0.358423	FMT	5	0.345781	HEA	18	0.369686	TLA	32	0.206572	DA	58	0.140609	NAP	258	0.131154	CYN	1	0.408163	DND	2
TLA	3	0.552486	AKG	7	0.414201	CXS	23	0.542581	PNK	1	0.440529	IKX	6	0.329852	TPO	19	0.276887	PYC	4	0.247219	GLY	5	0.104976	ACY	60	0.155203	NO3	3	0.358423	CLA	4	0.276625	FMT	12	0.246457	AKG	29	0.187205	DC	58	0.140609	G	240	0.122003	DC	1	0.408163	DK1	2
AUC	3	0.552486	G	7	0.414201	AKG	22	0.51899	CL	1	0.440529	BR	5	0.274876	CUZ	19	0.276887	CIT	4	0.247219	TLA	5	0.104976	MET	59	0.152616	NO2	3	0.358423	ACY	4	0.276625	NO3	10	0.205381	DT	27	0.174295	MLI	56	0.135761	LEU	240	0.122003	EPE	1	0.408163	CIT	2
CYN	2	0.368324	TLA	7	0.414201	CFM	19	0.448219	C	1	0.440529	MET	5	0.274876	ILE	18	0.262314	PLS	4	0.247219	AZI	5	0.104976	ATP	55	0.14227	EPE	3	0.358423	VAL	3	0.207469	VAL	7	0.143767	BEZ	24	0.154929	A	56	0.135761	NO3	223	0.113361	OCS	1	0.408163	HEC	2
HCT	2	0.368324	FLC	7	0.414201	AZI	18	0.424628	MLI	1	0.440529	NO3	5	0.274876	TLA	17	0.247741	DG	3	0.185414	ARG	5	0.104976	UDP	54	0.139683	GLY	3	0.358423	MLI	3	0.207469	LEU	7	0.143767	MLA	23	0.148473	GSH	54	0.130912	MLI	223	0.113361	SER	1	0.408163	GLY	1
QVE	2	0.368324	S2C	6	0.35503	NO2	18	0.424628	U	1	0.440529	KCX	5	0.274876	ZZ7	17	0.247741	DMG	2	0.123609	FLC	5	0.104976	C	53	0.137096	DA	3	0.358423	MES	3	0.207469	MLI	6	0.123229	SIN	23	0.148473	PEP	53	0.128488	NAD	215	0.109295	0A	1	0.408163	ATP	1
CHD	2	0.368324	SO4	6	0.35503	AMP	17	0.401038	I83	1	0.440529	BCT	5	0.274876	HIS	15	0.218595	CGV	2	0.123609	GDP	4	0.0839807	NAP	48	0.124163	LYS	3	0.358423	CIT	3	0.207469	CO3	5	0.10269	FUM	23	0.148473	FAD	48	0.116366	HEC	212	0.10777				2HP	1
SIN	2	0.368324	FC6	6	0.35503	TLA	16	0.377448	ICS	1	0.440529	FMT	5	0.274876	A	14	0.204022	DT	2	0.123609	MLI	4	0.0839807	IOD	44	0.113816	LHG	2	0.238949	PPU	3	0.207469	DAL	5	0.10269	HCA	20	0.129107	GLY	47	0.113942	FAD	197	0.100144				549	1
AZI	2	0.368324	CFN	6	0.35503	BCT	16	0.377448	LHG	1	0.440529	CO3	4	0.219901	ABH	14	0.204022	C	2	0.123609	FEC	4	0.0839807	TLA	44	0.113816	HM8	2	0.238949	IOD	3	0.207469	ACY	5	0.10269	OGA	20	0.129107	EPE	46	0.111518	U	190	0.0965859				RU7	1
ATP	1	0.184162	TPO	5	0.295858	SO3	15	0.353857	3HA	1	0.440529	CPT	4	0.219901	CYN	14	0.204022	U	2	0.123609	PRO	4	0.0839807	SAH	43	0.111229	MP2	2	0.238949	AZI	3	0.207469	OCS	5	0.10269	OXL	20	0.129107	MLA	42	0.101821	SEP	189	0.0960776				A6A	1
YXZ	1	0.184162	1EC	5	0.295858	CIT	15	0.353857				CIT	4	0.219901	AMP	14	0.204022	G	2	0.123609	DXL	4	0.0839807	PLP	43	0.111229	PRO	2	0.238949	HOH	2	0.138313	IOD	4	0.0821524	LYS	20	0.129107	TLA	42	0.101821	MET	186	0.0945526				PRO	1
BHN	1	0.184162	X7A	5	0.295858	ICS	15	0.353857				H2S	4	0.219901	OGA	13	0.189449	DC	2	0.123609	UDP	4	0.0839807	NO3	40	0.103469	ALA	2	0.238949	DA	2	0.138313	OXD	4	0.0821524	C	20	0.129107	U	41	0.0993963	BCT	180	0.0915025				ADP	1
ADA	1	0.184162	AUC	5	0.295858	MET	14	0.330267				ABH	4	0.219901	LMR	13	0.189449	TLA	2	0.123609	TAR	4	0.0839807	NAD	38	0.0982954	CIT	2	0.238949	TAR	2	0.138313	DED	4	0.0821524	PYR	19	0.122652	HEC	41	0.0993963	C	179	0.0909941				ARG	1
ABH	1	0.184162	FMT	5	0.295858	TPP	12	0.283086				BYN	4	0.219901	FUM	13	0.189449	PHE	2	0.123609	DA	4	0.0839807	MLI	38	0.0982954	BO3	1	0.119474	24G	2	0.138313	P3S	4	0.0821524	MES	18	0.116197	AKG	41	0.0993963	TLA	176	0.0894691				IOD	1
4OC	1	0.184162	FSO	5	0.295858	APC	12	0.283086				FLC	4	0.219901	MLI	13	0.189449	S1S	2	0.123609	MES	3	0.0629855	DTP	36	0.0931219	9X6	1	0.119474	PTR	2	0.138313	CXA	4	0.0821524	PEP	17	0.109741	SIN	40	0.096972	ATP	173	0.087944				C2G	1
2KZ	1	0.184162	GDP	4	0.236686	PPK	11	0.259495				GRE	3	0.164926	MLT	12	0.174876	6NA	1	0.0618047	MLA	3	0.0629855	ARG	35	0.0905352	M3Q	1	0.119474	UNL	2	0.138313	EIP	4	0.0821524	AZI	16	0.103286	OGA	39	0.0945477	UDP	172	0.0874357				BRU	1
BH2	1	0.184162	HIO	4	0.236686	CRN	11	0.259495				GG6	3	0.164926	TRP	12	0.174876	1JY	1	0.0618047	MTG	3	0.0629855	HEC	33	0.0853618	ACY	1	0.119474	PHE	2	0.138313	GLY	3	0.0616143	GLY	16	0.103286	C	38	0.0921234	SAH	172	0.0874357				GO1	1
EPE	1	0.184162	GRE	4	0.236686	ALF	10	0.235905				CXS	3	0.164926	LMP	12	0.174876	DA	1	0.0618047	HEC	3	0.0629855	EPE	32	0.082775	ARG	1	0.119474	NFQ	2	0.138313	LAC	3	0.0616143	HEC	15	0.0968304	BEZ	34	0.0824262	AMP	170	0.086419				CL	1
BHZ	1	0.184162	CTP	4	0.236686	CFN	10	0.235905				DCJ	3	0.164926	OXL	10	0.14573	CXS	1	0.0618047	NAP	3	0.0629855	TPO	31	0.0801883	AZI	1	0.119474	API	2	0.138313	GDP	3	0.0616143	SO3	15	0.0968304	ALA	33	0.0800019	VAL	169	0.0859107				DA	1
NO2	1	0.184162	FUM	4	0.236686	FCN	9	0.212314				GB	3	0.164926	UD2	10	0.14573	21D	1	0.0618047	OXL	3	0.0629855	GTP	30	0.0776016	BCN	1	0.119474	NGQ	2	0.138313	FUN	3	0.0616143	EPE	15	0.0968304	G	32	0.0775776	ADP	161	0.0818439				H6V	1
THE	1	0.184162	CYN	4	0.236686	CO3	9	0.212314				FMN	3	0.164926	CUK	10	0.14573	2BO	1	0.0618047	DG	3	0.0629855	SIN	29	0.0750149	BDH	1	0.119474	ALA	2	0.138313	922	3	0.0616143	SAH	14	0.0903751	PQQ	32	0.0775776	GSH	155	0.0787938				TAF	1
S2C	1	0.184162	ACY	4	0.236686	DTP	9	0.212314				DC	3	0.164926	C	10	0.14573	3FL	1	0.0618047	LYS	3	0.0629855	SAM	28	0.0724282	BHU	1	0.119474	ILE	2	0.138313	0X9	3	0.0616143	NAD	13	0.0839197	AZI	31	0.0751533	EPE	148	0.0752354				H6S	1
PQQ	1	0.184162	DG	4	0.236686	FLC	9	0.212314				ZZ7	3	0.164926	BR	10	0.14573	CIR	1	0.0618047	GSH	2	0.0419903	FAD	28	0.0724282	HCA	1	0.119474	9BZ	2	0.138313	11B	3	0.0616143	CO3	13	0.0839197	PHE	30	0.072729	MES	145	0.0737103				FMT	1
POP	1	0.184162	OGA	4	0.236686	DA	9	0.212314				ACY	3	0.164926	B30	10	0.14573	3ML	1	0.0618047	GRO	2	0.0419903	C2E	27	0.0698414	BY0	1	0.119474	BR	1	0.0691563	343	3	0.0616143	SER	13	0.0839197	NAD	29	0.0703047	CO3	141	0.0716769				FPK	1
OGA	1	0.184162	XA2	4	0.236686	ACP	8	0.188724				AMP	3	0.164926	SO3	9	0.131157	4ML	1	0.0618047	UNL	2	0.0419903	MES	27	0.0698414	HJ7	1	0.119474	8YF	1	0.0691563	API	3	0.0616143	DC	13	0.0839197	ARG	26	0.0630318	SIN	140	0.0711686				GTP	1
O1N	1	0.184162	2HP	3	0.177515	UDP	8	0.188724				0N8	3	0.164926	NO3	9	0.131157	5M8	1	0.0618047	I84	2	0.0419903	POP	24	0.0620813	KC1	1	0.119474	9B3	1	0.0691563	5CM	3	0.0616143	U	12	0.0774643	LYS	26	0.0630318	MLA	138	0.0701519				E5X	1
NAP	1	0.184162	IOD	3	0.177515	PC	7	0.165133				OCS	3	0.164926	BJ2	9	0.131157	AKG	1	0.0618047	ICT	2	0.0419903	LYS	24	0.0620813	NFQ	1	0.119474	C6L	1	0.0691563	SO3	3	0.0616143	DOR	12	0.0774643	HIS	25	0.0606075	COA	126	0.0640517
BR	1	0.184162	8UX	3	0.177515	GLR	7	0.165133				CFM	3	0.164926	792	8	0.116584	ADP	1	0.0618047	AMP	2	0.0419903	NDP	23	0.0594946	CO3	1	0.119474	0X9	1	0.0691563	86A	3	0.0616143	ADP	12	0.0774643	CYN	25	0.0606075	GLY	119	0.0604933
MLI	1	0.184162	SF3	3	0.177515	G4S	7	0.165133				CO2	3	0.164926	PPF	8	0.116584	BUL	1	0.0618047	DT	2	0.0419903	DCP	23	0.0594946	M5P	1	0.119474	8XW	1	0.0691563	7B0	2	0.0410762	ARG	10	0.0645536	LEU	24	0.0581832	ARG	117	0.0594766
H2S	1	0.184162	SIN	3	0.177515	V1S	7	0.165133				C	3	0.164926	F	8	0.116584	BR	1	0.0618047	ZST	2	0.0419903	OAA	22	0.0569078	DG	1	0.119474	3C7	1	0.0691563	33Z	2	0.0410762	ALA	10	0.0645536	PRO	24	0.0581832	NDP	115	0.0584599
FEG	1	0.184162	BEF	3	0.177515	TTP	7	0.165133				BO3	2	0.109951	DA	8	0.116584	7QA	1	0.0618047	UD1	2	0.0419903	ICT	22	0.0569078	DT	1	0.119474	BRU	1	0.0691563	73N	2	0.0410762	PXP	10	0.0645536	NDP	24	0.0581832	PRO	115	0.0584599
CTP	1	0.184162	NO3	3	0.177515	CDP	7	0.165133				4MJ	2	0.109951	MX1	8	0.116584	BCT	1	0.0618047	PO3	2	0.0419903	LEU	22	0.0569078	IOD	1	0.119474	A12	1	0.0691563	GLN	2	0.0410762	HIS	10	0.0645536	OAA	22	0.0533346	TRP	114	0.0579516
CIT	1	0.184162	X8A	3	0.177515	DG	7	0.165133				ICS	2	0.109951	PC	8	0.116584	BCN	1	0.0618047	SUZ	2	0.0419903	PLG	22	0.0569078	FUN	1	0.119474	5AA	1	0.0691563	COH	2	0.0410762	NIO	10	0.0645536	SAM	22	0.0533346	TYR	113	0.0574432
C	1	0.184162	4U7	2	0.118343	OGA	7	0.165133				HEM	2	0.109951	TAR	7	0.102011	AZI	1	0.0618047	UD2	2	0.0419903	3PG	21	0.0543211	MLA	1	0.119474	ARG	1	0.0691563	C6G	2	0.0410762	ORO	10	0.0645536	ASJ	21	0.0509103	CYN	113	0.0574432
03W	1	0.184162	BHZ	2	0.118343	AF3	7	0.165133				13P	2	0.109951	K9B	7	0.102011	83Y	1	0.0618047	TYR	2	0.0419903	PHE	21	0.0543211	8XW	1	0.119474	8PO	1	0.0691563	EPE	2	0.0410762	FAD	10	0.0645536	PYR	21	0.0509103	ALA	110	0.0559182
			OAA	2	0.118343	PPV	6	0.141543				1AA	2	0.109951	BEF	7	0.102011	ASN	1	0.0618047	PDC	2	0.0419903	DGT	21	0.0543211				8D4	1	0.0691563	ADP	2	0.0410762	6PG	10	0.0645536	OCS	21	0.0509103	PHE	110	0.0559182
			BR	2	0.118343	GTP	6	0.141543				2T8	2	0.109951	ICS	7	0.102011	API	1	0.0618047	MSF	2	0.0419903	PRO	20	0.0517344				BIP	1	0.0691563	ASN	2	0.0410762	BCT	9	0.0580983	VAL	20	0.048486	LYS	108	0.0549015
			5XR	2	0.118343	UTP	6	0.141543				3HB	2	0.109951	GDP	7	0.102011	ALA	1	0.0618047	SIN	2	0.0419903	COA	19	0.0491477				ADA	1	0.0691563	AZI	2	0.0410762	IHP	9	0.0580983	BCT	20	0.048486	POP	106	0.0538848
			DO3	2	0.118343	V1D	6	0.141543				5OM	2	0.109951	G	7	0.102011	7PR	1	0.0618047	MTD	2	0.0419903	SIA	18	0.046561				BCT	1	0.0691563	BHI	2	0.0410762	PHE	9	0.0580983	SAH	20	0.048486	KCX	104	0.0528681
			5AB	2	0.118343	GDP	6	0.141543				BEZ	2	0.109951	3DR	7	0.102011	YZS	1	0.0618047	SEP	2	0.0419903	BR	18	0.046561				AKG	1	0.0691563	HIS	2	0.0410762	SIA	9	0.0580983	PD2	20	0.048486	GTP	104	0.0528681
			CO3	2	0.118343	V1P	6	0.141543				5ON	2	0.109951	OCS	7	0.102011	DIF	1	0.0618047	ATH	1	0.0209952	SRM	18	0.046561				60M	1	0.0691563	C2E	2	0.0410762	LMR	8	0.0516429	GDP	19	0.0460617	TPO	102	0.0518514
			WCC	2	0.118343	TV7	6	0.141543				A3P	2	0.109951	ASN	7	0.102011	SCA	1	0.0618047	TSU	1	0.0209952	OXM	18	0.046561				7QD	1	0.0691563	ZNH	2	0.0410762	7N5	7	0.0451875	MET	17	0.0412131	LLP	102	0.0518514
			RHE	2	0.118343	6DK	6	0.141543				CFN	2	0.109951	GLY	7	0.102011	PHT	1	0.0618047	ASN	1	0.0209952	ADP	17	0.0439742				78U	1	0.0691563	LY0	2	0.0410762	OCS	7	0.0451875	MLT	17	0.0412131	AKG	101	0.0513431
			DOE	2	0.118343	RHE	6	0.141543				AF3	2	0.109951	VII	7	0.102011	PLP	1	0.0618047	TRA	1	0.0209952	IPE	17	0.0439742				FPP	1	0.0691563	PSL	2	0.0410762	DND	7	0.0451875	ATP	16	0.0387888	SER	100	0.0508347
			0O2	2	0.118343	FKS	6	0.141543				DTZ	2	0.109951	K26	7	0.102011	PPI	1	0.0618047	TPO	1	0.0209952	GLY	17	0.0439742				COM	1	0.0691563	MES	2	0.0410762	GSH	7	0.0451875	F43	16	0.0387888	FMN	99	0.0503264
			PYI	2	0.118343	LEU	6	0.141543				ATP	2	0.109951	IOD	6	0.0874381	PRO	1	0.0618047	ATP	1	0.0209952	LLP	16	0.0413875				LHY	1	0.0691563	TLA	2	0.0410762	UNL	7	0.0451875	DND	15	0.0363645	HIS	98	0.049818
			1EE	2	0.118343	8DG	5	0.117952				DMS	2	0.109951	QNA	6	0.0874381	Q01	1	0.0618047	ALA	1	0.0209952	NAI	16	0.0413875				SO3	1	0.0691563	THR	2	0.0410762	BR	7	0.0451875	CHD	15	0.0363645	ILE	96	0.0488013
			SNW	2	0.118343	A12	5	0.117952				COA	2	0.109951	PA5	6	0.0874381	SAR	1	0.0618047	BCT	1	0.0209952	TTP	16	0.0413875				S5Z	1	0.0691563	SIN	2	0.0410762	GLN	6	0.0387322	CDL	14	0.0339402	SAM	90	0.0457512
			HE8	2	0.118343	NLA	5	0.117952				GDP	2	0.109951	TA8	6	0.0874381	SFI	1	0.0618047	BET	1	0.0209952	MLA	15	0.0388008				RS7	1	0.0691563	SER	2	0.0410762	BJ2	6	0.0387322	TYR	14	0.0339402	TPP	88	0.0447345
			HIS	2	0.118343	3PO	5	0.117952				ILE	2	0.109951	AF3	6	0.0874381	OCS	1	0.0618047	BEZ	1	0.0209952	F6P	15	0.0388008				PRO	1	0.0691563	L06	2	0.0410762	SRM	6	0.0387322	LHG	14	0.0339402	OGA	86	0.0437178
			ATP	2	0.118343	MGF	5	0.117952				JQZ	2	0.109951	BEZ	6	0.0874381	SLO	1	0.0618047	BR	1	0.0209952	HIS	15	0.0388008				P20	1	0.0691563	L98	2	0.0410762	FMN	6	0.0387322	SO3	14	0.0339402	F6P	86	0.0437178
			NTM	2	0.118343	5GP	5	0.117952				TPO	2	0.109951	GG6	6	0.0874381	SRM	1	0.0618047	BRU	1	0.0209952	MLT	15	0.0388008				ORN	1	0.0691563	KCX	2	0.0410762	CYC	6	0.0387322	TTP	13	0.0315159	2GP	76	0.0386344
			NFS	2	0.118343	AUC	5	0.117952				U5P	2	0.109951	Y38	6	0.0874381	SSN	1	0.0618047	TLO	1	0.0209952	PLS	15	0.0388008				O2V	1	0.0691563	P2S	2	0.0410762	VAL	6	0.0387322	GLN	13	0.0315159	HEA	72	0.036601
			MTD	2	0.118343	GOA	5	0.117952				TLA	2	0.109951	GDU	6	0.0874381	T3D	1	0.0618047	CAA	1	0.0209952	BCT	14	0.0362141				NXA	1	0.0691563	PAM	2	0.0410762	IOD	5	0.0322768	FUM	12	0.0290916	DTP	72	0.036601
			DC	2	0.118343	BJ2	5	0.117952				UNL	2	0.109951	GB	6	0.0874381	THR	1	0.0618047	ALQ	1	0.0209952	CO3	14	0.0362141				NO3	1	0.0691563	AGF	1	0.0205381	GLV	5	0.0322768	BEM	12	0.0290916	GDP	66	0.0335509
			MLI	2	0.118343	DPF	5	0.117952				KC1	2	0.109951	SER	6	0.0874381	TLL	1	0.0618047	MGD	1	0.0209952	OXL	14	0.0362141				NIO	1	0.0691563	TCE	1	0.0205381	MTE	5	0.0322768	KCX	12	0.0290916	ASN	65	0.0330426
			999	2	0.118343	DGT	5	0.117952				OK3	2	0.109951	DT	6	0.0874381	OXL	1	0.0618047	AKG	1	0.0209952	SER	13	0.0336274				MLA	1	0.0691563	720	1	0.0205381	TYR	5	0.0322768	AR6	12	0.0290916	GLN	64	0.0325342
			AMP	2	0.118343	DT	5	0.117952				MMQ	2	0.109951	0ZD	6	0.0874381	NM2	1	0.0618047	ACO	1	0.0209952	GDU	13	0.0336274				MED	1	0.0691563	ATP	1	0.0205381	QVE	5	0.0322768	KAI	12	0.0290916	NAI	62	0.0315175
			0JC	2	0.118343	EDT	5	0.117952				OXL	2	0.109951	U	6	0.0874381	E8P	1	0.0618047	1HA	1	0.0209952	TAR	13	0.0336274				MCO	1	0.0691563	73P	1	0.0205381	ACO	5	0.0322768	TAR	12	0.0290916	DCP	58	0.0294841
			7MT	2	0.118343	MLI	5	0.117952				BAH	1	0.0549753	5GP	6	0.0874381	GSH	1	0.0618047	1PS	1	0.0209952	TP7	13	0.0336274				M5P	1	0.0691563	TFA	1	0.0205381	OAA	5	0.0322768	NO2	12	0.0290916	5GP	56	0.0284674
			PDC	2	0.118343	3DR	5	0.117952				TFG	1	0.0549753	DPS	6	0.0874381	EPR	1	0.0618047	21D	1	0.0209952	A8S	13	0.0336274				LEU	1	0.0691563	83Y	1	0.0205381	TEO	5	0.0322768	OXL	11	0.0266673	OCS	55	0.0279591
			POP	2	0.118343	IMO	4	0.0943619				TV7	1	0.0549753	67M	6	0.0874381	FLC	1	0.0618047	2CG	1	0.0209952	ALA	12	0.0310406				DAS	1	0.0691563	89R	1	0.0205381	MLT	5	0.0322768	UNL	11	0.0266673	FBP	53	0.0269424
			BMH	1	0.0591716	TAR	4	0.0943619				TV1	1	0.0549753	CPT	6	0.0874381	FOA	1	0.0618047	2NE	1	0.0209952	FMN	12	0.0310406				L98	1	0.0691563	SBH	1	0.0205381	POP	5	0.0322768	BE2	11	0.0266673	OAA	52	0.026434
			B30	1	0.0591716	TFG	4	0.0943619				Q02	1	0.0549753	OAA	5	0.0728651	FX4	1	0.0618047	2W8	1	0.0209952	SQD	11	0.0284539				KC1	1	0.0691563	SRT	1	0.0205381	SAM	5	0.0322768	LMR	11	0.0266673	PLG	50	0.0254174
			A2P	1	0.0591716	5OM	4	0.0943619				ACO	1	0.0549753	H27	5	0.0728651	G6P	1	0.0618047	2W9	1	0.0209952	TRP	11	0.0284539				ING	1	0.0691563	9B3	1	0.0205381	PLG	5	0.0322768	ADA	11	0.0266673	SRT	50	0.0254174
			DA	1	0.0591716	DPO	4	0.0943619				TMP	1	0.0549753	8YL	5	0.0728651	GLN	1	0.0618047	2WB	1	0.0209952	VAL	11	0.0284539				ID8	1	0.0691563	PRO	1	0.0205381	CYN	5	0.0322768	COA	11	0.0266673	CDL	50	0.0254174
			ACP	1	0.0591716	DC	4	0.0943619				Q03	1	0.0549753	B9Z	5	0.0728651	HCV	1	0.0618047	3PI	1	0.0209952	GDP	11	0.0284539				HIS	1	0.0691563	6HE	1	0.0205381	PGU	5	0.0322768	SQD	10	0.024243	DGT	49	0.024909
			CUK	1	0.0591716	K26	4	0.0943619				RBN	1	0.0549753	068	5	0.0728651	NAP	1	0.0618047	48I	1	0.0209952	DG2	11	0.0284539				HFP	1	0.0691563	ARG	1	0.0205381	ATP	5	0.0322768	SAL	10	0.024243	MLT	49	0.024909
			9ON	1	0.0591716	PQQ	4	0.0943619				AKR	1	0.0549753	1EC	5	0.0728651	LMR	1	0.0618047	6PC	1	0.0209952	AKG	10	0.0258672				HFA	1	0.0691563	SDR	1	0.0205381	PLS	4	0.0258214	UDP	10	0.024243	CYS	48	0.0244007
			CPT	1	0.0591716	LPR	4	0.0943619				S8A	1	0.0549753	D0W	5	0.0728651	LP5	1	0.0618047	6S2	1	0.0209952	CKP	10	0.0258672				GOL	1	0.0691563	6MZ	1	0.0205381	FOT	4	0.0258214	MMK	10	0.024243	TYS	47	0.0238923
			82N	1	0.0591716	OXL	4	0.0943619				RU7	1	0.0549753	NCD	5	0.0728651	MET	1	0.0618047	71V	1	0.0209952	IPM	10	0.0258672				GLY	1	0.0691563	HNN	1	0.0205381	OLA	4	0.0258214	BDP	10	0.024243	TTP	45	0.0228756
			ASN	1	0.0591716	DGI	4	0.0943619				TBR	1	0.0549753	HCA	5	0.0728651	MHI	1	0.0618047	83Y	1	0.0209952	PYR	10	0.0258672				GGL	1	0.0691563	6CQ	1	0.0205381	COA	4	0.0258214	PGU	10	0.024243	AZI	44	0.0223673
			7IA	1	0.0591716	XCC	4	0.0943619				9ON	1	0.0549753	MET	5	0.0728651	MLI	1	0.0618047	UN1	1	0.0209952	IHP	10	0.0258672				FMN	1	0.0691563	2QP	1	0.0205381	NCD	4	0.0258214	AMQ	10	0.024243	FUM	44	0.0223673
			ADP	1	0.0591716	MDN	4	0.0943619				SLB	1	0.0549753	DDZ	5	0.0728651	MLT	1	0.0618047	TDA	1	0.0209952	AMP	10	0.0258672				EPE	1	0.0691563	0A	1	0.0205381	GDS	4	0.0258214	BET	10	0.024243	PLM	43	0.0218589
			2KZ	1	0.0591716	SEP	4	0.0943619				SL6	1	0.0549753	LEU	5	0.0728651	1CC	1	0.0618047	CTP	1	0.0209952	LBV	10	0.0258672				DDW	1	0.0691563	0G	1	0.0205381	OXM	4	0.0258214	PGD	9	0.0218187	BEZ	42	0.0213506
			38I	1	0.0591716	F	4	0.0943619				SIN	1	0.0549753	PLM	5	0.0728651				SUS	1	0.0209952	PDC	9	0.0232805				DBS	1	0.0691563	0R8	1	0.0205381	EPS	4	0.0258214	ADP	9	0.0218187	TAR	42	0.0213506
			BHN	1	0.0591716	PD2	4	0.0943619				AP2	1	0.0549753	DQY	5	0.0728651				PNN	1	0.0209952	6PG	9	0.0232805				00C	1	0.0691563	UPG	1	0.0205381	6OD	4	0.0258214	DAN	9	0.0218187	SO3	42	0.0213506
			C5P	1	0.0591716	BEZ	4	0.0943619				8YL	1	0.0549753	HWU	5	0.0728651				OYP	1	0.0209952	TYR	9	0.0232805							UGC	1	0.0205381	PEK	4	0.0258214	HEA	9	0.0218187	LMR	41	0.0208422
			ARG	1	0.0591716	DCT	4	0.0943619				92K	1	0.0549753	HEM	5	0.0728651				OCS	1	0.0209952	GSH	8	0.0206938							1AL	1	0.0205381	SUZ	4	0.0258214	PLP	9	0.0218187	PQQ	40	0.0203339
			40E	1	0.0591716	TPS	4	0.0943619				3HA	1	0.0549753	PHE	5	0.0728651				GN1	1	0.0209952	FUM	8	0.0206938							2B8	1	0.0205381	ADA	4	0.0258214	APR	8	0.0193944	IHP	40	0.0203339
			3PO	1	0.0591716	TRP	4	0.0943619				YI6	1	0.0549753	033	5	0.0728651				NTC	1	0.0209952	MYR	8	0.0206938							2BO	1	0.0205381	AMP	4	0.0258214	SER	8	0.0193944	PYR	40	0.0203339
			YXX	1	0.0591716	H2S	4	0.0943619				0RV	1	0.0549753	X7A	5	0.0728651				NIC	1	0.0209952	CTP	8	0.0206938							2D8	1	0.0205381	PYC	4	0.0258214	ZZ7	8	0.0193944	OXL	39	0.0198255
			DOF	1	0.0591716	8P8	3	0.0707714				XI7	1	0.0549753	VI	5	0.0728651				H2S	1	0.0209952	CYS	8	0.0206938							TYR	1	0.0205381	ICT	4	0.0258214	POP	8	0.0193944	CXS	38	0.0193172
			QR1	1	0.0591716	MES	3	0.0707714				VPD	1	0.0549753	UDH	5	0.0728651				MXR	1	0.0209952	DMA	8	0.0206938							BEZ	1	0.0205381	LEU	4	0.0258214	TPO	8	0.0193944	TDP	38	0.0193172
			NAP	1	0.0591716	CTP	3	0.0707714				1UC	1	0.0549753	DG	4	0.058292				HHD	1	0.0209952	GLR	8	0.0206938							TPO	1	0.0205381	HZZ	4	0.0258214	MGD	8	0.0193944	PGA	37	0.0188088
			NFU	1	0.0591716	GTF	3	0.0707714				2BA	1	0.0549753	OK3	4	0.058292				HIS	1	0.0209952	UPG	7	0.018107							3K0	1	0.0205381	SSN	4	0.0258214	DSN	8	0.0193944	CTP	37	0.0188088
			OCA	1	0.0591716	AD9	3	0.0707714				2NO	1	0.0549753	ALF	4	0.058292				MMP	1	0.0209952	ILE	7	0.018107							3KS	1	0.0205381	ASN	4	0.0258214	IOD	8	0.0193944	CHD	36	0.0183005
			OL3	1	0.0591716	D0W	3	0.0707714				V1D	1	0.0549753	ARG	4	0.058292				MIC	1	0.0209952	BEF	7	0.018107							3NF	1	0.0205381	BTN	4	0.0258214	CYS	8	0.0193944	TYD	36	0.0183005
			OL5	1	0.0591716	D3T	3	0.0707714				3BY	1	0.0549753	BCN	4	0.058292				ITA	1	0.0209952	GPJ	7	0.018107							3PG	1	0.0205381	OXD	3	0.0193661	FMN	8	0.0193944	3PG	36	0.0183005
			OLZ	1	0.0591716	KDG	3	0.0707714				URP	1	0.0549753	KIV	4	0.058292				JP2	1	0.0209952	ASN	7	0.018107							414	1	0.0205381	D0W	3	0.0193661	CXS	8	0.0193944	SIA	35	0.0177921
			P60	1	0.0591716	D4T	3	0.0707714				C6L	1	0.0549753	BSI	4	0.058292				KIV	1	0.0209952	CYN	7	0.018107							4HE	1	0.0205381	PA5	3	0.0193661	2AN	8	0.0193944	PC	35	0.0177921
			PC	1	0.0591716	MLT	3	0.0707714				3PG	1	0.0549753	CFN	4	0.058292				LEU	1	0.0209952	LMR	7	0.018107							4MA	1	0.0205381	IMN	3	0.0193661	GTX	7	0.0169701	TP7	34	0.0172838
			PD2	1	0.0591716	CS2	3	0.0707714				4IR	1	0.0549753	CO2	4	0.058292				GB	1	0.0209952	4IP	7	0.018107							6CO	1	0.0205381	6OH	3	0.0193661	2HP	7	0.0169701	IMP	34	0.0172838
			PHE	1	0.0591716	GB	3	0.0707714				UDP	1	0.0549753	D0Z	4	0.058292				FOA	1	0.0209952	SO3	7	0.018107							B9N	1	0.0205381	DZM	3	0.0193661	PLM	7	0.0169701	LHG	33	0.0167755
			QR4	1	0.0591716	DXG	3	0.0707714				4TF	1	0.0549753	DPF	4	0.058292				COA	1	0.0209952	CXS	7	0.018107							BR	1	0.0205381	API	3	0.0193661	NAI	7	0.0169701	COM	33	0.0167755
			MGF	1	0.0591716	GPP	3	0.0707714				5OL	1	0.0549753	DPY	4	0.058292				PY0	1	0.0209952	OXQ	7	0.018107							P20	1	0.0205381	MN1	3	0.0193661	TRP	7	0.0169701	NO2	33	0.0167755
			QRA	1	0.0591716	DCP	3	0.0707714				U	1	0.0549753	DTZ	4	0.058292				LX5	1	0.0209952	FBP	7	0.018107							LDK	1	0.0205381	KCX	3	0.0193661	2HG	7	0.0169701	U5P	33	0.0167755
			QRJ	1	0.0591716	BHZ	3	0.0707714				5OO	1	0.0549753	SEP	4	0.058292				CYN	1	0.0209952	I3P	7	0.018107							FAD	1	0.0205381	LAC	3	0.0193661	4LU	7	0.0169701	FPP	33	0.0167755
			RU0	1	0.0591716	ANP	3	0.0707714				8BR	1	0.0549753	SAL	4	0.058292				CYS	1	0.0209952	GLN	7	0.018107							FEC	1	0.0205381	BO3	3	0.0193661	3PG	7	0.0169701	UPG	33	0.0167755
			TAR	1	0.0591716	HOH	3	0.0707714				8YF	1	0.0549753	M3Q	4	0.058292				SSN	1	0.0209952	GDX	7	0.018107							FH9	1	0.0205381	CXS	3	0.0193661	HCA	7	0.0169701	IPE	33	0.0167755
			TMP	1	0.0591716	FPS	3	0.0707714				PLU	1	0.0549753	GRE	4	0.058292				SPA	1	0.0209952	0GY	6	0.0155203							LU0	1	0.0205381	NPS	3	0.0193661	PQ5	7	0.0169701	SQD	32	0.0162671
			TPP	1	0.0591716	DUP	3	0.0707714				PAE	1	0.0549753	HIW	4	0.058292				DDG	1	0.0209952	88N	6	0.0155203							ZAF	1	0.0205381	NO2	3	0.0193661	API	7	0.0169701	PGV	32	0.0162671
			TYR	1	0.0591716	LYS	3	0.0707714				CDI	1	0.0549753	A12	4	0.058292				DOC	1	0.0209952	S0N	6	0.0155203							LHY	1	0.0205381	BZJ	3	0.0193661	ASA	7	0.0169701	UD1	31	0.0157588
			U5P	1	0.0591716	7BC	3	0.0707714				GLY	1	0.0549753	NLA	4	0.058292				DOY	1	0.0209952	PTR	6	0.0155203							G4P	1	0.0205381	CBO	3	0.0193661	ORN	7	0.0169701	APC	31	0.0157588
			XA1	1	0.0591716	1KM	3	0.0707714				LMP	1	0.0549753	PAE	4	0.058292				SER	1	0.0209952	CS2	6	0.0155203							LFF	1	0.0205381	MET	3	0.0193661	1U8	6	0.0145458	BR	31	0.0157588
			XC3	1	0.0591716	OKP	3	0.0707714				LHT	1	0.0549753	7BC	4	0.058292				DWZ	1	0.0209952	EPS	6	0.0155203							GGL	1	0.0205381	MLC	3	0.0193661	RZP	6	0.0145458	PLS	31	0.0157588
			MLT	1	0.0591716	PI	3	0.0707714				FZZ	1	0.0549753	8YF	4	0.058292				DYN	1	0.0209952	BEZ	6	0.0155203							GLV	1	0.0205381	8OZ	3	0.0193661	GOA	6	0.0145458	FEC	31	0.0157588
			MED	1	0.0591716	NO3	3	0.0707714				G	1	0.0549753	2HE	4	0.058292				EK8	1	0.0209952	PLM	6	0.0155203							M3R	1	0.0205381	3NG	3	0.0193661	AMP	6	0.0145458	CAP	30	0.0152504
			DYA	1	0.0591716	SIN	3	0.0707714				G1K	1	0.0549753	XA2	4	0.058292				EPE	1	0.0209952	OCS	6	0.0155203							GOL	1	0.0205381	2VS	3	0.0193661	OTA	6	0.0145458	UNL	30	0.0152504
			HCT	1	0.0591716	SAM	3	0.0707714				L8J	1	0.0549753	3S0	4	0.058292				FDA	1	0.0209952	NO2	6	0.0155203							GTP	1	0.0205381	2PC	3	0.0193661	SHI	6	0.0145458	GDU	30	0.0152504
			EDT	1	0.0591716	DDZ	2	0.0471809				YPT	1	0.0549753	5RP	4	0.058292				SA8	1	0.0209952	ADA	6	0.0155203							HAS	1	0.0205381	54G	3	0.0193661	DTP	6	0.0145458	F43	30	0.0152504
			EKD	1	0.0591716	UGA	2	0.0471809				GLN	1	0.0549753	2T8	4	0.058292				1CP	1	0.0209952	ACO	6	0.0155203							HC4	1	0.0205381	074	3	0.0193661	SIA	6	0.0145458	BEF	30	0.0152504
			EOT	1	0.0591716	G3P	2	0.0471809				JRN	1	0.0549753	28P	4	0.058292							AMZ	6	0.0155203							JAA	1	0.0205381	PRO	3	0.0193661	NIO	6	0.0145458	PMP	30	0.0152504
			FAD	1	0.0591716	COA	2	0.0471809				JRH	1	0.0549753	9ON	3	0.043719							FEC	6	0.0155203							ING	1	0.0205381	2OP	3	0.0193661	SRT	5	0.0121215	NHE	28	0.0142337
			FB5	1	0.0591716	B30	2	0.0471809				FKS	1	0.0549753	FLX	3	0.043719							UDX	6	0.0155203							HFA	1	0.0205381	TFA	3	0.0193661	S2G	5	0.0121215	ACO	28	0.0142337
			FB6	1	0.0591716	GLN	2	0.0471809				GTP	1	0.0549753	E3P	3	0.043719							UTP	6	0.0155203							HGY	1	0.0205381	RDF	3	0.0193661	SUZ	5	0.0121215	MGD	27	0.0137254
			FS2	1	0.0591716	7MF	2	0.0471809				GY4	1	0.0549753	E5N	3	0.043719							UGA	6	0.0155203							ILE	1	0.0205381	173	3	0.0193661	DAB	5	0.0121215	4IP	27	0.0137254
			GFN	1	0.0591716	GLY	2	0.0471809				HCA	1	0.0549753	ENL	3	0.043719							GRG	5	0.0129336							EVM	1	0.0205381	VRB	3	0.0193661	ZST	5	0.0121215	OXM	27	0.0137254
			GTF	1	0.0591716	PRP	2	0.0471809				JQQ	1	0.0549753	24F	3	0.043719							PP9	5	0.0129336							EFS	1	0.0205381	PPY	3	0.0193661	SYM	5	0.0121215	DCT	27	0.0137254
			H2S	1	0.0591716	PPF	2	0.0471809				HIW	1	0.0549753	S2C	3	0.043719							LDT	5	0.0129336							BIP	1	0.0205381	3PG	3	0.0193661	KPI	5	0.0121215	IOD	27	0.0137254
			HDQ	1	0.0591716	D6N	2	0.0471809				JQK	1	0.0549753	1K4	3	0.043719							APC	5	0.0129336							MYR	1	0.0205381	TPO	3	0.0193661	OOG	5	0.0121215	THR	26	0.013217
			M3P	1	0.0591716	GTQ	2	0.0471809				HMG	1	0.0549753	0WO	3	0.043719							KCX	5	0.0129336							HJ7	1	0.0205381	2PG	3	0.0193661	TOL	5	0.0121215	KDO	26	0.013217
			HFD	1	0.0591716	D0Z	2	0.0471809				HOH	1	0.0549753	S0H	3	0.043719							K6H	5	0.0129336							BTW	1	0.0205381	UGB	2	0.0129107	ASN	5	0.0121215	C5P	26	0.013217
			HGI	1	0.0591716	PHE	2	0.0471809				I83	1	0.0549753	077	3	0.043719							HDD	5	0.0129336							O2V	1	0.0205381	1CC	2	0.0129107	DHE	5	0.0121215	MAE	25	0.0127087
			ICE	1	0.0591716	PHD	2	0.0471809				M3C	1	0.0549753	IN7	3	0.043719							ACP	5	0.0129336							O2S	1	0.0205381	CO2	2	0.0129107	LLP	5	0.0121215	MYR	25	0.0127087
			ICG	1	0.0591716	ASN	2	0.0471809				FC6	1	0.0549753	K1U	3	0.043719							PEP	5	0.0129336							NTE	1	0.0205381	UGA	2	0.0129107	LMP	5	0.0121215	A3P	25	0.0127087
			ICZ	1	0.0591716	HCT	2	0.0471809				CDP	1	0.0549753	K2U	3	0.043719							IP5	5	0.0129336							NO5	1	0.0205381	CMA	2	0.0129107	ACO	5	0.0121215	TAU	25	0.0127087
			IMO	1	0.0591716	HEM	2	0.0471809				CUK	1	0.0549753	2K8	3	0.043719							PPV	5	0.0129336							NHM	1	0.0205381	SAL	2	0.0129107	G9Z	5	0.0121215	2HP	24	0.0122003
			LFX	1	0.0591716	HFD	2	0.0471809				JQH	1	0.0549753	THR	3	0.043719							2B4	5	0.0129336							CMA	1	0.0205381	COD	2	0.0129107	SFG	5	0.0121215	GLR	23	0.011692
			LIZ	1	0.0591716	APG	2	0.0471809				P9T	1	0.0549753	DEO	3	0.043719							SAL	5	0.0129336							NAD	1	0.0205381	CTP	2	0.0129107	GDS	5	0.0121215	TMP	22	0.0111836
			LMR	1	0.0591716	HJ7	2	0.0471809				CI1	1	0.0549753	DC	3	0.043719							XYH	5	0.0129336							CPM	1	0.0205381	LHG	2	0.0129107	RLP	5	0.0121215	LBV	22	0.0111836
			LYS	1	0.0591716	2T8	2	0.0471809				OTD	1	0.0549753	X8A	3	0.043719							152	5	0.0129336							M6P	1	0.0205381	S1S	2	0.0129107	DUT	4	0.0096972	PPV	21	0.0106753
			GLY	1	0.0591716	2NO	2	0.0471809				CLA	1	0.0549753	6MR	3	0.043719							CO2	5	0.0129336							MSL	1	0.0205381	JKE	2	0.0129107	DCP	4	0.0096972	OPE	21	0.0106753
						QTT	2	0.0471809				OKP	1	0.0549753	67F	3	0.043719							DZ4	5	0.0129336							MLT	1	0.0205381	ADX	2	0.0129107	GB	4	0.0096972	PGU	21	0.0106753
						C6L	2	0.0471809				OAA	1	0.0549753	642	3	0.043719							CDL	5	0.0129336							MLA	1	0.0205381	RMN	2	0.0129107	IWD	4	0.0096972	SAL	21	0.0106753
						TYD	2	0.0471809				NLP	1	0.0549753	VAL	3	0.043719							TEO	5	0.0129336							MHI	1	0.0205381	FOA	2	0.0129107	ILE	4	0.0096972	SRM	20	0.0101669
						TV1	2	0.0471809				CTP	1	0.0549753	V28	3	0.043719							SVR	5	0.0129336							DCY	1	0.0205381	0SZ	2	0.0129107	ICT	4	0.0096972	MTX	20	0.0101669
						TTN	2	0.0471809				CUL	1	0.0549753	60M	3	0.043719							FAH	5	0.0129336							DDK	1	0.0205381	9RW	2	0.0129107	HIW	4	0.0096972	3GP	20	0.0101669
						TPO	2	0.0471809				ENL	1	0.0549753	URQ	3	0.043719							SRT	5	0.0129336							DDW	1	0.0205381	FLF	2	0.0129107	HIO	4	0.0096972	ACP	20	0.0101669
						TMP	2	0.0471809				CXM	1	0.0549753	UPG	3	0.043719							2HP	5	0.0129336							MET	1	0.0205381	MGD	2	0.0129107	H2S	4	0.0096972	BLA	20	0.0101669
						DQY	2	0.0471809				NHC	1	0.0549753	5OO	3	0.043719							SFG	5	0.0129336							DPO	1	0.0205381	SE5	2	0.0129107	GUA	4	0.0096972	E64	20	0.0101669
						SMN	2	0.0471809				NDP	1	0.0549753	C93	3	0.043719							BLA	5	0.0129336							00C	1	0.0205381	IOT	2	0.0129107	GTP	4	0.0096972	DAU	19	0.00965859
						DUD	2	0.0471809				D5M	1	0.0549753	576	3	0.043719							KDG	5	0.0129336										SFI	2	0.0129107	GSF	4	0.0096972	FDP	19	0.00965859
						CO2	2	0.0471809				DA	1	0.0549753	CHD	3	0.043719							GCO	5	0.0129336										CDC	2	0.0129107	GG1	4	0.0096972	BJ2	19	0.00965859
						FGP	2	0.0471809				NCD	1	0.0549753	TYR	3	0.043719							3DR	5	0.0129336										TRP	2	0.0129107	GFB	4	0.0096972	FOL	19	0.00965859
						C5P	2	0.0471809				MPH	1	0.0549753	CTP	3	0.043719							NPG	4	0.0103469										C2R	2	0.0129107	MX1	4	0.0096972	CDP	18	0.00915025
						EAL	2	0.0471809				DGI	1	0.0549753	KDZ	3	0.043719							TOL	4	0.0103469										C2U	2	0.0129107	N32	4	0.0096972	DHB	18	0.00915025
						EDA	2	0.0471809				MCR	1	0.0549753	PLU	3	0.043719							IRN	4	0.0103469										THR	2	0.0129107	PDC	4	0.0096972	ICT	18	0.00915025
						SER	2	0.0471809				0K7	1	0.0549753	GLV	3	0.043719							7FN	4	0.0103469										TTP	2	0.0129107	NFQ	4	0.0096972	PEP	18	0.00915025
						2HG	2	0.0471809							PAT	3	0.043719							R1P	4	0.0103469										HM8	2	0.0129107	NGQ	4	0.0096972	GTA	17	0.0086419
						BHR	2	0.0471809							NKN	3	0.043719							IHS	4	0.0103469										TGG	2	0.0129107	FEC	4	0.0096972	UD2	17	0.0086419
						AP2	2	0.0471809							NO9	3	0.043719							TYD	4	0.0103469										BLA	2	0.0129107	FAH	4	0.0096972	JHZ	17	0.0086419
						SAL	2	0.0471809							MLA	3	0.043719							PA8	4	0.0103469										BJL	2	0.0129107	NO9	4	0.0096972	UTP	17	0.0086419
						PHB	2	0.0471809							P9T	3	0.043719							N32	4	0.0103469										I84	2	0.0129107	EDT	4	0.0096972	DAL	17	0.0086419
						Q02	2	0.0471809							LYS	3	0.043719							DXG	4	0.0103469										2HG	2	0.0129107	DXL	4	0.0096972	ADA	16	0.00813355
						G88	2	0.0471809							PNK	3	0.043719							SDX	4	0.0103469										388	2	0.0129107	DOR	4	0.0096972	FCN	16	0.00813355
						NAD	2	0.0471809							LPR	3	0.043719							STP	4	0.0103469										BH2	2	0.0129107	DOE	4	0.0096972	GRG	16	0.00813355
						60M	2	0.0471809							PGA	3	0.043719							ACV	4	0.0103469										BE7	2	0.0129107	DHS	4	0.0096972	I3P	16	0.00813355
						7ML	2	0.0471809							C5P	2	0.029146							HDV	4	0.0103469										IDR	2	0.0129107	PAV	4	0.0096972	S0N	16	0.00813355
						LGT	2	0.0471809							NHC	2	0.029146							5MY	4	0.0103469										SRT	2	0.0129107	DGT	4	0.0096972	3DR	16	0.00813355
						MYR	2	0.0471809							PPY	2	0.029146							EDT	4	0.0103469										CGV	2	0.0129107	CAA	4	0.0096972	GTX	16	0.00813355
						ABT	2	0.0471809							B9N	2	0.029146							5GP	4	0.0103469										CHD	2	0.0129107	DAL	4	0.0096972	PLR	16	0.00813355
						L2D	2	0.0471809							CFM	2	0.029146							5CM	4	0.0103469										2CG	2	0.0129107	K0I	4	0.0096972	DMA	16	0.00813355
						NLP	2	0.0471809							NKO	2	0.029146							G4S	4	0.0103469										CYS	2	0.0129107	VRB	4	0.0096972	GB	16	0.00813355
						5OL	2	0.0471809							V24	2	0.029146							IMP	4	0.0103469										SLO	2	0.0129107	SRM	4	0.0096972	PP9	15	0.00762521
						NCO	2	0.0471809							BDS	2	0.029146							HH2	4	0.0103469										GDP	2	0.0129107	SFE	4	0.0096972	BDP	15	0.00762521
						CUV	2	0.0471809							BO3	2	0.029146							GOA	4	0.0103469										9O3	2	0.0129107	SDX	4	0.0096972	CYC	15	0.00762521
						L69	2	0.0471809							BQU	2	0.029146							ASG	4	0.0103469										PCX	2	0.0129107	SCR	4	0.0096972	OLA	15	0.00762521
						6PG	2	0.0471809							BYS	2	0.029146							XG4	4	0.0103469										NME	2	0.0129107	AM1	4	0.0096972	PD2	15	0.00762521
						PDC	2	0.0471809							NKQ	2	0.029146							BEM	4	0.0103469										PR6	2	0.0129107	S2X	4	0.0096972	PTR	15	0.00762521
						LMR	2	0.0471809							UGA	2	0.029146							PI	4	0.0103469										NDP	2	0.0129107	3PY	4	0.0096972	ADX	15	0.00762521
						NX6	2	0.0471809							BUA	2	0.029146							PML	4	0.0103469										NHE	2	0.0129107	AS1	4	0.0096972	C2E	15	0.00762521
						MUC	2	0.0471809							NKP	2	0.029146							LGT	4	0.0103469										4LU	2	0.0129107	AT1	4	0.0096972	8OG	15	0.00762521
						LMP	2	0.0471809							UNL	2	0.029146							PMM	4	0.0103469										PQQ	2	0.0129107	8VE	4	0.0096972	6PG	15	0.00762521
						ALS	2	0.0471809							C2C	2	0.029146							PMP	4	0.0103469										NPA	2	0.0129107	BR	4	0.0096972	GDS	15	0.00762521
						IOD	2	0.0471809							Q4I	2	0.029146							G3P	4	0.0103469										4P5	2	0.0129107	AVJ	4	0.0096972	FII	15	0.00762521
						PBE	2	0.0471809							MYR	2	0.029146							5IU	3	0.00776016										DGL	2	0.0129107	0JO	4	0.0096972	GDX	15	0.00762521
						4OP	2	0.0471809							DPP	2	0.029146							EL5	3	0.00776016										4WL	2	0.0129107	BYN	4	0.0096972	DG2	14	0.00711686
						6RP	2	0.0471809							E4T	2	0.029146							POA	3	0.00776016										7GR	2	0.0129107	BWD	4	0.0096972	152	14	0.00711686
						9ON	1	0.0235905							MCR	2	0.029146							EDA	3	0.00776016										DGY	2	0.0129107	BTN	4	0.0096972	THP	14	0.00711686
						1WB	1	0.0235905							E37	2	0.029146							DAL	3	0.00776016										ORP	2	0.0129107	UBP	4	0.0096972	A2P	14	0.00711686
						23J	1	0.0235905							E1S	2	0.029146							DAO	3	0.00776016										DZA	2	0.0129107	HCI	3	0.0072729	CSF	14	0.00711686
						CAP	1	0.0235905							E1C	2	0.029146							9BG	3	0.00776016										DXX	2	0.0129107	N81	3	0.0072729	DU	14	0.00711686
						7MK	1	0.0235905							T6Z	2	0.029146							5FA	3	0.00776016										PGD	2	0.0129107	N7T	3	0.0072729	CO2	14	0.00711686
						92K	1	0.0235905							TB6	2	0.029146							PQQ	3	0.00776016										PA8	2	0.0129107	TMP	3	0.0072729	LAC	14	0.00711686
						1OV	1	0.0235905							MED	2	0.029146							AZI	3	0.00776016										ZOM	2	0.0129107	THR	3	0.0072729	PHB	14	0.00711686
						1OU	1	0.0235905							UD1	2	0.029146							AF3	3	0.00776016										6NA	2	0.0129107	HDD	3	0.0072729	GTS	14	0.00711686
						CUK	1	0.0235905							DGL	2	0.029146							THR	3	0.00776016										PEQ	2	0.0129107	9FE	3	0.0072729	DPO	14	0.00711686
						0DB	1	0.0235905							MES	2	0.029146							A2P	3	0.00776016										DMG	2	0.0129107	LDT	3	0.0072729	CMX	14	0.00711686
						1OT	1	0.0235905							DCM	2	0.029146							8GD	3	0.00776016										EP0	2	0.0129107	HDV	3	0.0072729	DCS	14	0.00711686
						0FV	1	0.0235905							DAB	2	0.029146							88R	3	0.00776016										TNA	2	0.0129107	SUO	3	0.0072729	TOL	14	0.00711686
						0A1	1	0.0235905							D6N	2	0.029146							A3P	3	0.00776016										PTR	2	0.0129107	NMN	3	0.0072729	D0W	13	0.00660851
						COI	1	0.0235905							CYK	2	0.029146							M7G	3	0.00776016										0PJ	2	0.0129107	SNW	3	0.0072729	UDH	13	0.00660851
						0ZN	1	0.0235905							TWB	2	0.029146							WAQ	3	0.00776016										EPU	2	0.0129107	1AC	3	0.0072729	DXP	13	0.00660851
						88B	1	0.0235905							B22	2	0.029146							MDN	3	0.00776016										MSS	2	0.0129107	HF4	3	0.0072729	IPM	13	0.00660851
						CLP	1	0.0235905							NX6	2	0.029146							DDN	3	0.00776016										N1L	2	0.0129107	MAH	3	0.0072729	FAH	13	0.00660851
						1OS	1	0.0235905							ATP	2	0.029146							VRB	3	0.00776016										9NO	2	0.0129107	5YQ	3	0.0072729	ALF	13	0.00660851
						CSN	1	0.0235905							PD2	2	0.029146							VOV	3	0.00776016										MPO	2	0.0129107	LY5	3	0.0072729	544	13	0.00660851
						6QQ	1	0.0235905							5AB	2	0.029146							173	3	0.00776016										MP2	2	0.0129107	FLU	3	0.0072729	9BG	13	0.00660851
						0JC	1	0.0235905							58Z	2	0.029146							PYC	3	0.00776016										0HV	1	0.00645536	MAW	3	0.0072729	HDV	13	0.00660851
						1HN	1	0.0235905							4U7	2	0.029146							UNL	3	0.00776016										04E	1	0.00645536	ENO	3	0.0072729	PDC	13	0.00660851
						0K7	1	0.0235905							3S3	2	0.029146							UMP	3	0.00776016										0ZN	1	0.00645536	8UX	3	0.0072729	PPF	13	0.00660851
						7QD	1	0.0235905							3R9	2	0.029146							GCD	3	0.00776016										DHE	1	0.00645536	NCN	3	0.0072729	GPJ	13	0.00660851
						1GP	1	0.0235905							3FB	2	0.029146							CN6	3	0.00776016										DHY	1	0.00645536	TPP	3	0.0072729	VCA	12	0.00610016
						19N	1	0.0235905							37E	2	0.029146							UD2	3	0.00776016										0V5	1	0.00645536	E1C	3	0.0072729	DUT	12	0.00610016
						0KX	1	0.0235905							2X0	2	0.029146							UD1	3	0.00776016										CCK	1	0.00645536	8YL	3	0.0072729	PEE	12	0.00610016
						0O2	1	0.0235905							1UC	2	0.029146							CN3	3	0.00776016										DKS	1	0.00645536	HC4	3	0.0072729	K26	12	0.00610016
						8BR	1	0.0235905							VKE	2	0.029146							0KX	3	0.00776016										0PI	1	0.00645536	2CG	3	0.0072729	ZZ7	12	0.00610016
						3PG	1	0.0235905							1OV	2	0.029146							BDP	3	0.00776016										DIF	1	0.00645536	OLA	3	0.0072729	SCR	12	0.00610016
						25P	1	0.0235905							1EE	2	0.029146							GTF	3	0.00776016										DA3	1	0.00645536	DKA	3	0.0072729	LDT	12	0.00610016
						BZS	1	0.0235905							19N	2	0.029146							OSB	3	0.00776016										BY0	1	0.00645536	247	3	0.0072729	D3T	12	0.00610016
						37E	1	0.0235905							XJE	2	0.029146							PD2	3	0.00776016										DKV	1	0.00645536	GG6	3	0.0072729	DAO	12	0.00610016
						B21	1	0.0235905							0RV	2	0.029146							G6P	3	0.00776016										C7C	1	0.00645536	H1S	3	0.0072729	2PG	12	0.00610016
						60N	1	0.0235905							0RM	2	0.029146							GPP	3	0.00776016										DLJ	1	0.00645536	HF7	3	0.0072729	IHS	11	0.00559182
						3C7	1	0.0235905							0QI	2	0.029146							SKP	3	0.00776016										0SL	1	0.00645536	DHY	3	0.0072729	A8S	11	0.00559182
						3E9	1	0.0235905							0ED	2	0.029146							SMG	3	0.00776016										137	1	0.00645536	7MT	3	0.0072729	PRP	11	0.00559182
						5HR	1	0.0235905							5HR	2	0.029146							SPQ	3	0.00776016										CDL	1	0.00645536	PPI	3	0.0072729	BG6	11	0.00559182
						3FB	1	0.0235905							5ON	2	0.029146							2HE	3	0.00776016										DAS	1	0.00645536	PYC	3	0.0072729	PPY	11	0.00559182
						3HA	1	0.0235905							P60	2	0.029146							SSN	3	0.00776016										08A	1	0.00645536	PL6	3	0.0072729	EPS	11	0.00559182
						5CU	1	0.0235905							60N	2	0.029146							OXD	3	0.00776016										DAR	1	0.00645536	GCD	3	0.0072729	PPK	11	0.00559182
						3HB	1	0.0235905							EEG	2	0.029146							PP3	3	0.00776016										0L1	1	0.00645536	GCU	3	0.0072729	AVJ	11	0.00559182
						58Z	1	0.0235905							APC	2	0.029146							HF4	3	0.00776016										DBH	1	0.00645536	ITA	3	0.0072729	NSQ	11	0.00559182
						AKR	1	0.0235905							ALA	2	0.029146							KPC	3	0.00776016										1FC	1	0.00645536	GTF	3	0.0072729	CRN	11	0.00559182
						ALA	1	0.0235905							ADP	2	0.029146							2BO	3	0.00776016										1U4	1	0.00645536	UBA	3	0.0072729	13P	11	0.00559182
						ARG	1	0.0235905							WQS	2	0.029146							HF7	3	0.00776016										DBS	1	0.00645536	PPD	3	0.0072729	GPP	11	0.00559182
						APR	1	0.0235905							PPI	2	0.029146							PO3	3	0.00776016										CIR	1	0.00645536	BEF	3	0.0072729	CA2	11	0.00559182
						4BQ	1	0.0235905							ACP	2	0.029146							PDD	3	0.00776016										CPS	1	0.00645536	KCH	3	0.0072729	MYA	11	0.00559182
						3PY	1	0.0235905							POP	2	0.029146							SV7	3	0.00776016										0PQ	1	0.00645536	GGL	3	0.0072729	HF7	11	0.00559182
						61M	1	0.0235905							9YD	2	0.029146							HEJ	3	0.00776016										1WX	1	0.00645536	KC1	3	0.0072729	DG3	11	0.00559182
						2X0	1	0.0235905							7SX	2	0.029146							9PP	2	0.00517344										0DB	1	0.00645536	IMN	3	0.0072729	8DG	11	0.00559182
						B4N	1	0.0235905							7MF	2	0.029146							BHC	2	0.00517344										2AN	1	0.00645536	MTG	3	0.0072729	M7G	11	0.00559182
						A04	1	0.0235905							7IA	2	0.029146							9PI	2	0.00517344										2BA	1	0.00645536	S2P	3	0.0072729	H2S	11	0.00559182
						9YH	1	0.0235905							6M4	2	0.029146							FKS	2	0.00517344										DAO	1	0.00645536	KGT	3	0.0072729	TEO	11	0.00559182
						9YK	1	0.0235905							6LD	2	0.029146							ITP	2	0.00517344										2BO	1	0.00645536	UGB	3	0.0072729	PDD	11	0.00559182
						28P	1	0.0235905							OTD	2	0.029146							BE2	2	0.00517344										DAL	1	0.00645536	3NG	3	0.0072729	PA5	11	0.00559182
						BO3	1	0.0235905							PNN	2	0.029146							ASB	2	0.00517344										DAB	1	0.00645536	3HB	3	0.0072729	XYH	10	0.00508347
						2HE	1	0.0235905							61M	2	0.029146							GP1	2	0.00517344										DCP	1	0.00645536	ABU	3	0.0072729	ET1	10	0.00508347
						6MW	1	0.0235905							EAL	2	0.029146							D1X	2	0.00517344										DEA	1	0.00645536	10G	3	0.0072729	0GY	10	0.00508347
						6LD	1	0.0235905							C6L	2	0.029146							A2M	2	0.00517344										0PK	1	0.00645536	JTA	3	0.0072729	BEM	10	0.00508347
						BES	1	0.0235905							INH	2	0.029146							BLR	2	0.00517344										B6X	1	0.00645536	U5P	3	0.0072729	HAR	10	0.00508347
						2WW	1	0.0235905							M74	2	0.029146							JTA	2	0.00517344										2HP	1	0.00645536	HOH	3	0.0072729	U2P	10	0.00508347
						A05	1	0.0235905							M72	2	0.029146							DDH	2	0.00517344										8A1	1	0.00645536	MS8	3	0.0072729	HE3	10	0.00508347
						2HP	1	0.0235905							LSW	2	0.029146							G4P	2	0.00517344										8KN	1	0.00645536	I3P	3	0.0072729	FPS	10	0.00508347
						2K8	1	0.0235905							HJB	2	0.029146							GNY	2	0.00517344										8L2	1	0.00645536	PDG	3	0.0072729	16G	10	0.00508347
						2KH	1	0.0235905							SAH	2	0.029146							K8Y	2	0.00517344										8LB	1	0.00645536	SEP	3	0.0072729	PPG	10	0.00508347
						A18	1	0.0235905							HJ7	2	0.029146							9VH	2	0.00517344										DMX	1	0.00645536	BJL	3	0.0072729	5CM	10	0.00508347
						A8S	1	0.0235905							IO2	2	0.029146							GNV	2	0.00517344										8XQ	1	0.00645536	2WB	2	0.0048486	GAD	10	0.00508347
						2TM	1	0.0235905							RSS	2	0.029146							BHZ	2	0.00517344										8YV	1	0.00645536	30L	2	0.0048486	API	10	0.00508347
						BYA	1	0.0235905							S8A	2	0.029146							DCT	2	0.00517344										95B	1	0.00645536	GTB	2	0.0048486	GOA	10	0.00508347
						ZAN	1	0.0235905							LHT	2	0.029146							K8D	2	0.00517344										9CJ	1	0.00645536	40F	2	0.0048486	AF3	10	0.00508347
						CYC	1	0.0235905							RAT	2	0.029146							DCC	2	0.00517344										9FQ	1	0.00645536	GM7	2	0.0048486	G6P	10	0.00508347
						NYZ	1	0.0235905							KED	2	0.029146							K8G	2	0.00517344										9NL	1	0.00645536	GS8	2	0.0048486	CKP	10	0.00508347
						PPY	1	0.0235905							HEC	2	0.029146							K8J	2	0.00517344										4HF	1	0.00645536	GOP	2	0.0048486	DDZ	10	0.00508347
						PMM	1	0.0235905							HE8	2	0.029146							K8V	2	0.00517344										429	1	0.00645536	GOG	2	0.0048486	TFA	10	0.00508347
						PLU	1	0.0235905							YKG	2	0.029146							G3H	2	0.00517344										3PY	1	0.00645536	35M	2	0.0048486	CAX	10	0.00508347
						PHI	1	0.0235905							KAW	2	0.029146							HI5	2	0.00517344										3O3	1	0.00645536	GHM	2	0.0048486	MGT	10	0.00508347
						PGA	1	0.0235905							GTQ	2	0.029146							GTA	2	0.00517344										9O0	1	0.00645536	393	2	0.0048486	UOQ	10	0.00508347
						PEP	1	0.0235905							GTV	2	0.029146							I5P	2	0.00517344										8G0	1	0.00645536	3DS	2	0.0048486	DOC	10	0.00508347
						PCG	1	0.0235905							HDL	2	0.029146							AIR	2	0.00517344										89V	1	0.00645536	GJS	2	0.0048486	DGL	10	0.00508347
						PC4	1	0.0235905							H9E	2	0.029146							ADX	2	0.00517344										9RH	1	0.00645536	3JL	2	0.0048486	MPO	9	0.00457512
						PBC	1	0.0235905							KAF	2	0.029146							C2F	2	0.00517344										876	1	0.00645536	GLV	2	0.0048486	G4S	9	0.00457512
						OCA	1	0.0235905							HB8	2	0.029146							AJH	2	0.00517344										6OG	1	0.00645536	GNV	2	0.0048486	PPI	9	0.00457512
						O2T	1	0.0235905							RU7	2	0.029146							F6R	2	0.00517344										6UN	1	0.00645536	3EA	2	0.0048486	AS1	9	0.00457512
						O1T	1	0.0235905							HCH	2	0.029146							HP5	2	0.00517344										6XO	1	0.00645536	GNJ	2	0.0048486	AMZ	9	0.00457512
						O05	1	0.0235905							RBN	2	0.029146							BCN	2	0.00517344										6Z1	1	0.00645536	GNY	2	0.0048486	1AL	9	0.00457512
						O02	1	0.0235905							HCQ	2	0.029146							FCN	2	0.00517344										6KB	1	0.00645536	H77	2	0.0048486	DP6	9	0.00457512
						NTM	1	0.0235905							HT7	2	0.029146							GLV	2	0.00517344										75V	1	0.00645536	2W9	2	0.0048486	ACD	9	0.00457512
						M3P	1	0.0235905							L88	2	0.029146							HCT	2	0.00517344										5P3	1	0.00645536	ID5	2	0.0048486	UAP	9	0.00457512
						NTA	1	0.0235905							KSN	2	0.029146							DWQ	2	0.00517344										5H9	1	0.00645536	16G	2	0.0048486	C3P	9	0.00457512
						NRD	1	0.0235905							L3A	2	0.029146							DUT	2	0.00517344										78A	1	0.00645536	13P	2	0.0048486	IRN	9	0.00457512
						NIG	1	0.0235905							FUJ	2	0.029146							ALF	2	0.00517344										5H8	1	0.00645536	HMG	2	0.0048486	2SA	9	0.00457512
						NHE	1	0.0235905							SRT	2	0.029146							HCI	2	0.00517344										58X	1	0.00645536	10E	2	0.0048486	A12	9	0.00457512
						NG6	1	0.0235905							L04	2	0.029146							I6P	2	0.00517344										7A2	1	0.00645536	I6P	2	0.0048486	HF4	9	0.00457512
						NDP	1	0.0235905							FC6	2	0.029146							IPR	2	0.00517344										511	1	0.00645536	I84	2	0.0048486	TQP	9	0.00457512
						N1T	1	0.0235905							REL	2	0.029146							FDA	2	0.00517344										7K0	1	0.00645536	IBS	2	0.0048486	CMC	9	0.00457512
						MPH	1	0.0235905							HVS	2	0.029146							DSN	2	0.00517344										4TA	1	0.00645536	0WO	2	0.0048486	PGD	9	0.00457512
						MOS	1	0.0235905							FIN	2	0.029146							IDR	2	0.00517344										9O6	1	0.00645536	ID8	2	0.0048486	UMP	9	0.00457512
						MLA	1	0.0235905							FIX	2	0.029146							FDE	2	0.00517344										3NM	1	0.00645536	GTR	2	0.0048486	LPR	9	0.00457512
						MGT	1	0.0235905							5CU	1	0.014573							GTX	2	0.00517344										2IT	1	0.00645536	0SZ	2	0.0048486	AHG	9	0.00457512
						MFJ	1	0.0235905							QR4	1	0.014573							GTS	2	0.00517344										36C	1	0.00645536	IHS	2	0.0048486	2HE	9	0.00457512
						MF3	1	0.0235905							XA1	1	0.014573							GTQ	2	0.00517344										B28	1	0.00645536	0RY	2	0.0048486	UGA	9	0.00457512
						MAE	1	0.0235905							ORS	1	0.014573							IMN	2	0.00517344										B29	1	0.00645536	0RV	2	0.0048486	BCN	9	0.00457512
						PRO	1	0.0235905							QZK	1	0.014573							ZST	2	0.00517344										35M	1	0.00645536	0HV	2	0.0048486	EDT	9	0.00457512
						Q03	1	0.0235905							7ML	1	0.014573							IMO	2	0.00517344										6OA	1	0.00645536	IZP	2	0.0048486	SUZ	8	0.00406678
						Q04	1	0.0235905							7QD	1	0.014573							EQJ	2	0.00517344										BAL	1	0.00645536	JKE	2	0.0048486	3HA	8	0.00406678
						Q06	1	0.0235905							K9K	1	0.014573							COM	2	0.00517344										2RD	1	0.00645536	JQZ	2	0.0048486	D0Z	8	0.00406678
						YYY	1	0.0235905							ICE	1	0.014573							BRU	2	0.00517344										BDH	1	0.00645536	HEJ	2	0.0048486	SDX	8	0.00406678
						XXG	1	0.0235905							P8D	1	0.014573							DIU	2	0.00517344										BHN	1	0.00645536	1HA	2	0.0048486	G88	8	0.00406678
						X95	1	0.0235905							88B	1	0.014573							GKR	2	0.00517344										BHZ	1	0.00645536	1N4	2	0.0048486	N32	8	0.00406678
						X94	1	0.0235905							8HC	1	0.014573							GTG	2	0.00517344										BIP	1	0.00645536	1NT	2	0.0048486	ACB	8	0.00406678
						X93	1	0.0235905							8OM	1	0.014573							PPY	2	0.00517344										2NP	1	0.00645536	GTS	2	0.0048486	OXD	8	0.00406678
						X92	1	0.0235905							7MK	1	0.014573							PCA	2	0.00517344										BR0	1	0.00645536	2W8	2	0.0048486	GTG	8	0.00406678
						WCC	1	0.0235905							P5D	1	0.014573							25L	2	0.00517344										2MG	1	0.00645536	2PG	2	0.0048486	GPR	8	0.00406678
						VNR	1	0.0235905							R29	1	0.014573							PAU	2	0.00517344										BTO	1	0.00645536	2JJ	2	0.0048486	OMU	8	0.00406678
						VII	1	0.0235905							X94	1	0.014573							TDL	2	0.00517344										BUA	1	0.00645536	H5Y	2	0.0048486	PO3	8	0.00406678
						URP	1	0.0235905							ICZ	1	0.014573							PAC	2	0.00517344										AW5	1	0.00645536	H61	2	0.0048486	DZ4	8	0.00406678
						U5P	1	0.0235905							6C1	1	0.014573							TDO	2	0.00517344										ASJ	1	0.00645536	H67	2	0.0048486	UDX	8	0.00406678
						U3H	1	0.0235905							6PC	1	0.014573							P9C	2	0.00517344										3LA	1	0.00645536	H6A	2	0.0048486	HEJ	8	0.00406678
						TYR	1	0.0235905							X95	1	0.014573							P3M	2	0.00517344										38C	1	0.00645536	H6G	2	0.0048486	HXG	8	0.00406678
						TNV	1	0.0235905							6QQ	1	0.014573							522	2	0.00517344										A3P	1	0.00645536	H6J	2	0.0048486	CXA	8	0.00406678
						THR	1	0.0235905							55L	1	0.014573							53N	2	0.00517344										AAE	1	0.00645536	H6M	2	0.0048486	2AN	8	0.00406678
						TBR	1	0.0235905							OPE	1	0.014573							ORO	2	0.00517344										3HL	1	0.00645536	H6V	2	0.0048486	792	8	0.00406678
						SL6	1	0.0235905							JKE	1	0.014573							OPE	2	0.00517344										3HB	1	0.00645536	H74	2	0.0048486	HAS	8	0.00406678
						SKZ	1	0.0235905							61O	1	0.014573							OLA	2	0.00517344										3HA	1	0.00645536	24G	2	0.0048486	2AM	8	0.00406678
						SIM	1	0.0235905							RC4	1	0.014573							OGA	2	0.00517344										3G1	1	0.00645536	HA7	2	0.0048486	GDN	8	0.00406678
						SHT	1	0.0235905							60Q	1	0.014573							5BU	2	0.00517344										AGS	1	0.00645536	1YE	2	0.0048486	5FA	8	0.00406678
						SGN	1	0.0235905							60P	1	0.014573							OBV	2	0.00517344										3FL	1	0.00645536	1WX	2	0.0048486	PE1	8	0.00406678
						SDF	1	0.0235905							ICG	1	0.014573							O77	2	0.00517344										3DS	1	0.00645536	48I	2	0.0048486	MX1	8	0.00406678
						S7B	1	0.0235905							P4D	1	0.014573							O3Z	2	0.00517344										3DR	1	0.00645536	C1X	2	0.0048486	HCI	8	0.00406678
						S3B	1	0.0235905							ENO	1	0.014573							NTA	2	0.00517344										3CR	1	0.00645536	4E5	2	0.0048486	2M8	8	0.00406678
						S2G	1	0.0235905							48H	1	0.014573							NSQ	2	0.00517344										ANN	1	0.00645536	DOY	2	0.0048486	MTE	8	0.00406678
						QDH	1	0.0235905							4TF	1	0.014573							THP	2	0.00517344										ANP	1	0.00645536	DHC	2	0.0048486	PAU	8	0.00406678
						QCQ	1	0.0235905							2BA	1	0.014573							NHE	2	0.00517344										AOT	1	0.00645536	AC5	2	0.0048486	DXG	8	0.00406678
						Q08	1	0.0235905							25P	1	0.014573							1W9	2	0.00517344										3A5	1	0.00645536	ABH	2	0.0048486	PAM	8	0.00406678
						Q07	1	0.0235905							PEP	1	0.014573							TP4	2	0.00517344										ZZ7	1	0.00645536	DK1	2	0.0048486	LMP	8	0.00406678
						M3S	1	0.0235905							KOP	1	0.014573							PBU	2	0.00517344										GTF	1	0.00645536	DKP	2	0.0048486	PL2	8	0.00406678
						M36	1	0.0235905							1OU	1	0.014573							48Y	2	0.00517344										DN4	1	0.00645536	AAE	2	0.0048486	I6P	8	0.00406678
						CYS	1	0.0235905							1OT	1	0.014573							NCD	2	0.00517344										PAF	1	0.00645536	A3P	2	0.0048486	IN5	8	0.00406678
						DZ4	1	0.0235905							PEQ	1	0.014573							PE1	2	0.00517344										PBG	1	0.00645536	DOF	2	0.0048486	OCA	8	0.00406678
						GKR	1	0.0235905							1HN	1	0.014573							393	2	0.00517344										PCA	1	0.00645536	DOQ	2	0.0048486	1PS	8	0.00406678
						GCO	1	0.0235905							1GP	1	0.014573							3AT	2	0.00517344										PDG	1	0.00645536	DPR	2	0.0048486	BUA	8	0.00406678
						ZA4	1	0.0235905							KVP	1	0.014573							3CP	2	0.00517344										PEZ	1	0.00645536	AF3	2	0.0048486	ANP	8	0.00406678
						FSX	1	0.0235905							XC3	1	0.014573							2SA	2	0.00517344										PGA	1	0.00645536	DQG	2	0.0048486	FGA	8	0.00406678
						FDF	1	0.0235905							KYK	1	0.014573							S37	2	0.00517344										PHT	1	0.00645536	9ON	2	0.0048486	MLC	8	0.00406678
						FCD	1	0.0235905							113	1	0.014573							S3P	2	0.00517344										PIV	1	0.00645536	DQY	2	0.0048486	EL5	8	0.00406678
						FC2	1	0.0235905							L4Z	1	0.014573							3EB	2	0.00517344										PKG	1	0.00645536	DSB	2	0.0048486	ZST	8	0.00406678
						FAD	1	0.0235905							LAC	1	0.014573							2PG	2	0.00517344										PLM	1	0.00645536	9FJ	2	0.0048486	F	8	0.00406678
						EPE	1	0.0235905							0K7	1	0.014573							SCD	2	0.00517344										PLP	1	0.00645536	9DX	2	0.0048486	IMN	8	0.00406678
						ENL	1	0.0235905							LCP	1	0.014573							2OP	2	0.00517344										PP9	1	0.00645536	9DJ	2	0.0048486	AR6	8	0.00406678
						ELH	1	0.0235905							0A1	1	0.014573							SGN	2	0.00517344										PPD	1	0.00645536	DU	2	0.0048486	NMN	8	0.00406678
						EFS	1	0.0235905							PHB	1	0.014573							SIR	2	0.00517344										PPI	1	0.00645536	9CJ	2	0.0048486	PQJ	8	0.00406678
						E5N	1	0.0235905							YI6	1	0.014573							SLT	2	0.00517344										PPV	1	0.00645536	ADX	2	0.0048486	MCN	7	0.00355843
						E4T	1	0.0235905							PDC	1	0.014573							PPI	2	0.00517344										PQT	1	0.00645536	DGL	2	0.0048486	QSP	7	0.00355843
						DUT	1	0.0235905							KMH	1	0.014573							PPF	2	0.00517344										PRU	1	0.00645536	4MJ	2	0.0048486	0FX	7	0.00355843
						LSW	1	0.0235905							4TE	1	0.014573							2FP	2	0.00517344										PSF	1	0.00645536	BHZ	2	0.0048486	SKM	7	0.00355843
						DTH	1	0.0235905							2HG	1	0.014573							SSS	2	0.00517344										PT5	1	0.00645536	C5A	2	0.0048486	GUA	7	0.00355843
						DPP	1	0.0235905							4BW	1	0.014573							2CO	2	0.00517344										PVC	1	0.00645536	C5P	2	0.0048486	U3P	7	0.00355843
						DPN	1	0.0235905							4BQ	1	0.014573							STE	2	0.00517344										QIC	1	0.00645536	BZS	2	0.0048486	K6H	7	0.00355843
						DOI	1	0.0235905							8WV	1	0.014573							PHB	2	0.00517344										QM1	1	0.00645536	BZJ	2	0.0048486	V1S	7	0.00355843
						DND	1	0.0235905							41K	1	0.014573							PGV	2	0.00517344										PAY	1	0.00645536	CG8	2	0.0048486	BO3	7	0.00355843
						DGS	1	0.0235905							3X1	1	0.014573							SUZ	2	0.00517344										PAE	1	0.00645536	CIR	2	0.0048486	UN9	7	0.00355843
						DGL	1	0.0235905							QVE	1	0.014573							T26	2	0.00517344										MK4	1	0.00645536	BRU	2	0.0048486	8SP	7	0.00355843
						DCM	1	0.0235905							QRA	1	0.014573							1FZ	2	0.00517344										PAC	1	0.00645536	BO3	2	0.0048486	DQY	7	0.00355843
						DAS	1	0.0235905							3P7	1	0.014573							30L	2	0.00517344										MTV	1	0.00645536	CTK	2	0.0048486	SVR	7	0.00355843
						DAL	1	0.0235905							3HB	1	0.014573							TRH	2	0.00517344										MTX	1	0.00645536	BG6	2	0.0048486	NKN	7	0.00355843
						DAB	1	0.0235905							3HA	1	0.014573							UMA	2	0.00517344										MYZ	1	0.00645536	AKR	2	0.0048486	PEF	7	0.00355843
						D8T	1	0.0235905							PNM	1	0.014573							M6P	2	0.00517344										N4N	1	0.00645536	CWD	2	0.0048486	THG	7	0.00355843
						D5M	1	0.0235905							38I	1	0.014573							W7E	2	0.00517344										N5Q	1	0.00645536	B1O	2	0.0048486	GEK	7	0.00355843
						D38	1	0.0235905							2XP	1	0.014573							M6D	2	0.00517344										N72	1	0.00645536	B0X	2	0.0048486	9VH	7	0.00355843
						GNP	1	0.0235905							KKE	1	0.014573							VSV	2	0.00517344										N7T	1	0.00645536	D0Q	2	0.0048486	R1P	7	0.00355843
						GP9	1	0.0235905							2WW	1	0.014573							6HY	2	0.00517344										N81	1	0.00645536	AUY	2	0.0048486	DI	7	0.00355843
						GST	1	0.0235905							KKH	1	0.014573							88V	2	0.00517344										NCN	1	0.00645536	K5Q	2	0.0048486	BET	7	0.00355843
						HA0	1	0.0235905							2PG	1	0.014573							MGD	2	0.00517344										NFL	1	0.00645536	DAO	2	0.0048486	DDS	7	0.00355843
						LPJ	1	0.0235905							2KQ	1	0.014573							LHG	2	0.00517344										NFQ	1	0.00645536	DAR	2	0.0048486	2OP	7	0.00355843
						LFH	1	0.0235905							KL5	1	0.014573							MGT	2	0.00517344										NMN	1	0.00645536	AKZ	2	0.0048486	MGM	7	0.00355843
						LFC	1	0.0235905							8P8	1	0.014573							6RP	2	0.00517344										NPX	1	0.00645536	9BZ	2	0.0048486	DDN	7	0.00355843
						LAC	1	0.0235905							HPI	1	0.014573							MN0	2	0.00517344										NRI	1	0.00645536	DXP	2	0.0048486	N72	7	0.00355843
						LA6	1	0.0235905							OLA	1	0.014573							MNH	2	0.00517344										NTM	1	0.00645536	DXX	2	0.0048486	FOM	7	0.00355843
						L5E	1	0.0235905							QR1	1	0.014573							LAC	2	0.00517344										NWG	1	0.00645536	FSQ	2	0.0048486	10E	7	0.00355843
						L4Z	1	0.0235905							DAO	1	0.014573							MNR	2	0.00517344										OCA	1	0.00645536	6PC	2	0.0048486	GTF	7	0.00355843
						L4D	1	0.0235905							TBR	1	0.014573							0SG	2	0.00517344										OL2	1	0.00645536	FLF	2	0.0048486	DKA	7	0.00355843
						L2M	1	0.0235905							GAE	1	0.014573							93A	2	0.00517344										OTD	1	0.00645536	6NA	2	0.0048486	T6F	7	0.00355843
						KYW	1	0.0235905							D6K	1	0.014573							18T	2	0.00517344										P2S	1	0.00645536	6EP	2	0.0048486	8GT	7	0.00355843
						KYK	1	0.0235905							D5M	1	0.014573							U5P	2	0.00517344										PAB	1	0.00645536	6EO	2	0.0048486	ZNH	7	0.00355843
						KSN	1	0.0235905							QDH	1	0.014573							L69	2	0.00517344										QZQ	1	0.00645536	6EN	2	0.0048486	DPF	7	0.00355843
						KIV	1	0.0235905							D0U	1	0.014573							UAP	2	0.00517344										R57	1	0.00645536	C2E	2	0.0048486	NRG	7	0.00355843
						KAW	1	0.0235905							TQI	1	0.014573							ZOM	2	0.00517344										R58	1	0.00645536	FSA	2	0.0048486	BZS	7	0.00355843
						KAF	1	0.0235905							GCP	1	0.014573							6LM	2	0.00517344										RAT	1	0.00645536	FSI	2	0.0048486	PPE	7	0.00355843
						JSQ	1	0.0235905							TU0	1	0.014573							ZNH	2	0.00517344										UBT	1	0.00645536	5TZ	2	0.0048486	7BC	7	0.00355843
						JAA	1	0.0235905							CUP	1	0.014573							MTX	2	0.00517344										UBV	1	0.00645536	DYA	2	0.0048486	OXQ	7	0.00355843
						IPR	1	0.0235905							QCQ	1	0.014573							2CT	1	0.00258672										UBW	1	0.00645536	5OM	2	0.0048486	5RP	7	0.00355843
						IHP	1	0.0235905							CS2	1	0.014573							0KG	1	0.00258672										UBY	1	0.00645536	G3P	2	0.0048486	PHS	7	0.00355843
						ICZ	1	0.0235905							S7B	1	0.014573							0KB	1	0.00258672										UBZ	1	0.00645536	G8M	2	0.0048486	DAD	7	0.00355843
						ICE	1	0.0235905							COI	1	0.014573							0KH	1	0.00258672										UGC	1	0.00645536	5FA	2	0.0048486	PPS	6	0.00305008
						HXD	1	0.0235905							S3C	1	0.014573							04M	1	0.00258672										UV8	1	0.00645536	GAB	2	0.0048486	7SV	6	0.00305008
						HVS	1	0.0235905							GLN	1	0.014573							2DT	1	0.00258672										VAO	1	0.00645536	53N	2	0.0048486	PL6	6	0.00305008
						HT7	1	0.0235905							PYR	1	0.014573							2WQ	1	0.00258672										VJJ	1	0.00645536	GDD	2	0.0048486	88N	6	0.00305008
						HPI	1	0.0235905							S3B	1	0.014573							2WR	1	0.00258672										W8X	1	0.00645536	GDN	2	0.0048486	GTR	6	0.00305008
						HIS	1	0.0235905							DAS	1	0.014573							BW9	1	0.00258672										X32	1	0.00645536	4SV	2	0.0048486	7UA	6	0.00305008
						HEJ	1	0.0235905							TBL	1	0.014573							2X9	1	0.00258672										XK3	1	0.00645536	FHL	2	0.0048486	GNP	6	0.00305008
						HEC	1	0.0235905							CFO	1	0.014573							0KC	1	0.00258672										XPO	1	0.00645536	6PG	2	0.0048486	PL4	6	0.00305008
						HCM	1	0.0235905							PNF	1	0.014573							CSN	1	0.00258672										XXC	1	0.00645536	FER	2	0.0048486	7T1	6	0.00305008
						01B	1	0.0235905							EIN	1	0.014573							0HV	1	0.00258672										Y22	1	0.00645536	FDE	2	0.0048486	7SG	6	0.00305008
															EFS	1	0.014573							BUJ	1	0.00258672										YC8	1	0.00645536	DYH	2	0.0048486	PML	6	0.00305008
															EOT	1	0.014573							2HZ	1	0.00258672										YTX	1	0.00645536	DYV	2	0.0048486	7N5	6	0.00305008
															MBS	1	0.014573							2K8	1	0.00258672										YZS	1	0.00645536	E91	2	0.0048486	PP3	6	0.00305008
															FCN	1	0.014573							2M9	1	0.00258672										Z3P	1	0.00645536	EL5	2	0.0048486	7SS	6	0.00305008
															E3D	1	0.014573							0GA	1	0.00258672										Z98	1	0.00645536	8TW	2	0.0048486	86A	6	0.00305008
															FEG	1	0.014573							0FV	1	0.00258672										ZD2	1	0.00645536	EMS	2	0.0048486	HWU	6	0.00305008
															FGL	1	0.014573							0R8	1	0.00258672										UBS	1	0.00645536	EOT	2	0.0048486	PI	6	0.00305008
															DWY	1	0.014573							051	1	0.00258672										UB3	1	0.00645536	EP1	2	0.0048486	DAS	6	0.00305008
															DUP	1	0.014573							2PH	1	0.00258672										UB2	1	0.00645536	8EP	2	0.0048486	EIP	6	0.00305008
															MCT	1	0.014573							2UV	1	0.00258672										SH0	1	0.00645536	EQJ	2	0.0048486	EFS	6	0.00305008
															DTH	1	0.014573							2RD	1	0.00258672										RES	1	0.00645536	F	2	0.0048486	EDA	6	0.00305008
															SV7	1	0.014573							CV0	1	0.00258672										RG2	1	0.00645536	F42	2	0.0048486	EAL	6	0.00305008
															DQM	1	0.014573							BLG	1	0.00258672										RX4	1	0.00645536	8DX	2	0.0048486	DXX	6	0.00305008
															MD3	1	0.014573							0UM	1	0.00258672										S2G	1	0.00645536	7WH	2	0.0048486	N	6	0.00305008
															SHV	1	0.014573							BZB	1	0.00258672										S44	1	0.00645536	7SG	2	0.0048486	COH	6	0.00305008
															M8O	1	0.014573							1WB	1	0.00258672										SAR	1	0.00645536	F6G	2	0.0048486	BLR	6	0.00305008
															SFR	1	0.014573							188	1	0.00258672										SEP	1	0.00645536	7FC	2	0.0048486	IPR	6	0.00305008
															FPM	1	0.014573							CB3	1	0.00258672										SFG	1	0.00645536	FC6	2	0.0048486	BMP	6	0.00305008
															CIL	1	0.014573							1WX	1	0.00258672										SGN	1	0.00645536	6Z1	2	0.0048486	MNH	6	0.00305008
															M3S	1	0.014573							CCH	1	0.00258672										SME	1	0.00645536	6ED	2	0.0048486	MIS	6	0.00305008
															X93	1	0.014573							2YZ	1	0.00258672										U3P	1	0.00645536	00C	2	0.0048486	BZJ	6	0.00305008
															VPD	1	0.014573							CDH	1	0.00258672										SMN	1	0.00645536	SHF	2	0.0048486	DHF	6	0.00305008
															AP2	1	0.014573							CDP	1	0.00258672										SQD	1	0.00645536	V67	2	0.0048486	MD1	6	0.00305008
															VPM	1	0.014573							2CL	1	0.00258672										SSC	1	0.00645536	MED	2	0.0048486	M6P	6	0.00305008
															ALS	1	0.014573							1CP	1	0.00258672										T44	1	0.00645536	MCR	2	0.0048486	B29	6	0.00305008
															NYZ	1	0.014573							1CT	1	0.00258672										TBH	1	0.00645536	SLL	2	0.0048486	AZ2	6	0.00305008
															HMQ	1	0.014573							CIC	1	0.00258672										THG	1	0.00645536	MCI	2	0.0048486	D4T	6	0.00305008
															AKR	1	0.014573							1DF	1	0.00258672										TI1	1	0.00645536	MAV	2	0.0048486	HIW	6	0.00305008
															WL3	1	0.014573							1HN	1	0.00258672										TI2	1	0.00645536	MAE	2	0.0048486	GG6	6	0.00305008
															AH0	1	0.014573							CMC	1	0.00258672										TIO	1	0.00645536	SHR	2	0.0048486	DAB	6	0.00305008
															WQP	1	0.014573							184	1	0.00258672										MMK	1	0.00645536	PAE	2	0.0048486	PDG	6	0.00305008
															HOH	1	0.014573							C7C	1	0.00258672										MIS	1	0.00645536	M43	2	0.0048486	922	6	0.00305008
															MAE	1	0.014573							COD	1	0.00258672										DNV	1	0.00645536	PBE	2	0.0048486	PAE	6	0.00305008
															ACO	1	0.014573							156	1	0.00258672										FLR	1	0.00645536	PCA	2	0.0048486	HFD	6	0.00305008
															AAE	1	0.014573							C3S	1	0.00258672										FU9	1	0.00645536	LPR	2	0.0048486	ABU	6	0.00305008
															A2P	1	0.014573							11D	1	0.00258672										FUN	1	0.00645536	UN1	2	0.0048486	FKS	6	0.00305008
															ODV	1	0.014573							C2X	1	0.00258672										FX4	1	0.00645536	S3A	2	0.0048486	IP5	6	0.00305008
															X92	1	0.014573							C2U	1	0.00258672										G01	1	0.00645536	LHT	2	0.0048486	HTL	6	0.00305008
															HXD	1	0.014573							210	1	0.00258672										G1R	1	0.00645536	PL4	2	0.0048486	HXX	6	0.00305008
															PO3	1	0.014573							CP	1	0.00258672										G3H	1	0.00645536	LET	2	0.0048486	FER	6	0.00305008
															92K	1	0.014573							23G	1	0.00258672										G3P	1	0.00645536	LAF	2	0.0048486	DAN	6	0.00305008
															HMG	1	0.014573							25A	1	0.00258672										G6P	1	0.00645536	LAC	2	0.0048486	NPS	6	0.00305008
															LY0	1	0.014573							0XU	1	0.00258672										GAB	1	0.00645536	RTF	2	0.0048486	IDR	6	0.00305008
															GP9	1	0.014573							CP3	1	0.00258672										GCV	1	0.00645536	RTE	2	0.0048486	IL2	6	0.00305008
															RES	1	0.014573							C1F	1	0.00258672										GDN	1	0.00645536	PNK	2	0.0048486	CNU	6	0.00305008
															M3P	1	0.014573							0SZ	1	0.00258672										GOA	1	0.00645536	PNM	2	0.0048486	G3P	6	0.00305008
															LDE	1	0.014573							C0O	1	0.00258672										GOL	1	0.00645536	RMT	2	0.0048486	2HG	6	0.00305008
															UMA	1	0.014573							1WW	1	0.00258672										GRE	1	0.00645536	ORP	2	0.0048486	3PO	6	0.00305008
															BZS	1	0.014573							9O0	1	0.00258672										ZZ0	1	0.00645536	MO0	2	0.0048486	578	6	0.00305008
															BYA	1	0.014573							37V	1	0.00258672										GTQ	1	0.00645536	W8X	2	0.0048486	VNL	6	0.00305008
															HA0	1	0.014573							ACC	1	0.00258672										GTS	1	0.00645536	UBE	2	0.0048486	11B	6	0.00305008
															BMH	1	0.014573							76K	1	0.00258672										GZ3	1	0.00645536	TZG	2	0.0048486	V1D	6	0.00305008
															BKW	1	0.014573							A4K	1	0.00258672										H2S	1	0.00645536	NLE	2	0.0048486	2B4	6	0.00305008
															URP	1	0.014573							76H	1	0.00258672										H4P	1	0.00645536	TNQ	2	0.0048486	WAQ	6	0.00305008
															BES	1	0.014573							754	1	0.00258672										H6S	1	0.00645536	NHE	2	0.0048486	3EQ	6	0.00305008
															NKR	1	0.014573							6QR	1	0.00258672										FSA	1	0.00645536	NES	2	0.0048486	V1P	6	0.00305008
															HDQ	1	0.014573							A9Z	1	0.00258672										FFO	1	0.00645536	NDZ	2	0.0048486	3AT	6	0.00305008
															BDL	1	0.014573							ABA	1	0.00258672										MHI	1	0.00645536	UB1	2	0.0048486	STE	6	0.00305008
															NLP	1	0.014573							6OU	1	0.00258672										FEG	1	0.00645536	TIH	2	0.0048486	33Z	6	0.00305008
															PRO	1	0.014573							ACB	1	0.00258672										DNY	1	0.00645536	UBC	2	0.0048486	WY1	6	0.00305008
															B88	1	0.014573							6LD	1	0.00258672										DO1	1	0.00645536	OEM	2	0.0048486	T3F	6	0.00305008
															B4P	1	0.014573							AGS	1	0.00258672										DPV	1	0.00645536	N1L	2	0.0048486	343	6	0.00305008
															B4N	1	0.014573							ACD	1	0.00258672										DQG	1	0.00645536	THG	2	0.0048486	4MV	6	0.00305008
															HHH	1	0.014573							6B9	1	0.00258672										E1B	1	0.00645536	ORO	2	0.0048486	6DK	6	0.00305008
															QRJ	1	0.014573							6B7	1	0.00258672										E8P	1	0.00645536	UBF	2	0.0048486	2BO	6	0.00305008
																								6AS	1	0.00258672										EAH	1	0.00645536	TFB	2	0.0048486	Y1N	6	0.00305008
																								ACW	1	0.00258672										EDT	1	0.00645536	UD1	2	0.0048486	6DB	6	0.00305008
																								5NJ	1	0.00258672										EEB	1	0.00645536	UGA	2	0.0048486	1KM	6	0.00305008
																								5JV	1	0.00258672										EHS	1	0.00645536	ONH	2	0.0048486	393	6	0.00305008
																								ADI	1	0.00258672										EIC	1	0.00645536	ONZ	2	0.0048486	2DA	6	0.00305008
																								AFS	1	0.00258672										EK1	1	0.00645536	OOB	2	0.0048486	TV7	6	0.00305008
																								A4H	1	0.00258672										EK8	1	0.00645536	MTX	2	0.0048486	3HB	6	0.00305008
																								76L	1	0.00258672										EL5	1	0.00645536	MTD	2	0.0048486	30L	6	0.00305008
																								CYG	1	0.00258672										EP2	1	0.00645536	MSF	2	0.0048486	SSS	6	0.00305008
																								7SG	1	0.00258672										EPR	1	0.00645536	T3Y	2	0.0048486	67M	6	0.00305008
																								9O6	1	0.00258672										EPZ	1	0.00645536	PO3	2	0.0048486	0X9	6	0.00305008
																								9NO	1	0.00258672										ES6	1	0.00645536	TYD	2	0.0048486	XMP	6	0.00305008
																								9OT	1	0.00258672										F	1	0.00645536	PXP	2	0.0048486	MED	5	0.00254174
																								9NL	1	0.00258672										F49	1	0.00645536	PZN	2	0.0048486	GKR	5	0.00254174
																								9RC	1	0.00258672										FAH	1	0.00645536	K8D	2	0.0048486	SKP	5	0.00254174
																								91P	1	0.00258672										HCK	1	0.00645536	KC6	2	0.0048486	5IU	5	0.00254174
																								8V6	1	0.00258672										HEB	1	0.00645536	YSH	2	0.0048486	DGP	5	0.00254174
																								8GT	1	0.00258672										HFA	1	0.00645536	QC2	2	0.0048486	CRB	5	0.00254174
																								8DG	1	0.00258672										HGB	1	0.00645536	PRU	2	0.0048486	T3Q	5	0.00254174
																								9RW	1	0.00258672										JCD	1	0.00645536	PTR	2	0.0048486	EPC	5	0.00254174
																								8CS	1	0.00258672										JMS	1	0.00645536	QM4	2	0.0048486	RP4	5	0.00254174
																								85P	1	0.00258672										JRA	1	0.00645536	PPV	2	0.0048486	8BR	5	0.00254174
																								9YH	1	0.00258672										KKG	1	0.00645536	QC1	2	0.0048486	NDS	5	0.00254174
																								A12	1	0.00258672										KMT	1	0.00645536	K8Y	2	0.0048486	0FQ	5	0.00254174
																								A14	1	0.00258672										L34	1	0.00645536	PPS	2	0.0048486	FDA	5	0.00254174
																								840	1	0.00258672										LCV	1	0.00645536	QNA	2	0.0048486	TLO	5	0.00254174
																								83Y	1	0.00258672										LEA	1	0.00645536	PY0	2	0.0048486	KO2	5	0.00254174
																								A33	1	0.00258672										LRW	1	0.00645536	K8V	2	0.0048486	KGT	5	0.00254174
																								7WR	1	0.00258672										LSQ	1	0.00645536	KAY	2	0.0048486	UPF	5	0.00254174
																								5CU	1	0.00258672										LTH	1	0.00645536	K8G	2	0.0048486	5IP	5	0.00254174
																								AIC	1	0.00258672										LTX	1	0.00645536	6Z4	1	0.0024243	FLP	5	0.00254174
																								388	1	0.00258672										LVT	1	0.00645536	6H5	1	0.0024243	KIV	5	0.00254174
																								AXP	1	0.00258672										M3Q	1	0.00645536	8XO	1	0.0024243	GPS	5	0.00254174
																								3PI	1	0.00258672										M7S	1	0.00645536	TRH	1	0.0024243	ORN	5	0.00254174
																								AV5	1	0.00258672										M7V	1	0.00645536	8YF	1	0.0024243	EPR	5	0.00254174
																								3PE	1	0.00258672										M9N	1	0.00645536	TEG	1	0.0024243	PAV	5	0.00254174
																								9O3	1	0.00258672										MAH	1	0.00645536	BIR	1	0.0024243	F0P	5	0.00254174
																								3NA	1	0.00258672										MBO	1	0.00645536	91L	1	0.0024243	HDD	5	0.00254174
																								3N2	1	0.00258672										MC3	1	0.00645536	6LA	1	0.0024243	TXE	5	0.00254174
																								AVT	1	0.00258672										MEZ	1	0.00645536	6KB	1	0.0024243	0KX	5	0.00254174
																								AW8	1	0.00258672										JC2	1	0.00645536	93P	1	0.0024243	TZD	5	0.00254174
																								AXK	1	0.00258672										IYT	1	0.00645536	99T	1	0.0024243	HCA	5	0.00254174
																								3IL	1	0.00258672										IYG	1	0.00645536	9B3	1	0.0024243	3IO	5	0.00254174
																								58U	1	0.00258672										ICA	1	0.00645536	BIP	1	0.0024243	LGT	5	0.00254174
																								3HB	1	0.00258672										HGY	1	0.00645536	TCR	1	0.0024243	528	5	0.00254174
																								AY5	1	0.00258672										HHH	1	0.00645536	TV1	1	0.0024243	F6G	5	0.00254174
																								AY8	1	0.00258672										HHI	1	0.00645536	76R	1	0.0024243	TD7	5	0.00254174
																								3FG	1	0.00258672										HMG	1	0.00645536	BHN	1	0.0024243	HC4	5	0.00254174
																								3E2	1	0.00258672										HO6	1	0.00645536	9C2	1	0.0024243	TSA	5	0.00254174
																								3DS	1	0.00258672										HOH	1	0.00645536	9C4	1	0.0024243	TRH	5	0.00254174
																								B54	1	0.00258672										HYP	1	0.00645536	TB6	1	0.0024243	8OZ	5	0.00254174
																								B8C	1	0.00258672										IAC	1	0.00645536	BH2	1	0.0024243	VRB	5	0.00254174
																								BCV	1	0.00258672										IAR	1	0.00645536	BGP	1	0.0024243	SFG	5	0.00254174
																								ASV	1	0.00258672										ICE	1	0.00645536	TAT	1	0.0024243	ACA	5	0.00254174
																								3PO	1	0.00258672										IXD	1	0.00645536	QGM	1	0.0024243	PCD	5	0.00254174
																								3R6	1	0.00258672										ID5	1	0.00645536	BFN	1	0.0024243	8YL	5	0.00254174
																								3SS	1	0.00258672										ID8	1	0.00645536	T3F	1	0.0024243	UMA	5	0.00254174
																								564	1	0.00258672										IDS	1	0.00645536	TV7	1	0.0024243	PDA	5	0.00254174
																								55T	1	0.00258672										IDU	1	0.00645536	SVR	1	0.0024243	5BU	5	0.00254174
																								511	1	0.00258672										IHS	1	0.00645536	QGP	1	0.0024243	10G	5	0.00254174
																								4TP	1	0.00258672										ILE	1	0.00645536	BJ2	1	0.0024243	FM0	5	0.00254174
																								ALS	1	0.00258672										IPD	1	0.00645536	6OH	1	0.0024243	F6R	5	0.00254174
																								4PT	1	0.00258672										IRB	1	0.00645536	TFG	1	0.0024243	PED	5	0.00254174
																								ANZ	1	0.00258672										ITB	1	0.00645536	TID	1	0.0024243	SGN	5	0.00254174
																								4O9	1	0.00258672										042	1	0.00645536	76V	1	0.0024243	AKR	5	0.00254174
																								4O8	1	0.00258672													TLT	1	0.0024243	MDN	5	0.00254174
																								APV	1	0.00258672													78T	1	0.0024243	G1P	5	0.00254174
																								4NS	1	0.00258672													7A3	1	0.0024243	IZP	5	0.00254174
																								4ML	1	0.00258672													BN1	1	0.0024243	7UD	5	0.00254174
																								4G7	1	0.00258672													7BN	1	0.0024243	NIO	5	0.00254174
																								48T	1	0.00258672													BMP	1	0.0024243	GSM	5	0.00254174
																								48I	1	0.00258672													7EY	1	0.0024243	2BA	5	0.00254174
																								47D	1	0.00258672													TLO	1	0.0024243	28P	5	0.00254174
																								3UH	1	0.00258672													7IA	1	0.0024243	M1V	5	0.00254174
																								3UC	1	0.00258672													BMH	1	0.0024243	NX6	5	0.00254174
																								3T4	1	0.00258672													7QA	1	0.0024243	7U7	5	0.00254174
																								76M	1	0.00258672													6U6	1	0.0024243	CH	5	0.00254174
																								ZYL	1	0.00258672													THP	1	0.0024243	REL	5	0.00254174
																								D17	1	0.00258672													TGC	1	0.0024243	DUP	5	0.00254174
																								OSE	1	0.00258672													840	1	0.0024243	AP5	5	0.00254174
																								P6F	1	0.00258672													89V	1	0.0024243	17A	5	0.00254174
																								PAB	1	0.00258672													8BR	1	0.0024243	G16	5	0.00254174
																								PAE	1	0.00258672													8D4	1	0.0024243	CHO	5	0.00254174
																								PAN	1	0.00258672													6T7	1	0.0024243	ZP1	5	0.00254174
																								PAP	1	0.00258672													BLO	1	0.0024243	IBP	5	0.00254174
																								PAY	1	0.00258672													QIC	1	0.0024243	PYC	5	0.00254174
																								PAZ	1	0.00258672													Q74	1	0.0024243	173	5	0.00254174
																								PC	1	0.00258672													BQ7	1	0.0024243	MNR	5	0.00254174
																								PC4	1	0.00258672													BLA	1	0.0024243	AMO	5	0.00254174
																								PD7	1	0.00258672													TQ9	1	0.0024243	PPD	5	0.00254174
																								PEE	1	0.00258672													THD	1	0.0024243	LY0	5	0.00254174
																								PEF	1	0.00258672													8HQ	1	0.0024243	7UG	5	0.00254174
																								PEH	1	0.00258672													AVT	1	0.0024243	NLP	5	0.00254174
																								PGA	1	0.00258672													9T1	1	0.0024243	RES	5	0.00254174
																								PGU	1	0.00258672													9KP	1	0.0024243	CMP	5	0.00254174
																								PHD	1	0.00258672													B4X	1	0.0024243	HH2	5	0.00254174
																								PIF	1	0.00258672													S1G	1	0.0024243	POA	5	0.00254174
																								PKM	1	0.00258672													APC	1	0.0024243	EDK	5	0.00254174
																								PL6	1	0.00258672													B8P	1	0.0024243	SLC	5	0.00254174
																								PLR	1	0.00258672													AP5	1	0.0024243	55T	4	0.00203339
																								PPG	1	0.00258672													AP2	1	0.0024243	10D	4	0.00203339
																								PPS	1	0.00258672													B92	1	0.0024243	570	4	0.00203339
																								PUP	1	0.00258672													AO7	1	0.0024243	W8X	4	0.00203339
																								Q2P	1	0.00258672													B93	1	0.0024243	TD8	4	0.00203339
																								Q74	1	0.00258672													ANP	1	0.0024243	0ZD	4	0.00203339
																								QCQ	1	0.00258672													B94	1	0.0024243	HOH	4	0.00203339
																								QTT	1	0.00258672													AMU	1	0.0024243	OTP	4	0.00203339
																								R5P	1	0.00258672													S1S	1	0.0024243	NGQ	4	0.00203339
																								RAT	1	0.00258672													BCN	1	0.0024243	HNI	4	0.00203339
																								OXS	1	0.00258672													S3C	1	0.0024243	C8J	4	0.00203339
																								OQE	1	0.00258672													ALR	1	0.0024243	1CP	4	0.00203339
																								REA	1	0.00258672													RUR	1	0.0024243	CYG	4	0.00203339
																								OMU	1	0.00258672													RUB	1	0.0024243	HE7	4	0.00203339
																								M9F	1	0.00258672													SUS	1	0.0024243	NPG	4	0.00203339
																								MAK	1	0.00258672													QSP	1	0.0024243	CDC	4	0.00203339
																								MD3	1	0.00258672													AVD	1	0.0024243	P22	4	0.00203339
																								MD5	1	0.00258672													AV5	1	0.0024243	414	4	0.00203339
																								MEZ	1	0.00258672													R5I	1	0.0024243	B08	4	0.00203339
																								MFN	1	0.00258672													AVU	1	0.0024243	TFG	4	0.00203339
																								MGF	1	0.00258672													RDF	1	0.0024243	F49	4	0.00203339
																								MI9	1	0.00258672													REC	1	0.0024243	SMN	4	0.00203339
																								MLC	1	0.00258672													AVW	1	0.0024243	CBH	4	0.00203339
																								MLZ	1	0.00258672													REX	1	0.0024243	C2P	4	0.00203339
																								MQ4	1	0.00258672													REZ	1	0.0024243	P1T	4	0.00203339
																								MUX	1	0.00258672													RF5	1	0.0024243	3PY	4	0.00203339
																								MYA	1	0.00258672													ASG	1	0.0024243	ASG	4	0.00203339
																								N	1	0.00258672													AW8	1	0.0024243	GCD	4	0.00203339
																								N04	1	0.00258672													AYC	1	0.0024243	53N	4	0.00203339
																								N21	1	0.00258672													QUS	1	0.0024243	IDS	4	0.00203339
																								N3A	1	0.00258672													QT8	1	0.0024243	M3Q	4	0.00203339
																								NG6	1	0.00258672													ALO	1	0.0024243	IMO	4	0.00203339
																								NGY	1	0.00258672													S3P	1	0.0024243	B4P	4	0.00203339
																								NHC	1	0.00258672													S3V	1	0.0024243	YE1	4	0.00203339
																								NJS	1	0.00258672													SA8	1	0.0024243	LZ6	4	0.00203339
																								NLG	1	0.00258672													QKK	1	0.0024243	LRG	4	0.00203339
																								NM2	1	0.00258672													SL6	1	0.0024243	AGA	4	0.00203339
																								O02	1	0.00258672													BES	1	0.0024243	TJE	4	0.00203339
																								O05	1	0.00258672													AAC	1	0.0024243	TNQ	4	0.00203339
																								O7J	1	0.00258672													A3R	1	0.0024243	TNA	4	0.00203339
																								OCV	1	0.00258672													SME	1	0.0024243	TDK	4	0.00203339
																								OFF	1	0.00258672													A2P	1	0.0024243	LSW	4	0.00203339
																								OKP	1	0.00258672													A22	1	0.0024243	SIR	4	0.00203339
																								RC1	1	0.00258672													A1R	1	0.0024243	0SZ	4	0.00203339
																								RES	1	0.00258672													SU6	1	0.0024243	P2S	4	0.00203339
																								D5M	1	0.00258672													9ZV	1	0.0024243	ALS	4	0.00203339
																								TGG	1	0.00258672													9Z6	1	0.0024243	O3Z	4	0.00203339
																								TLT	1	0.00258672													9YH	1	0.0024243	G5J	4	0.00203339
																								TMP	1	0.00258672													R2P	1	0.0024243	STP	4	0.00203339
																								TPP	1	0.00258672													9S7	1	0.0024243	FDE	4	0.00203339
																								TTN	1	0.00258672													SKM	1	0.0024243	CPT	4	0.00203339
																								TXN	1	0.00258672													SI3	1	0.0024243	ID8	4	0.00203339
																								UCD	1	0.00258672													ACA	1	0.0024243	TPS	4	0.00203339
																								UDH	1	0.00258672													SH0	1	0.0024243	CTM	4	0.00203339
																								UN1	1	0.00258672													AKM	1	0.0024243	NTE	4	0.00203339
																								UNG	1	0.00258672													SDS	1	0.0024243	THV	4	0.00203339
																								V10	1	0.00258672													SFQ	1	0.0024243	SFI	4	0.00203339
																								V20	1	0.00258672													SGC	1	0.0024243	C6P	4	0.00203339
																								VAE	1	0.00258672													ADQ	1	0.0024243	O7J	4	0.00203339
																								VAZ	1	0.00258672													SGN	1	0.0024243	OP1	4	0.00203339
																								VB1	1	0.00258672													TYM	1	0.0024243	SHF	4	0.00203339
																								VNL	1	0.00258672													QLP	1	0.0024243	NXA	4	0.00203339
																								W05	1	0.00258672													BCZ	1	0.0024243	ONL	4	0.00203339
																								W8X	1	0.00258672													ACV	1	0.0024243	TP9	4	0.00203339
																								WY1	1	0.00258672													SHN	1	0.0024243	NFQ	4	0.00203339
																								XSN	1	0.00258672													BDS	1	0.0024243	ACV	4	0.00203339
																								Y03	1	0.00258672													ACP	1	0.0024243	SHT	4	0.00203339
																								Y04	1	0.00258672													QM1	1	0.0024243	SV7	4	0.00203339
																								Y06	1	0.00258672													K7A	1	0.0024243	AOZ	4	0.00203339
																								Y07	1	0.00258672													5E0	1	0.0024243	3K0	4	0.00203339
																								Y09	1	0.00258672													6CS	1	0.0024243	L69	4	0.00203339
																								YRR	1	0.00258672													61M	1	0.0024243	GCU	4	0.00203339
																								Z90	1	0.00258672													VPD	1	0.0024243	KIU	4	0.00203339
																								Z99	1	0.00258672													2HC	1	0.0024243	PS7	4	0.00203339
																								ZEM	1	0.00258672													2E7	1	0.0024243	BZ2	4	0.00203339
																								ZP1	1	0.00258672													2E6	1	0.0024243	R5P	4	0.00203339
																								THG	1	0.00258672													2E5	1	0.0024243	RAT	4	0.00203339
																								TDP	1	0.00258672													2E4	1	0.0024243	IZC	4	0.00203339
																								RHE	1	0.00258672													2CL	1	0.0024243	IYR	4	0.00203339
																								TD9	1	0.00258672													VSO	1	0.0024243	6CL	4	0.00203339
																								RHN	1	0.00258672													2BA	1	0.0024243	3CP	4	0.00203339
																								RMN	1	0.00258672													2AX	1	0.0024243	6CK	4	0.00203339
																								RUB	1	0.00258672													27C	1	0.0024243	3E2	4	0.00203339
																								RUR	1	0.00258672													WE0	1	0.0024243	MSE	4	0.00203339
																								RVA	1	0.00258672													WHH	1	0.0024243	DOF	4	0.00203339
																								RVB	1	0.00258672													WPL	1	0.0024243	KAW	4	0.00203339
																								RVC	1	0.00258672													WY1	1	0.0024243	7V4	4	0.00203339
																								RVD	1	0.00258672													1WW	1	0.0024243	XG4	4	0.00203339
																								RVE	1	0.00258672													X1X	1	0.0024243	DND	4	0.00203339
																								S2N	1	0.00258672													1S6	1	0.0024243	864	4	0.00203339
																								S6P	1	0.00258672													1PS	1	0.0024243	BIX	4	0.00203339
																								SC1	1	0.00258672													VJJ	1	0.0024243	T3Y	4	0.00203339
																								SCA	1	0.00258672													2HZ	1	0.0024243	PMM	4	0.00203339
																								SCR	1	0.00258672													VII	1	0.0024243	FEG	4	0.00203339
																								SCV	1	0.00258672													2QE	1	0.0024243	HPX	4	0.00203339
																								SFD	1	0.00258672													2WR	1	0.0024243	60N	4	0.00203339
																								SH0	1	0.00258672													2WQ	1	0.0024243	DHY	4	0.00203339
																								SHT	1	0.00258672													VAH	1	0.0024243	KEU	4	0.00203339
																								SIM	1	0.00258672													VAO	1	0.0024243	PSL	4	0.00203339
																								SMN	1	0.00258672													2VE	1	0.0024243	BRU	4	0.00203339
																								SPV	1	0.00258672													2VD	1	0.0024243	ZOM	4	0.00203339
																								ST2	1	0.00258672													2TI	1	0.0024243	GP9	4	0.00203339
																								ST4	1	0.00258672													2RG	1	0.0024243	3AR	4	0.00203339
																								T2C	1	0.00258672													VAU	1	0.0024243	QUS	4	0.00203339
																								T3Y	1	0.00258672													2JK	1	0.0024243	QNA	4	0.00203339
																								T44	1	0.00258672													2PC	1	0.0024243	TAP	4	0.00203339
																								T5K	1	0.00258672													2OP	1	0.0024243	ZZ8	4	0.00203339
																								TAP	1	0.00258672													2NO	1	0.0024243	388	4	0.00203339
																								TBV	1	0.00258672													2NE	1	0.0024243	MMB	4	0.00203339
																								M83	1	0.00258672													2MG	1	0.0024243	DYA	4	0.00203339
																								M2W	1	0.00258672													2M9	1	0.0024243	074	4	0.00203339
																								M2P	1	0.00258672													2KT	1	0.0024243	73N	4	0.00203339
																								F5D	1	0.00258672													2JL	1	0.0024243	MMK	4	0.00203339
																								FGA	1	0.00258672													XBP	1	0.0024243	GST	4	0.00203339
																								FGP	1	0.00258672													1N5	1	0.0024243	GTQ	4	0.00203339
																								FLP	1	0.00258672													XPO	1	0.0024243	240	4	0.00203339
																								FMI	1	0.00258672													0JX	1	0.0024243	MMV	4	0.00203339
																								FOA	1	0.00258672													0SL	1	0.0024243	QVE	4	0.00203339
																								FOT	1	0.00258672													ZMR	1	0.0024243	23T	4	0.00203339
																								FSA	1	0.00258672													ZOM	1	0.0024243	7B0	4	0.00203339
																								FSX	1	0.00258672													0RM	1	0.0024243	7FN	4	0.00203339
																								FT8	1	0.00258672													0O3	1	0.0024243	GTD	4	0.00203339
																								G01	1	0.00258672													0O2	1	0.0024243	MJI	4	0.00203339
																								G16	1	0.00258672													0L1	1	0.0024243	Q02	4	0.00203339
																								G2Q	1	0.00258672													0K2	1	0.0024243	V3L	4	0.00203339
																								G4M	1	0.00258672													ZP1	1	0.0024243	PXG	4	0.00203339
																								G5J	1	0.00258672													0UM	1	0.0024243	RO7	4	0.00203339
																								G9Z	1	0.00258672													ZT2	1	0.0024243	MUR	4	0.00203339
																								GAB	1	0.00258672													0HN	1	0.0024243	3EF	4	0.00203339
																								GAG	1	0.00258672													0CN	1	0.0024243	2FP	4	0.00203339
																								GBC	1	0.00258672													0CM	1	0.0024243	S2G	4	0.00203339
																								GBD	1	0.00258672													0CJ	1	0.0024243	L06	4	0.00203339
																								GDR	1	0.00258672													0CH	1	0.0024243	GLV	4	0.00203339
																								GDS	1	0.00258672													0CG	1	0.0024243	S3P	4	0.00203339
																								GG9	1	0.00258672													043	1	0.0024243	L3A	4	0.00203339
																								GHM	1	0.00258672													Z98	1	0.0024243	X8Z	4	0.00203339
																								GJP	1	0.00258672													Z06	1	0.0024243	1WX	4	0.00203339
																								GJS	1	0.00258672													1JY	1	0.0024243	Z9M	4	0.00203339
																								GM0	1	0.00258672													161	1	0.0024243	3FG	4	0.00203339
																								GM7	1	0.00258672													XYT	1	0.0024243	T1N	4	0.00203339
																								GNJ	1	0.00258672													1F1	1	0.0024243	PBC	4	0.00203339
																								GNM	1	0.00258672													1CP	1	0.0024243	UCD	4	0.00203339
																								FDQ	1	0.00258672													1CC	1	0.0024243	PAP	4	0.00203339
																								F42	1	0.00258672													YBH	1	0.0024243	2K8	4	0.00203339
																								M15	1	0.00258672													192	1	0.0024243	SAI	4	0.00203339
																								F	1	0.00258672													173	1	0.0024243	PAC	4	0.00203339
																								DAB	1	0.00258672													YC8	1	0.0024243	PAB	4	0.00203339
																								DAN	1	0.00258672													160	1	0.0024243	PA8	4	0.00203339
																								DDZ	1	0.00258672													0X9	1	0.0024243	L98	4	0.00203339
																								DHB	1	0.00258672													14I	1	0.0024243	BES	4	0.00203339
																								DKA	1	0.00258672													13S	1	0.0024243	9ON	4	0.00203339
																								DN4	1	0.00258672													YCP	1	0.0024243	D3M	4	0.00203339
																								DN9	1	0.00258672													12T	1	0.0024243	1U0	4	0.00203339
																								DOB	1	0.00258672													YI6	1	0.0024243	2PO	4	0.00203339
																								DOC	1	0.00258672													10D	1	0.0024243	P3S	4	0.00203339
																								DOR	1	0.00258672													0YS	1	0.0024243	3ES	4	0.00203339
																								DPO	1	0.00258672													0Y0	1	0.0024243	I5P	4	0.00203339
																								DTH	1	0.00258672													2X9	1	0.0024243	DED	4	0.00203339
																								DW8	1	0.00258672													2YZ	1	0.0024243	UNT	4	0.00203339
																								DWE	1	0.00258672													V1D	1	0.0024243	FLU	4	0.00203339
																								DWK	1	0.00258672													4MB	1	0.0024243	2E4	4	0.00203339
																								DXP	1	0.00258672													4TA	1	0.0024243	H6P	4	0.00203339
																								DYN	1	0.00258672													4R1	1	0.0024243	8PE	4	0.00203339
																								E0T	1	0.00258672													4QY	1	0.0024243	KPC	4	0.00203339
																								E0Y	1	0.00258672													4P5	1	0.0024243	KSN	4	0.00203339
																								EAH	1	0.00258672													4O9	1	0.0024243	EPH	4	0.00203339
																								EDC	1	0.00258672													4O8	1	0.0024243	8GD	4	0.00203339
																								EE1	1	0.00258672													4NK	1	0.0024243	5OM	4	0.00203339
																								EKQ	1	0.00258672													4MV	1	0.0024243	DGI	4	0.00203339
																								ENJ	1	0.00258672													4KO	1	0.0024243	RX3	4	0.00203339
																								ENO	1	0.00258672													4ZK	1	0.0024243	ISP	4	0.00203339
																								ENP	1	0.00258672													4IC	1	0.0024243	PEK	4	0.00203339
																								EOW	1	0.00258672													4G7	1	0.0024243	KNA	4	0.00203339
																								EPR	1	0.00258672													4E7	1	0.0024243	EPA	4	0.00203339
																								EVM	1	0.00258672													UD0	1	0.0024243	RUB	4	0.00203339
																								GOG	1	0.00258672													4E3	1	0.0024243	TCH	3	0.00152504
																								GP3	1	0.00258672													4DS	1	0.0024243	I3S	3	0.00152504
																								GPF	1	0.00258672													4CS	1	0.0024243	C2G	3	0.00152504
																								GTB	1	0.00258672													47D	1	0.0024243	C93	3	0.00152504
																								IP9	1	0.00258672													4UF	1	0.0024243	MGF	3	0.00152504
																								ISJ	1	0.00258672													50A	1	0.0024243	X93	3	0.00152504
																								ITB	1	0.00258672													3YN	1	0.0024243	19N	3	0.00152504
																								ITW	1	0.00258672													5PH	1	0.0024243	I0P	3	0.00152504
																								IZP	1	0.00258672													609	1	0.0024243	C6L	3	0.00152504
																								J6T	1	0.00258672													5XP	1	0.0024243	FGP	3	0.00152504
																								JAA	1	0.00258672													5XO	1	0.0024243	2YZ	3	0.00152504
																								JMS	1	0.00258672													5XN	1	0.0024243	FDF	3	0.00152504
																								JNW	1	0.00258672													5V0	1	0.0024243	TB6	3	0.00152504
																								JUQ	1	0.00258672													U1K	1	0.0024243	C1F	3	0.00152504
																								K7A	1	0.00258672													5Q1	1	0.0024243	37E	3	0.00152504
																								K99	1	0.00258672													5PU	1	0.0024243	X94	3	0.00152504
																								KAY	1	0.00258672													5P3	1	0.0024243	37V	3	0.00152504
																								KD2	1	0.00258672													511	1	0.0024243	X92	3	0.00152504
																								KIV	1	0.00258672													U2P	1	0.0024243	HYP	3	0.00152504
																								KYK	1	0.00258672													5OL	1	0.0024243	LGU	3	0.00152504
																								KYW	1	0.00258672													U8K	1	0.0024243	2X9	3	0.00152504
																								L2D	1	0.00258672													BRH	1	0.0024243	CB3	3	0.00152504
																								L2M	1	0.00258672													5DZ	1	0.0024243	DOE	3	0.00152504
																								L4D	1	0.00258672													5DY	1	0.0024243	2CP	3	0.00152504
																								L98	1	0.00258672													5DX	1	0.0024243	DLY	3	0.00152504
																								LA6	1	0.00258672													5CM	1	0.0024243	UUA	3	0.00152504
																								LCP	1	0.00258672													40E	1	0.0024243	KD2	3	0.00152504
																								LGU	1	0.00258672													3YD	1	0.0024243	IU	3	0.00152504
																								LHY	1	0.00258672													UVW	1	0.0024243	URQ	3	0.00152504
																								LIT	1	0.00258672													UPG	1	0.0024243	URP	3	0.00152504
																								LK3	1	0.00258672													3HL	1	0.0024243	2DT	3	0.00152504
																								LLH	1	0.00258672													UPA	1	0.0024243	DHK	3	0.00152504
																								LVA	1	0.00258672													3HA	1	0.0024243	ITN	3	0.00152504
																								IP1	1	0.00258672													3GQ	1	0.0024243	DHE	3	0.00152504
																								IK4	1	0.00258672													3G5	1	0.0024243	DHC	3	0.00152504
																								ID8	1	0.00258672													3EK	1	0.0024243	2E6	3	0.00152504
																								HIF	1	0.00258672													3EJ	1	0.0024243	235	3	0.00152504
																								GTR	1	0.00258672													3EB	1	0.0024243	VOV	3	0.00152504
																								GVA	1	0.00258672													3E2	1	0.0024243	2G2	3	0.00152504
																								HC4	1	0.00258672													3HU	1	0.0024243	DDF	3	0.00152504
																								HC5	1	0.00258672													UUA	1	0.0024243	L41	3	0.00152504
																								HCA	1	0.00258672													3DR	1	0.0024243	IVA	3	0.00152504
																								HCG	1	0.00258672													3DJ	1	0.0024243	KAF	3	0.00152504
																								HCS	1	0.00258672													3BY	1	0.0024243	DPP	3	0.00152504
																								HD4	1	0.00258672													3AT	1	0.0024243	DTH	3	0.00152504
																								HE6	1	0.00258672													UV8	1	0.0024243	24L	3	0.00152504
																								HEL	1	0.00258672													388	1	0.0024243	DZA	3	0.00152504
																								HFA	1	0.00258672													37V	1	0.0024243	VEA	3	0.00152504
																								HFD	1	0.00258672													3HR	1	0.0024243	DYT	3	0.00152504
																								HFV	1	0.00258672													3IL	1	0.0024243	JNW	3	0.00152504
																								HJ7	1	0.00258672													3Y8	1	0.0024243	DXC	3	0.00152504
																								ID5	1	0.00258672													3P7	1	0.0024243	JQS	3	0.00152504
																								HJT	1	0.00258672													3UH	1	0.0024243	DUD	3	0.00152504
																								HO6	1	0.00258672													3T4	1	0.0024243	ENJ	3	0.00152504
																								HOC	1	0.00258672													3S0	1	0.0024243	K8Y	3	0.00152504
																								HOH	1	0.00258672													3Q7	1	0.0024243	K1U	3	0.00152504
																								HP7	1	0.00258672													UGC	1	0.0024243	V28	3	0.00152504
																								HVS	1	0.00258672													3PO	1	0.0024243	DSN	3	0.00152504
																								HYP	1	0.00258672													3PI	1	0.0024243	K2P	3	0.00152504
																								I0P	1	0.00258672													UM3	1	0.0024243	J01	3	0.00152504
																								I3C	1	0.00258672													3OC	1	0.0024243	K2U	3	0.00152504
																								I3S	1	0.00258672													3IO	1	0.0024243	2CL	3	0.00152504
																								I4D	1	0.00258672													3NM	1	0.0024243	ENO	3	0.00152504
																								I98	1	0.00258672													3NA	1	0.0024243	UM3	3	0.00152504
																								IBP	1	0.00258672													3LR	1	0.0024243	1WW	3	0.00152504
																								03S	1	0.00258672													3KE	1	0.0024243	1W9	3	0.00152504
																																							3JX	1	0.0024243	2WQ	3	0.00152504
																																							3JN	1	0.0024243	CN6	3	0.00152504
																																							3JM	1	0.0024243	CN3	3	0.00152504
																																							UNG	1	0.0024243	1K4	3	0.00152504
																																							Q03	1	0.0024243	M15	3	0.00152504
																																							C93	1	0.0024243	ID5	3	0.00152504
																																							Q02	1	0.0024243	1GP	3	0.00152504
																																							GLP	1	0.0024243	CIR	3	0.00152504
																																							GNP	1	0.0024243	CIL	3	0.00152504
																																							GNM	1	0.0024243	2WR	3	0.00152504
																																							MGF	1	0.0024243	1ML	3	0.00152504
																																							GN1	1	0.0024243	TGG	3	0.00152504
																																							MIC	1	0.0024243	IAS	3	0.00152504
																																							MIS	1	0.0024243	I98	3	0.00152504
																																							MJA	1	0.0024243	MA7	3	0.00152504
																																							MK4	1	0.0024243	2X0	3	0.00152504
																																							ML0	1	0.0024243	I84	3	0.00152504
																																							GDR	1	0.0024243	MAV	3	0.00152504
																																							ML4	1	0.0024243	1DF	3	0.00152504
																																							GJP	1	0.0024243	FA1	3	0.00152504
																																							MLC	1	0.0024243	CO8	3	0.00152504
																																							GGS	1	0.0024243	2HZ	3	0.00152504
																																							MLD	1	0.0024243	TTN	3	0.00152504
																																							MPH	1	0.0024243	2ML	3	0.00152504
																																							GFN	1	0.0024243	EU8	3	0.00152504
																																							MPO	1	0.0024243	U2F	3	0.00152504
																																							MFK	1	0.0024243	D5M	3	0.00152504
																																							MCO	1	0.0024243	2P0	3	0.00152504
																																							GOL	1	0.0024243	D32	3	0.00152504
																																							GP9	1	0.0024243	D1X	3	0.00152504
																																							LW8	1	0.0024243	F42	3	0.00152504
																																							LX0	1	0.0024243	1OV	3	0.00152504
																																							M15	1	0.0024243	TLT	3	0.00152504
																																							H3S	1	0.0024243	LIT	3	0.00152504
																																							M1V	1	0.0024243	LIZ	3	0.00152504
																																							M2P	1	0.0024243	CTE	3	0.00152504
																																							H01	1	0.0024243	2TM	3	0.00152504
																																							GUZ	1	0.0024243	ILP	3	0.00152504
																																							GUF	1	0.0024243	ILO	3	0.00152504
																																							M3P	1	0.0024243	F98	3	0.00152504
																																							M60	1	0.0024243	IK2	3	0.00152504
																																							M7G	1	0.0024243	X95	3	0.00152504
																																							M7R	1	0.0024243	B2A	3	0.00152504
																																							M7V	1	0.0024243	3AM	3	0.00152504
																																							M9K	1	0.0024243	6B7	3	0.00152504
																																							MC3	1	0.0024243	OTD	3	0.00152504
																																							GPP	1	0.0024243	SFD	3	0.00152504
																																							GEP	1	0.0024243	7U1	3	0.00152504
																																							MX5	1	0.0024243	HEB	3	0.00152504
																																							LTH	1	0.0024243	GP1	3	0.00152504
																																							FPK	1	0.0024243	AAE	3	0.00152504
																																							FUU	1	0.0024243	7UC	3	0.00152504
																																							FUH	1	0.0024243	A2R	3	0.00152504
																																							FT5	1	0.0024243	P20	3	0.00152504
																																							N4N	1	0.0024243	P6P	3	0.00152504
																																							N5Q	1	0.0024243	6AD	3	0.00152504
																																							N72	1	0.0024243	9WN	3	0.00152504
																																							FQZ	1	0.0024243	7UJ	3	0.00152504
																																							FPR	1	0.0024243	GDD	3	0.00152504
																																							FOA	1	0.0024243	GDE	3	0.00152504
																																							GCW	1	0.0024243	REW	3	0.00152504
																																							FNR	1	0.0024243	9PE	3	0.00152504
																																							N9A	1	0.0024243	ZGP	3	0.00152504
																																							N9D	1	0.0024243	OSE	3	0.00152504
																																							NAU	1	0.0024243	ORP	3	0.00152504
																																							FLP	1	0.0024243	ORO	3	0.00152504
																																							NDS	1	0.0024243	PRE	3	0.00152504
																																							FKS	1	0.0024243	OHP	3	0.00152504
																																							FJP	1	0.0024243	GAU	3	0.00152504
																																							FX4	1	0.0024243	6LD	3	0.00152504
																																							FZZ	1	0.0024243	PL5	3	0.00152504
																																							MYI	1	0.0024243	7SM	3	0.00152504
																																							G16	1	0.0024243	PTY	3	0.00152504
																																							GCV	1	0.0024243	7SY	3	0.00152504
																																							MXC	1	0.0024243	7TY	3	0.00152504
																																							MXF	1	0.0024243	ADQ	3	0.00152504
																																							GC9	1	0.0024243	OKP	3	0.00152504
																																							MXR	1	0.0024243	GBX	3	0.00152504
																																							ZXG	1	0.0024243	0NB	3	0.00152504
																																							GAS	1	0.0024243	AD9	3	0.00152504
																																							MY1	1	0.0024243	4NS	3	0.00152504
																																							MY2	1	0.0024243	4O8	3	0.00152504
																																							MY3	1	0.0024243	4O9	3	0.00152504
																																							G6P	1	0.0024243	4OA	3	0.00152504
																																							G4P	1	0.0024243	P6F	3	0.00152504
																																							MY5	1	0.0024243	P7I	3	0.00152504
																																							G39	1	0.0024243	G9Z	3	0.00152504
																																							G2R	1	0.0024243	PMG	3	0.00152504
																																							G20	1	0.0024243	S1S	3	0.00152504
																																							G1N	1	0.0024243	S0H	3	0.00152504
																																							LUB	1	0.0024243	5FU	3	0.00152504
																																							LSO	1	0.0024243	PMH	3	0.00152504
																																							NHC	1	0.0024243	5HR	3	0.00152504
																																							IDR	1	0.0024243	8FL	3	0.00152504
																																							ING	1	0.0024243	PGT	3	0.00152504
																																							IMO	1	0.0024243	GGS	3	0.00152504
																																							IMI	1	0.0024243	PLU	3	0.00152504
																																							IM2	1	0.0024243	7UY	3	0.00152504
																																							IKM	1	0.0024243	8EL	3	0.00152504
																																							IK2	1	0.0024243	606	3	0.00152504
																																							KCP	1	0.0024243	H1S	3	0.00152504
																																							IHP	1	0.0024243	H27	3	0.00152504
																																							KD0	1	0.0024243	PIN	3	0.00152504
																																							KOV	1	0.0024243	PLA	3	0.00152504
																																							KDO	1	0.0024243	89L	3	0.00152504
																																							KGC	1	0.0024243	RP5	3	0.00152504
																																							KIV	1	0.0024243	PEB	3	0.00152504
																																							IBP	1	0.0024243	0JO	3	0.00152504
																																							IBC	1	0.0024243	5CU	3	0.00152504
																																							IAD	1	0.0024243	642	3	0.00152504
																																							IAC	1	0.0024243	67F	3	0.00152504
																																							I98	1	0.0024243	HC5	3	0.00152504
																																							KAL	1	0.0024243	PNK	3	0.00152504
																																							IPE	1	0.0024243	9LU	3	0.00152504
																																							IQA	1	0.0024243	576	3	0.00152504
																																							ISC	1	0.0024243	9HO	3	0.00152504
																																							K8J	1	0.0024243	SA8	3	0.00152504
																																							JRN	1	0.0024243	58Z	3	0.00152504
																																							JRH	1	0.0024243	983	3	0.00152504
																																							JQQ	1	0.0024243	0K2	3	0.00152504
																																							JQK	1	0.0024243	PBE	3	0.00152504
																																							JQH	1	0.0024243	PBG	3	0.00152504
																																							JQ5	1	0.0024243	S6P	3	0.00152504
																																							JP2	1	0.0024243	0JX	3	0.00152504
																																							JMS	1	0.0024243	GW0	3	0.00152504
																																							JAA	1	0.0024243	PCA	3	0.00152504
																																							J6S	1	0.0024243	PCG	3	0.00152504
																																							J2G	1	0.0024243	4HP	3	0.00152504
																																							K9B	1	0.0024243	HFA	3	0.00152504
																																							K9K	1	0.0024243	AIR	3	0.00152504
																																							ITW	1	0.0024243	ASB	3	0.00152504
																																							ITB	1	0.0024243	3PE	3	0.00152504
																																							KAH	1	0.0024243	NAX	3	0.00152504
																																							KL8	1	0.0024243	NCD	3	0.00152504
																																							KPF	1	0.0024243	NCN	3	0.00152504
																																							H6P	1	0.0024243	HPD	3	0.00152504
																																							HCT	1	0.0024243	BAL	3	0.00152504
																																							L92	1	0.0024243	HP7	3	0.00152504
																																							L98	1	0.0024243	B75	3	0.00152504
																																							L9D	1	0.0024243	B28	3	0.00152504
																																							L9Z	1	0.0024243	FT8	3	0.00152504
																																							HE7	1	0.0024243	AW8	3	0.00152504
																																							HE6	1	0.0024243	AVT	3	0.00152504
																																							HE0	1	0.0024243	ZPR	3	0.00152504
																																							LEL	1	0.0024243	SPV	3	0.00152504
																																							HCH	1	0.0024243	FUN	3	0.00152504
																																							I20	1	0.0024243	SPQ	3	0.00152504
																																							HCE	1	0.0024243	Q74	3	0.00152504
																																							LGU	1	0.0024243	3PB	3	0.00152504
																																							LHY	1	0.0024243	3NA	3	0.00152504
																																							HA5	1	0.0024243	T01	3	0.00152504
																																							LIT	1	0.0024243	BNY	3	0.00152504
																																							LOY	1	0.0024243	MLZ	3	0.00152504
																																							LPA	1	0.0024243	MN0	3	0.00152504
																																							H6S	1	0.0024243	BSI	3	0.00152504
																																							L3P	1	0.0024243	6PC	3	0.00152504
																																							HFA	1	0.0024243	T5X	3	0.00152504
																																							HFD	1	0.0024243	HVS	3	0.00152504
																																							HFP	1	0.0024243	QMH	3	0.00152504
																																							HYP	1	0.0024243	QLP	3	0.00152504
																																							HXC	1	0.0024243	N7T	3	0.00152504
																																							HWK	1	0.0024243	HT7	3	0.00152504
																																							HTL	1	0.0024243	BHZ	3	0.00152504
																																							HTD	1	0.0024243	6S6	3	0.00152504
																																							HS2	1	0.0024243	HRG	3	0.00152504
																																							HQC	1	0.0024243	3FB	3	0.00152504
																																							HQ2	1	0.0024243	N37	3	0.00152504
																																							HPZ	1	0.0024243	T06	3	0.00152504
																																							HPP	1	0.0024243	3T4	3	0.00152504
																																							HPK	1	0.0024243	AV5	3	0.00152504
																																							KSN	1	0.0024243	88R	3	0.00152504
																																							KVP	1	0.0024243	Q35	3	0.00152504
																																							KVV	1	0.0024243	G39	3	0.00152504
																																							KYN	1	0.0024243	AP2	3	0.00152504
																																							L34	1	0.0024243	48I	3	0.00152504
																																							HH4	1	0.0024243	G4P	3	0.00152504
																																							FHC	1	0.0024243	3UH	3	0.00152504
																																							NIC	1	0.0024243	NTM	3	0.00152504
																																							BTH	1	0.0024243	NTA	3	0.00152504
																																							PMI	1	0.0024243	HHA	3	0.00152504
																																							PL5	1	0.0024243	6MR	3	0.00152504
																																							PLI	1	0.0024243	SM2	3	0.00152504
																																							DA3	1	0.0024243	NRI	3	0.00152504
																																							PLS	1	0.0024243	47D	3	0.00152504
																																							D5M	1	0.0024243	GTB	3	0.00152504
																																							D54	1	0.0024243	APR	3	0.00152504
																																							D16	1	0.0024243	ALR	3	0.00152504
																																							D0U	1	0.0024243	NPX	3	0.00152504
																																							CYJ	1	0.0024243	433	3	0.00152504
																																							CPW	1	0.0024243	7ML	3	0.00152504
																																							CYG	1	0.0024243	NO9	3	0.00152504
																																							CYC	1	0.0024243	3VN	3	0.00152504
																																							PNN	1	0.0024243	4HE	3	0.00152504
																																							CXM	1	0.0024243	4HD	3	0.00152504
																																							CV2	1	0.0024243	78T	3	0.00152504
																																							CTP	1	0.0024243	4G7	3	0.00152504
																																							PP3	1	0.0024243	6MA	3	0.00152504
																																							CS2	1	0.0024243	ALO	3	0.00152504
																																							PJ7	1	0.0024243	ANN	3	0.00152504
																																							PHT	1	0.0024243	25L	2	0.00101669
																																							DAS	1	0.0024243	0CG	2	0.00101669
																																							DAU	1	0.0024243	042	2	0.00101669
																																							PAC	1	0.0024243	0CH	2	0.00101669
																																							DHK	1	0.0024243	EP2	2	0.00101669
																																							DHJ	1	0.0024243	EAH	2	0.00101669
																																							PBG	1	0.0024243	GP3	2	0.00101669
																																							PDA	1	0.0024243	24I	2	0.00101669
																																							DGI	1	0.0024243	EH3	2	0.00101669
																																							DG2	1	0.0024243	0A1	2	0.00101669
																																							PEZ	1	0.0024243	04J	2	0.00101669
																																							DDW	1	0.0024243	GOG	2	0.00101669
																																							DDG	1	0.0024243	EP0	2	0.00101669
																																							DDD	1	0.0024243	077	2	0.00101669
																																							PGA	1	0.0024243	EF1	2	0.00101669
																																							DCJ	1	0.0024243	GPC	2	0.00101669
																																							PHB	1	0.0024243	GOM	2	0.00101669
																																							DBS	1	0.0024243	EHA	2	0.00101669
																																							DBH	1	0.0024243	0CJ	2	0.00101669
																																							DBD	1	0.0024243	GPE	2	0.00101669
																																							CQZ	1	0.0024243	GNY	2	0.00101669
																																							CPS	1	0.0024243	EN0	2	0.00101669
																																							P7S	1	0.0024243	EE1	2	0.00101669
																																							C21	1	0.0024243	0CM	2	0.00101669
																																							C98	1	0.0024243	GM7	2	0.00101669
																																							C6P	1	0.0024243	0CN	2	0.00101669
																																							C6L	1	0.0024243	GNV	2	0.00101669
																																							PT1	1	0.0024243	GCV	2	0.00101669
																																							PTG	1	0.0024243	0GA	2	0.00101669
																																							C2U	1	0.0024243	G3H	2	0.00101669
																																							C2R	1	0.0024243	FVZ	2	0.00101669
																																							C2G	1	0.0024243	FX4	2	0.00101669
																																							PVQ	1	0.0024243	0UM	2	0.00101669
																																							CP5	1	0.0024243	1FZ	2	0.00101669
																																							C0V	1	0.0024243	FBD	2	0.00101669
																																							PXH	1	0.0024243	1HN	2	0.00101669
																																							BZP	1	0.0024243	0SL	2	0.00101669
																																							BYS	1	0.0024243	0HG	2	0.00101669
																																							PY6	1	0.0024243	0R7	2	0.00101669
																																							BXA	1	0.0024243	G8W	2	0.00101669
																																							BVS	1	0.0024243	0R6	2	0.00101669
																																							Q01	1	0.0024243	0R5	2	0.00101669
																																							PSF	1	0.0024243	0O3	2	0.00101669
																																							CAS	1	0.0024243	0ND	2	0.00101669
																																							CB3	1	0.0024243	0WO	2	0.00101669
																																							CB4	1	0.0024243	FCG	2	0.00101669
																																							CP	1	0.0024243	FVW	2	0.00101669
																																							COM	1	0.0024243	FVF	2	0.00101669
																																							COL	1	0.0024243	FUJ	2	0.00101669
																																							COH	1	0.0024243	FTV	2	0.00101669
																																							PPE	1	0.0024243	25P	2	0.00101669
																																							PPG	1	0.0024243	143	2	0.00101669
																																							CO2	1	0.0024243	161	2	0.00101669
																																							CNP	1	0.0024243	FLR	2	0.00101669
																																							CNA	1	0.0024243	FLF	2	0.00101669
																																							CN6	1	0.0024243	164	2	0.00101669
																																							CN3	1	0.0024243	FJP	2	0.00101669
																																							PPH	1	0.0024243	FFO	2	0.00101669
																																							CKQ	1	0.0024243	FIX	2	0.00101669
																																							CIC	1	0.0024243	17C	2	0.00101669
																																							PPY	1	0.0024243	FH9	2	0.00101669
																																							PR4	1	0.0024243	F8G	2	0.00101669
																																							CFX	1	0.0024243	1NH	2	0.00101669
																																							DIF	1	0.0024243	1NY	2	0.00101669
																																							P5W	1	0.0024243	0K7	2	0.00101669
																																							FDA	1	0.0024243	GLP	2	0.00101669
																																							O7Z	1	0.0024243	0HO	2	0.00101669
																																							EPR	1	0.0024243	GLJ	2	0.00101669
																																							EPH	1	0.0024243	GL1	2	0.00101669
																																							NWD	1	0.0024243	GJS	2	0.00101669
																																							NXA	1	0.0024243	GHM	2	0.00101669
																																							NXT	1	0.0024243	GGL	2	0.00101669
																																							ENY	1	0.0024243	GGB	2	0.00101669
																																							O2V	1	0.0024243	EPU	2	0.00101669
																																							ENL	1	0.0024243	EQV	2	0.00101669
																																							OAI	1	0.0024243	GFB	2	0.00101669
																																							EAL	1	0.0024243	GEM	2	0.00101669
																																							EKD	1	0.0024243	GEL	2	0.00101669
																																							EK8	1	0.0024243	208	2	0.00101669
																																							EIP	1	0.0024243	EVM	2	0.00101669
																																							EHS	1	0.0024243	1OT	2	0.00101669
																																							EHA	1	0.0024243	0KL	2	0.00101669
																																							EGV	1	0.0024243	1VU	2	0.00101669
																																							OBS	1	0.0024243	0L3	2	0.00101669
																																							ED1	1	0.0024243	0L4	2	0.00101669
																																							EPS	1	0.0024243	0L5	2	0.00101669
																																							NVU	1	0.0024243	18T	2	0.00101669
																																							EU8	1	0.0024243	1SH	2	0.00101669
																																							EVA	1	0.0024243	GCP	2	0.00101669
																																							NJ5	1	0.0024243	GBZ	2	0.00101669
																																							FBK	1	0.0024243	0L6	2	0.00101669
																																							FBG	1	0.0024243	0L7	2	0.00101669
																																							NLP	1	0.0024243	1OU	2	0.00101669
																																							F6R	1	0.0024243	0LA	2	0.00101669
																																							NLQ	1	0.0024243	0N2	2	0.00101669
																																							F49	1	0.0024243	E79	2	0.00101669
																																							NPA	1	0.0024243	6OC	2	0.00101669
																																							NTA	1	0.0024243	E1U	2	0.00101669
																																							F2R	1	0.0024243	E1C	2	0.00101669
																																							NUK	1	0.0024243	AHD	2	0.00101669
																																							EYY	1	0.0024243	AGW	2	0.00101669
																																							EYM	1	0.0024243	AGR	2	0.00101669
																																							EYJ	1	0.0024243	AGF	2	0.00101669
																																							EYA	1	0.0024243	AFS	2	0.00101669
																																							EY7	1	0.0024243	4KJ	2	0.00101669
																																							EVB	1	0.0024243	4LM	2	0.00101669
																																							ECD	1	0.0024243	4ML	2	0.00101669
																																							OCA	1	0.0024243	4MX	2	0.00101669
																																							P20	1	0.0024243	4OP	2	0.00101669
																																							DO1	1	0.0024243	4OX	2	0.00101669
																																							DQM	1	0.0024243	4TG	2	0.00101669
																																							DQA	1	0.0024243	ABT	2	0.00101669
																																							OTP	1	0.0024243	511	2	0.00101669
																																							OUB	1	0.0024243	A3R	2	0.00101669
																																							OX1	1	0.0024243	A2H	2	0.00101669
																																							OXD	1	0.0024243	A1Z	2	0.00101669
																																							OXM	1	0.0024243	9YK	2	0.00101669
																																							DOC	1	0.0024243	9YD	2	0.00101669
																																							DNY	1	0.0024243	9Y7	2	0.00101669
																																							E5X	1	0.0024243	574	2	0.00101669
																																							DNV	1	0.0024243	9TB	2	0.00101669
																																							P0S	1	0.0024243	9SE	2	0.00101669
																																							DN4	1	0.0024243	9RC	2	0.00101669
																																							DMG	1	0.0024243	9PI	2	0.00101669
																																							DMA	1	0.0024243	9OT	2	0.00101669
																																							DLJ	1	0.0024243	9OQ	2	0.00101669
																																							DKV	1	0.0024243	AHQ	2	0.00101669
																																							DKS	1	0.0024243	AIO	2	0.00101669
																																							DQP	1	0.0024243	AJH	2	0.00101669
																																							OPE	1	0.0024243	AR8	2	0.00101669
																																							DS4	1	0.0024243	B88	2	0.00101669
																																							OPA	1	0.0024243	B16	2	0.00101669
																																							E42	1	0.0024243	B12	2	0.00101669
																																							E1U	1	0.0024243	AXY	2	0.00101669
																																							E0N	1	0.0024243	3QP	2	0.00101669
																																							DZM	1	0.0024243	3S0	2	0.00101669
																																							DZA	1	0.0024243	AVI	2	0.00101669
																																							OFF	1	0.0024243	AUL	2	0.00101669
																																							DYN	1	0.0024243	AT4	2	0.00101669
																																							OHP	1	0.0024243	3SU	2	0.00101669
																																							OI7	1	0.0024243	3UC	2	0.00101669
																																							OK3	1	0.0024243	ARK	2	0.00101669
																																							OKP	1	0.0024243	AQQ	2	0.00101669
																																							OLC	1	0.0024243	4HG	2	0.00101669
																																							DWZ	1	0.0024243	AQK	2	0.00101669
																																							DV6	1	0.0024243	46D	2	0.00101669
																																							OMC	1	0.0024243	APG	2	0.00101669
																																							DTR	1	0.0024243	APA	2	0.00101669
																																							OP0	1	0.0024243	48Y	2	0.00101669
																																							GAZ	1	0.0024243	AN1	2	0.00101669
																																										4A3	2	0.00101669
																																										AMU	2	0.00101669
																																										AMH	2	0.00101669
																																										ALX	2	0.00101669
																																										ALQ	2	0.00101669
																																										4BQ	2	0.00101669
																																										9O3	2	0.00101669
																																										9NO	2	0.00101669
																																										9LZ	2	0.00101669
																																										7MK	2	0.00101669
																																										7VD	2	0.00101669
																																										686	2	0.00101669
																																										699	2	0.00101669
																																										6CO	2	0.00101669
																																										6CQ	2	0.00101669
																																										6D6	2	0.00101669
																																										6HE	2	0.00101669
																																										6HY	2	0.00101669
																																										7SX	2	0.00101669
																																										6KB	2	0.00101669
																																										6KJ	2	0.00101669
																																										6M4	2	0.00101669
																																										7MF	2	0.00101669
																																										840	2	0.00101669
																																										7IA	2	0.00101669
																																										7B6	2	0.00101669
																																										78A	2	0.00101669
																																										76V	2	0.00101669
																																										76R	2	0.00101669
																																										75V	2	0.00101669
																																										73P	2	0.00101669
																																										72J	2	0.00101669
																																										6YW	2	0.00101669
																																										6SG	2	0.00101669
																																										6RP	2	0.00101669
																																										6QR	2	0.00101669
																																										7WV	2	0.00101669
																																										66B	2	0.00101669
																																										9CJ	2	0.00101669
																																										8EO	2	0.00101669
																																										9B3	2	0.00101669
																																										93A	2	0.00101669
																																										5AU	2	0.00101669
																																										91T	2	0.00101669
																																										5BC	2	0.00101669
																																										8YF	2	0.00101669
																																										8XQ	2	0.00101669
																																										5DK	2	0.00101669
																																										8N9	2	0.00101669
																																										8JG	2	0.00101669
																																										5MY	2	0.00101669
																																										5OL	2	0.00101669
																																										5OX	2	0.00101669
																																										65W	2	0.00101669
																																										8DM	2	0.00101669
																																										5SI	2	0.00101669
																																										5SP	2	0.00101669
																																										89V	2	0.00101669
																																										89R	2	0.00101669
																																										88V	2	0.00101669
																																										5X8	2	0.00101669
																																										5XR	2	0.00101669
																																										88B	2	0.00101669
																																										5XW	2	0.00101669
																																										5YQ	2	0.00101669
																																										87O	2	0.00101669
																																										B9Z	2	0.00101669
																																										BC8	2	0.00101669
																																										3NF	2	0.00101669
																																										D0U	2	0.00101669
																																										DDW	2	0.00101669
																																										2G4	2	0.00101669
																																										DDK	2	0.00101669
																																										2G5	2	0.00101669
																																										2GB	2	0.00101669
																																										2GR	2	0.00101669
																																										2H9	2	0.00101669
																																										DAR	2	0.00101669
																																										2MX	2	0.00101669
																																										D6E	2	0.00101669
																																										2NO	2	0.00101669
																																										D16	2	0.00101669
																																										CYU	2	0.00101669
																																										2F7	2	0.00101669
																																										2QM	2	0.00101669
																																										2QN	2	0.00101669
																																										2QP	2	0.00101669
																																										CYK	2	0.00101669
																																										2QQ	2	0.00101669
																																										CXM	2	0.00101669
																																										CTW	2	0.00101669
																																										2QR	2	0.00101669
																																										CTG	2	0.00101669
																																										2R7	2	0.00101669
																																										2VD	2	0.00101669
																																										CQB	2	0.00101669
																																										2F9	2	0.00101669
																																										2E7	2	0.00101669
																																										2VG	2	0.00101669
																																										29D	2	0.00101669
																																										281	2	0.00101669
																																										E0T	2	0.00101669
																																										E0Q	2	0.00101669
																																										DZF	2	0.00101669
																																										DYV	2	0.00101669
																																										DY8	2	0.00101669
																																										28Z	2	0.00101669
																																										DXL	2	0.00101669
																																										29C	2	0.00101669
																																										DWQ	2	0.00101669
																																										DWN	2	0.00101669
																																										DV6	2	0.00101669
																																										DST	2	0.00101669
																																										DGQ	2	0.00101669
																																										DSB	2	0.00101669
																																										DRJ	2	0.00101669
																																										DRH	2	0.00101669
																																										DRD	2	0.00101669
																																										DQM	2	0.00101669
																																										2CO	2	0.00101669
																																										DOY	2	0.00101669
																																										DLL	2	0.00101669
																																										DIU	2	0.00101669
																																										DHJ	2	0.00101669
																																										DHG	2	0.00101669
																																										DH1	2	0.00101669
																																										CP3	2	0.00101669
																																										CP	2	0.00101669
																																										BCO	2	0.00101669
																																										BMR	2	0.00101669
																																										35K	2	0.00101669
																																										BZB	2	0.00101669
																																										BYS	2	0.00101669
																																										BXK	2	0.00101669
																																										BVX	2	0.00101669
																																										BVT	2	0.00101669
																																										BUJ	2	0.00101669
																																										BTW	2	0.00101669
																																										BSG	2	0.00101669
																																										BSF	2	0.00101669
																																										BQU	2	0.00101669
																																										3BI	2	0.00101669
																																										3DJ	2	0.00101669
																																										C01	2	0.00101669
																																										3EA	2	0.00101669
																																										3EB	2	0.00101669
																																										BIP	2	0.00101669
																																										BHX	2	0.00101669
																																										BHR	2	0.00101669
																																										BHI	2	0.00101669
																																										BHC	2	0.00101669
																																										BH8	2	0.00101669
																																										BGP	2	0.00101669
																																										BFL	2	0.00101669
																																										BE2	2	0.00101669
																																										BDS	2	0.00101669
																																										35G	2	0.00101669
																																										34H	2	0.00101669
																																										COS	2	0.00101669
																																										CIC	2	0.00101669
																																										COO	2	0.00101669
																																										2VM	2	0.00101669
																																										2VS	2	0.00101669
																																										CNA	2	0.00101669
																																										2W2	2	0.00101669
																																										CMK	2	0.00101669
																																										2W8	2	0.00101669
																																										CM2	2	0.00101669
																																										CM1	2	0.00101669
																																										2W9	2	0.00101669
																																										CIZ	2	0.00101669
																																										2WB	2	0.00101669
																																										CI9	2	0.00101669
																																										C0O	2	0.00101669
																																										CGV	2	0.00101669
																																										CGA	2	0.00101669
																																										2WW	2	0.00101669
																																										CDI	2	0.00101669
																																										6NA	2	0.00101669
																																										2YB	2	0.00101669
																																										33P	2	0.00101669
																																										C68	2	0.00101669
																																										C3G	2	0.00101669
																																										C2U	2	0.00101669
																																										C2F	2	0.00101669
																																										C26	2	0.00101669
																																										CB4	2	0.00101669
																																										ZZH	2	0.00101669
																																										OOP	2	0.00101669
																																										LA9	2	0.00101669
																																										SSN	2	0.00101669
																																										LLH	2	0.00101669
																																										LK3	2	0.00101669
																																										LHY	2	0.00101669
																																										SZH	2	0.00101669
																																										LHT	2	0.00101669
																																										LHO	2	0.00101669
																																										LHK	2	0.00101669
																																										LDK	2	0.00101669
																																										LDE	2	0.00101669
																																										LAO	2	0.00101669
																																										LAH	2	0.00101669
																																										LA6	2	0.00101669
																																										LM8	2	0.00101669
																																										T3A	2	0.00101669
																																										L8P	2	0.00101669
																																										L6S	2	0.00101669
																																										L4Z	2	0.00101669
																																										T4F	2	0.00101669
																																										T57	2	0.00101669
																																										T65	2	0.00101669
																																										L4E	2	0.00101669
																																										T6P	2	0.00101669
																																										T6Z	2	0.00101669
																																										L2M	2	0.00101669
																																										L2D	2	0.00101669
																																										SSI	2	0.00101669
																																										SOP	2	0.00101669
																																										SDR	2	0.00101669
																																										M43	2	0.00101669
																																										MCR	2	0.00101669
																																										MCO	2	0.00101669
																																										SHV	2	0.00101669
																																										SIF	2	0.00101669
																																										SIM	2	0.00101669
																																										SJ5	2	0.00101669
																																										SKD	2	0.00101669
																																										SKG	2	0.00101669
																																										SKJ	2	0.00101669
																																										SKZ	2	0.00101669
																																										M74	2	0.00101669
																																										M6D	2	0.00101669
																																										M3S	2	0.00101669
																																										SMG	2	0.00101669
																																										M3R	2	0.00101669
																																										M3L	2	0.00101669
																																										SLB	2	0.00101669
																																										M2P	2	0.00101669
																																										SLO	2	0.00101669
																																										M1P	2	0.00101669
																																										SLT	2	0.00101669
																																										LW8	2	0.00101669
																																										SM3	2	0.00101669
																																										LU0	2	0.00101669
																																										LTX	2	0.00101669
																																										LPA	2	0.00101669
																																										TAT	2	0.00101669
																																										KYK	2	0.00101669
																																										KVP	2	0.00101669
																																										UFT	2	0.00101669
																																										JYD	2	0.00101669
																																										JX5	2	0.00101669
																																										U5F	2	0.00101669
																																										JTA	2	0.00101669
																																										JSQ	2	0.00101669
																																										JRG	2	0.00101669
																																										JQZ	2	0.00101669
																																										UA3	2	0.00101669
																																										UAG	2	0.00101669
																																										UAH	2	0.00101669
																																										UCG	2	0.00101669
																																										JMS	2	0.00101669
																																										UGC	2	0.00101669
																																										KT5	2	0.00101669
																																										UMF	2	0.00101669
																																										UML	2	0.00101669
																																										UN1	2	0.00101669
																																										JKE	2	0.00101669
																																										UPA	2	0.00101669
																																										JB7	2	0.00101669
																																										JAA	2	0.00101669
																																										J96	2	0.00101669
																																										J7B	2	0.00101669
																																										J42	2	0.00101669
																																										J37	2	0.00101669
																																										J35	2	0.00101669
																																										U1P	2	0.00101669
																																										K8D	2	0.00101669
																																										K8G	2	0.00101669
																																										TWB	2	0.00101669
																																										KT3	2	0.00101669
																																										KRZ	2	0.00101669
																																										TD6	2	0.00101669
																																										TD9	2	0.00101669
																																										KRG	2	0.00101669
																																										KPV	2	0.00101669
																																										KNW	2	0.00101669
																																										TDO	2	0.00101669
																																										KED	2	0.00101669
																																										KDN	2	0.00101669
																																										TDX	2	0.00101669
																																										THD	2	0.00101669
																																										THW	2	0.00101669
																																										THY	2	0.00101669
																																										TK4	2	0.00101669
																																										KCH	2	0.00101669
																																										TLF	2	0.00101669
																																										TP4	2	0.00101669
																																										TP8	2	0.00101669
																																										TR5	2	0.00101669
																																										TRC	2	0.00101669
																																										TTD	2	0.00101669
																																										K8V	2	0.00101669
																																										TV1	2	0.00101669
																																										K8J	2	0.00101669
																																										MD3	2	0.00101669
																																										SCD	2	0.00101669
																																										J31	2	0.00101669
																																										Q04	2	0.00101669
																																										OOG	2	0.00101669
																																										PTG	2	0.00101669
																																										PUA	2	0.00101669
																																										OMD	2	0.00101669
																																										OMC	2	0.00101669
																																										OKD	2	0.00101669
																																										OKA	2	0.00101669
																																										PX8	2	0.00101669
																																										OK3	2	0.00101669
																																										OJQ	2	0.00101669
																																										Q03	2	0.00101669
																																										OHH	2	0.00101669
																																										Q06	2	0.00101669
																																										PPR	2	0.00101669
																																										Q07	2	0.00101669
																																										Q08	2	0.00101669
																																										Q4T	2	0.00101669
																																										QAS	2	0.00101669
																																										O2V	2	0.00101669
																																										O2S	2	0.00101669
																																										QAT	2	0.00101669
																																										QCQ	2	0.00101669
																																										NYZ	2	0.00101669
																																										QDH	2	0.00101669
																																										NVA	2	0.00101669
																																										NQD	2	0.00101669
																																										GSF	2	0.00101669
																																										ORX	2	0.00101669
																																										ME6	2	0.00101669
																																										P5D	2	0.00101669
																																										PAY	2	0.00101669
																																										PAN	2	0.00101669
																																										PBU	2	0.00101669
																																										PAL	2	0.00101669
																																										PAH	2	0.00101669
																																										P9T	2	0.00101669
																																										P9C	2	0.00101669
																																										P8M	2	0.00101669
																																										P8D	2	0.00101669
																																										P6L	2	0.00101669
																																										PFF	2	0.00101669
																																										P5F	2	0.00101669
																																										P4D	2	0.00101669
																																										PPC	2	0.00101669
																																										P3M	2	0.00101669
																																										PGH	2	0.00101669
																																										P25	2	0.00101669
																																										P23	2	0.00101669
																																										PHT	2	0.00101669
																																										P1J	2	0.00101669
																																										P0S	2	0.00101669
																																										PIO	2	0.00101669
																																										PIZ	2	0.00101669
																																										P0H	2	0.00101669
																																										P0A	2	0.00101669
																																										OZP	2	0.00101669
																																										NPW	2	0.00101669
																																										NPA	2	0.00101669
																																										NO5	2	0.00101669
																																										MP5	2	0.00101669
																																										RMN	2	0.00101669
																																										N1T	2	0.00101669
																																										N04	2	0.00101669
																																										N01	2	0.00101669
																																										MYZ	2	0.00101669
																																										MUD	2	0.00101669
																																										MUC	2	0.00101669
																																										MTV	2	0.00101669
																																										MSS	2	0.00101669
																																										MS0	2	0.00101669
																																										RRG	2	0.00101669
																																										MPH	2	0.00101669
																																										RUR	2	0.00101669
																																										NN3	2	0.00101669
																																										MNB	2	0.00101669
																																										MNA	2	0.00101669
																																										MLD	2	0.00101669
																																										S2X	2	0.00101669
																																										S37	2	0.00101669
																																										S3B	2	0.00101669
																																										S44	2	0.00101669
																																										MH0	2	0.00101669
																																										MGP	2	0.00101669
																																										S7B	2	0.00101669
																																										SAR	2	0.00101669
																																										MEZ	2	0.00101669
																																										N3A	2	0.00101669
																																										N5F	2	0.00101669
																																										N79	2	0.00101669
																																										N87	2	0.00101669
																																										NM2	2	0.00101669
																																										QRG	2	0.00101669
																																										NKS	2	0.00101669
																																										QTT	2	0.00101669
																																										NKQ	2	0.00101669
																																										NKP	2	0.00101669
																																										NKO	2	0.00101669
																																										NJS	2	0.00101669
																																										R1T	2	0.00101669
																																										R3W	2	0.00101669
																																										NHW	2	0.00101669
																																										NHS	2	0.00101669
																																										NHR	2	0.00101669
																																										NHC	2	0.00101669
																																										R52	2	0.00101669
																																										NGE	2	0.00101669
																																										NG3	2	0.00101669
																																										RC4	2	0.00101669
																																										NFL	2	0.00101669
																																										NES	2	0.00101669
																																										RCL	2	0.00101669
																																										REA	2	0.00101669
																																										RHE	2	0.00101669
																																										RHO	2	0.00101669
																																										N95	2	0.00101669
																																										J34	2	0.00101669
																																										LFF	2	0.00101669
																																										PAZ	2	0.00101669
																																										VIO	2	0.00101669
																																										I2E	2	0.00101669
																																										I2M	2	0.00101669
																																										WWF	2	0.00101669
																																										YXS	2	0.00101669
																																										YZE	2	0.00101669
																																										I3C	2	0.00101669
																																										HDL	2	0.00101669
																																										HCT	2	0.00101669
																																										HCO	2	0.00101669
																																										I4P	2	0.00101669
																																										I58	2	0.00101669
																																										IAC	2	0.00101669
																																										Z90	2	0.00101669
																																										WQS	2	0.00101669
																																										HC7	2	0.00101669
																																										HBU	2	0.00101669
																																										HB8	2	0.00101669
																																										HA0	2	0.00101669
																																										IK4	2	0.00101669
																																										ZAA	2	0.00101669
																																										W7E	2	0.00101669
																																										ZES	2	0.00101669
																																										ZGA	2	0.00101669
																																										H6Q	2	0.00101669
																																										VSV	2	0.00101669
																																										VQV	2	0.00101669
																																										H6B	2	0.00101669
																																										IP9	2	0.00101669
																																										VNR	2	0.00101669
																																										YPA	2	0.00101669
																																										X1P	2	0.00101669
																																										YOF	2	0.00101669
																																										HSX	2	0.00101669
																																										HNN	2	0.00101669
																																										Y01	2	0.00101669
																																										HKY	2	0.00101669
																																										XQB	2	0.00101669
																																										HPI	2	0.00101669
																																										HI5	2	0.00101669
																																										HPK	2	0.00101669
																																										HHZ	2	0.00101669
																																										XP5	2	0.00101669
																																										YBY	2	0.00101669
																																										YC2	2	0.00101669
																																										XJE	2	0.00101669
																																										HS2	2	0.00101669
																																										XCX	2	0.00101669
																																										HFM	2	0.00101669
																																										XBR	2	0.00101669
																																										HGY	2	0.00101669
																																										HXB	2	0.00101669
																																										HXD	2	0.00101669
																																										XBP	2	0.00101669
																																										HXZ	2	0.00101669
																																										X3J	2	0.00101669
																																										HGA	2	0.00101669
																																										X1S	2	0.00101669
																																										HFQ	2	0.00101669
																																										HFP	2	0.00101669
																																										X1R	2	0.00101669
																																										YKG	2	0.00101669
																																										VKE	2	0.00101669
																																										HCH	2	0.00101669
																																										V9G	2	0.00101669
																																										ZZ0	2	0.00101669
																																										ITW	2	0.00101669
																																										V24	2	0.00101669
																																										ITB	2	0.00101669
																																										GTV	2	0.00101669
																																										ZXM	2	0.00101669
																																										GUX	2	0.00101669
																																										J21	2	0.00101669
																																										GSN	2	0.00101669
																																										ITA	2	0.00101669
																																										VGX	2	0.00101669
																																										ZYF	2	0.00101669
																																										UVW	2	0.00101669
																																										ITP	2	0.00101669
																																										GWX	2	0.00101669
																																										GZ8	2	0.00101669
																																										H01	2	0.00101669
																																										V77	2	0.00101669
																																										ZYG	2	0.00101669
																																										VAO	2	0.00101669
																																										J1I	2	0.00101669
																																										RCF	1	0.000508347
																																										6C1	1	0.000508347
																																										8RK	1	0.000508347
																																										03S	1	0.000508347
																																										6CN	1	0.000508347
																																										6MZ	1	0.000508347
																																										0LD	1	0.000508347
																																										PDI	1	0.000508347
																																										RCC	1	0.000508347
																																										RCI	1	0.000508347
																																										6B9	1	0.000508347
																																										8U8	1	0.000508347
																																										YC8	1	0.000508347
																																										6AU	1	0.000508347
																																										RE9	1	0.000508347
																																										8UX	1	0.000508347
																																										0PA	1	0.000508347
																																										8V6	1	0.000508347
																																										68Z	1	0.000508347
																																										REX	1	0.000508347
																																										YOK	1	0.000508347
																																										8XO	1	0.000508347
																																										0O2	1	0.000508347
																																										R10	1	0.000508347
																																										0NG	1	0.000508347
																																										6JN	1	0.000508347
																																										6LM	1	0.000508347
																																										PEH	1	0.000508347
																																										R29	1	0.000508347
																																										QZQ	1	0.000508347
																																										6K8	1	0.000508347
																																										0N3	1	0.000508347
																																										0N4	1	0.000508347
																																										8R5	1	0.000508347
																																										0NA	1	0.000508347
																																										6JY	1	0.000508347
																																										8R8	1	0.000508347
																																										R40	1	0.000508347
																																										PEQ	1	0.000508347
																																										YJM	1	0.000508347
																																										YFF	1	0.000508347
																																										6GB	1	0.000508347
																																										QXM	1	0.000508347
																																										RGE	1	0.000508347
																																										R5I	1	0.000508347
																																										6MW	1	0.000508347
																																										R99	1	0.000508347
																																										8RB	1	0.000508347
																																										RC1	1	0.000508347
																																										6CS	1	0.000508347
																																										0NE	1	0.000508347
																																										PHD	1	0.000508347
																																										0R2	1	0.000508347
																																										RHN	1	0.000508347
																																										01B	1	0.000508347
																																										5Q1	1	0.000508347
																																										5PY	1	0.000508347
																																										5PV	1	0.000508347
																																										5PU	1	0.000508347
																																										Y03	1	0.000508347
																																										5PL	1	0.000508347
																																										5P3	1	0.000508347
																																										RTE	1	0.000508347
																																										RTF	1	0.000508347
																																										0XU	1	0.000508347
																																										5NJ	1	0.000508347
																																										RVA	1	0.000508347
																																										5KJ	1	0.000508347
																																										0Y7	1	0.000508347
																																										XYT	1	0.000508347
																																										5JV	1	0.000508347
																																										RVB	1	0.000508347
																																										RVC	1	0.000508347
																																										5HU	1	0.000508347
																																										RVD	1	0.000508347
																																										0ZN	1	0.000508347
																																										5GY	1	0.000508347
																																										RVE	1	0.000508347
																																										RX4	1	0.000508347
																																										S1P	1	0.000508347
																																										5EY	1	0.000508347
																																										5EJ	1	0.000508347
																																										PB1	1	0.000508347
																																										0WK	1	0.000508347
																																										RR1	1	0.000508347
																																										RQ4	1	0.000508347
																																										0RV	1	0.000508347
																																										0R3	1	0.000508347
																																										6NR	1	0.000508347
																																										RK4	1	0.000508347
																																										PDE	1	0.000508347
																																										RKY	1	0.000508347
																																										PD7	1	0.000508347
																																										5ZZ	1	0.000508347
																																										RL2	1	0.000508347
																																										Y09	1	0.000508347
																																										0RD	1	0.000508347
																																										0RK	1	0.000508347
																																										PCF	1	0.000508347
																																										0RM	1	0.000508347
																																										RPM	1	0.000508347
																																										5SV	1	0.000508347
																																										5XB	1	0.000508347
																																										RQ1	1	0.000508347
																																										0RY	1	0.000508347
																																										Y07	1	0.000508347
																																										PC1	1	0.000508347
																																										5UK	1	0.000508347
																																										5UF	1	0.000508347
																																										Y06	1	0.000508347
																																										0TD	1	0.000508347
																																										03H	1	0.000508347
																																										01K	1	0.000508347
																																										5TZ	1	0.000508347
																																										Y04	1	0.000508347
																																										RJP	1	0.000508347
																																										YRR	1	0.000508347
																																										6O5	1	0.000508347
																																										PQT	1	0.000508347
																																										PNF	1	0.000508347
																																										PNM	1	0.000508347
																																										7UZ	1	0.000508347
																																										POI	1	0.000508347
																																										PPB	1	0.000508347
																																										0F1	1	0.000508347
																																										8GM	1	0.000508347
																																										PG8	1	0.000508347
																																										PPJ	1	0.000508347
																																										PPQ	1	0.000508347
																																										0FV	1	0.000508347
																																										8HQ	1	0.000508347
																																										ZER	1	0.000508347
																																										PR7	1	0.000508347
																																										7WR	1	0.000508347
																																										PRS	1	0.000508347
																																										PRX	1	0.000508347
																																										ZEM	1	0.000508347
																																										ZAN	1	0.000508347
																																										0HH	1	0.000508347
																																										0HN	1	0.000508347
																																										8ID	1	0.000508347
																																										PUP	1	0.000508347
																																										PVG	1	0.000508347
																																										ZAF	1	0.000508347
																																										0HV	1	0.000508347
																																										PXP	1	0.000508347
																																										7P3	1	0.000508347
																																										7WH	1	0.000508347
																																										PNE	1	0.000508347
																																										04M	1	0.000508347
																																										8A1	1	0.000508347
																																										ZVY	1	0.000508347
																																										8EF	1	0.000508347
																																										8EQ	1	0.000508347
																																										8E9	1	0.000508347
																																										ZND	1	0.000508347
																																										ZGR	1	0.000508347
																																										PHW	1	0.000508347
																																										8D4	1	0.000508347
																																										8CS	1	0.000508347
																																										8EX	1	0.000508347
																																										ZXG	1	0.000508347
																																										8CA	1	0.000508347
																																										PHY	1	0.000508347
																																										PIF	1	0.000508347
																																										0EG	1	0.000508347
																																										ZGC	1	0.000508347
																																										ZGB	1	0.000508347
																																										PIS	1	0.000508347
																																										0DB	1	0.000508347
																																										PGG	1	0.000508347
																																										PJ7	1	0.000508347
																																										PLC	1	0.000508347
																																										PLD	1	0.000508347
																																										PMI	1	0.000508347
																																										PMS	1	0.000508347
																																										PNB	1	0.000508347
																																										PNC	1	0.000508347
																																										7XF	1	0.000508347
																																										ZA4	1	0.000508347
																																										7P2	1	0.000508347
																																										Z99	1	0.000508347
																																										QGS	1	0.000508347
																																										6Z1	1	0.000508347
																																										QDM	1	0.000508347
																																										8JX	1	0.000508347
																																										6XR	1	0.000508347
																																										8K0	1	0.000508347
																																										6UN	1	0.000508347
																																										6U6	1	0.000508347
																																										6U0	1	0.000508347
																																										6T7	1	0.000508347
																																										6SJ	1	0.000508347
																																										QG2	1	0.000508347
																																										0L0	1	0.000508347
																																										8K1	1	0.000508347
																																										QIC	1	0.000508347
																																										7O4	1	0.000508347
																																										QLI	1	0.000508347
																																										0L1	1	0.000508347
																																										8KS	1	0.000508347
																																										6Q7	1	0.000508347
																																										8ML	1	0.000508347
																																										6Q5	1	0.000508347
																																										QNM	1	0.000508347
																																										PFN	1	0.000508347
																																										059	1	0.000508347
																																										PHI	1	0.000508347
																																										6P3	1	0.000508347
																																										QT8	1	0.000508347
																																										6OA	1	0.000508347
																																										8JR	1	0.000508347
																																										720	1	0.000508347
																																										Z3P	1	0.000508347
																																										105	1	0.000508347
																																										PY5	1	0.000508347
																																										PYO	1	0.000508347
																																										Q01	1	0.000508347
																																										0K5	1	0.000508347
																																										Z98	1	0.000508347
																																										7HE	1	0.000508347
																																										7GU	1	0.000508347
																																										0KB	1	0.000508347
																																										7BN	1	0.000508347
																																										0KC	1	0.000508347
																																										7B8	1	0.000508347
																																										0KE	1	0.000508347
																																										Q0P	1	0.000508347
																																										0KG	1	0.000508347
																																										Q5G	1	0.000508347
																																										Q5M	1	0.000508347
																																										77E	1	0.000508347
																																										PFU	1	0.000508347
																																										76U	1	0.000508347
																																										8JJ	1	0.000508347
																																										0KH	1	0.000508347
																																										8JL	1	0.000508347
																																										QC1	1	0.000508347
																																										754	1	0.000508347
																																										QC2	1	0.000508347
																																										8JO	1	0.000508347
																																										73B	1	0.000508347
																																										5D5	1	0.000508347
																																										2D8	1	0.000508347
																																										5CS	1	0.000508347
																																										1TP	1	0.000508347
																																										2YN	1	0.000508347
																																										VTB	1	0.000508347
																																										VUR	1	0.000508347
																																										2YP	1	0.000508347
																																										2YR	1	0.000508347
																																										VWS	1	0.000508347
																																										TDN	1	0.000508347
																																										1WB	1	0.000508347
																																										31B	1	0.000508347
																																										VWW	1	0.000508347
																																										TDL	1	0.000508347
																																										1QL	1	0.000508347
																																										TDA	1	0.000508347
																																										W05	1	0.000508347
																																										TDW	1	0.000508347
																																										2X3	1	0.000508347
																																										TCE	1	0.000508347
																																										210	1	0.000508347
																																										2UJ	1	0.000508347
																																										2V8	1	0.000508347
																																										21V	1	0.000508347
																																										2VE	1	0.000508347
																																										2VF	1	0.000508347
																																										TNV	1	0.000508347
																																										VPD	1	0.000508347
																																										TEG	1	0.000508347
																																										TKW	1	0.000508347
																																										1YJ	1	0.000508347
																																										1YE	1	0.000508347
																																										THN	1	0.000508347
																																										THH	1	0.000508347
																																										TG6	1	0.000508347
																																										W81	1	0.000508347
																																										WEF	1	0.000508347
																																										XYP	1	0.000508347
																																										3DS	1	0.000508347
																																										3BY	1	0.000508347
																																										3C7	1	0.000508347
																																										T5F	1	0.000508347
																																										3CR	1	0.000508347
																																										1MF	1	0.000508347
																																										T4K	1	0.000508347
																																										1M9	1	0.000508347
																																										WK1	1	0.000508347
																																										WMP	1	0.000508347
																																										3E9	1	0.000508347
																																										T4B	1	0.000508347
																																										1KJ	1	0.000508347
																																										T42	1	0.000508347
																																										T3P	1	0.000508347
																																										T5K	1	0.000508347
																																										WI2	1	0.000508347
																																										1OS	1	0.000508347
																																										TBE	1	0.000508347
																																										TBV	1	0.000508347
																																										35M	1	0.000508347
																																										35S	1	0.000508347
																																										1O6	1	0.000508347
																																										35T	1	0.000508347
																																										TBL	1	0.000508347
																																										1O1	1	0.000508347
																																										1NJ	1	0.000508347
																																										WG8	1	0.000508347
																																										38Y	1	0.000508347
																																										1NL	1	0.000508347
																																										TA8	1	0.000508347
																																										394	1	0.000508347
																																										1NK	1	0.000508347
																																										2TZ	1	0.000508347
																																										2TW	1	0.000508347
																																										2TQ	1	0.000508347
																																										2AX	1	0.000508347
																																										UP3	1	0.000508347
																																										UNK	1	0.000508347
																																										UNG	1	0.000508347
																																										2B5	1	0.000508347
																																										2FH	1	0.000508347
																																										2FO	1	0.000508347
																																										VA1	1	0.000508347
																																										2E5	1	0.000508347
																																										UEP	1	0.000508347
																																										UE1	1	0.000508347
																																										UD0	1	0.000508347
																																										VAE	1	0.000508347
[truncated: 862 more rows]
[truncated: 22 more columns]

## Sheet: anionType
	i						ii						iii						iv						v						vi						vii						rest
	A		B		C		A		B		C		A		B		C		A		B		C		A		B		C		A		B		C		A		B		C		A		B		C
Anion type	counts	%	counts	%	counts	%	counts	%	counts	%	counts	%	counts	%	counts	%	counts	%	counts	%	counts	%	counts	%	counts	%	counts	%	counts	%	counts	%	counts	%	counts	%	counts	%	counts	%	counts	%	counts	%	counts	%	counts	%
RNA	33	6.07735	48	2.84024	153	3.60934	9	3.96476	13	0.714678	37	0.539201	15	0.92707	40	0.839807	311	0.80447	113	13.5006	95	6.56985	319	6.55165	124	0.800465	167	0.404858	950	0.48293	125	51.0204	84	16.6008	515	16.3285	11	2.01835	11	0.794798	21	0.463065	858	5.20347	940	2.33546	2089	3.00135
DNA	0	0	7	0.414201	25	0.589762	0	0	4	0.219901	21	0.306033	8	0.494438	18	0.377913	459	1.1873	5	0.597372	28	1.93638	135	2.77264	119	0.768188	240	0.581832	1886	0.958743	6	2.44898	9	1.77866	27	0.856056	1	0.183486	1	0.0722543	52	1.14664	114	0.69137	282	0.700639	547	0.785897
protein	375	69.0608	1212	71.716	2203	51.9698	159	70.0441	1215	66.7949	3950	57.5634	1287	79.5426	4216	88.5156	31274	80.8971	561	67.0251	1126	77.87	3738	76.7714	12218	78.8716	34457	83.5341	159726	81.1962	84	34.2857	331	65.415	2025	64.2042	414	75.9633	1177	85.0434	3529	77.817	11951	72.4786	34699	86.2108	59079	84.8812
other	135	24.8619	423	25.0296	1858	43.8311	59	25.9912	587	32.2705	2854	41.5914	308	19.0358	489	10.2666	6615	17.1112	158	18.8769	197	13.6238	677	13.9043	3030	19.5597	6385	15.4792	34154	17.3621	30	12.2449	82	16.2055	587	18.6113	119	21.8349	195	14.0896	933	20.5733	3566	21.6265	4328	10.7531	7887	11.3316

## Sheet: ringFreq
i									ii									iii									iv									v									vi
A			B			C			A			B			C			A			B			C			A			B			C			A			B			C			A			B
Aromatic	Counts	%	Aromatic	Counts	%	Aromatic	Counts	%	Aromatic	Counts	%	Aromatic	Counts	%	Aromatic	Counts	%	Aromatic	Counts	%	Aromatic	Counts	%	Aromatic	Counts	%	Aromatic	Counts	%	Aromatic	Counts	%	Aromatic	Counts	%	Aromatic	Counts	%	Aromatic	Counts	%	Aromatic	Counts	%	Aromatic	Counts	%	Aromatic	Counts
TRP	136	25.046	HIS	702	41.5385	HIS	2161	50.979	HIS	180	79.2952	HIS	1495	82.188	HIS	6617	96.4296	TRP	419	25.8962	TYR	1342	28.1755	TYR	14207	36.7495	HIS	443	52.9271	HIS	894	61.8257	HIS	3713	76.258	HIS	4274	27.5902	HIS	10827	26.2479	HIS	78756	40.0354	G	61	24.898	HIS	124
HIS	131	24.1252	TYR	334	19.7633	TYR	973	22.9535	HEM	14	6.1674	CLA	73	4.01319	IMD	81	1.18041	TYR	397	24.5365	HIS	1081	22.6958	HIS	12323	31.8761	G	55	6.57109	HEM	53	3.66528	G	181	3.7174	PHE	3534	22.8132	PHE	10807	26.1994	TYR	75139	38.1967	U	43	17.551	TRP	76
PHE	104	19.1529	PHE	330	19.5266	TRP	453	10.6865	HEC	9	3.96476	HEM	62	3.40847	A	13	0.189449	HIS	378	23.3622	TRP	1046	21.9609	TRP	6300	16.2963	U	42	5.01792	TYR	44	3.04288	TYR	166	3.40932	TYR	3272	21.1219	TYR	10797	26.1752	TRP	22716	11.5476	HIS	38	15.5102	TYR	51
TYR	86	15.8379	TRP	199	11.7751	PHE	450	10.6157	G	5	2.20264	PDC	24	1.31941	G	9	0.131157	PHE	325	20.0865	PHE	1028	21.583	PHE	3654	9.45187	HEM	39	4.6595	PHE	36	2.48963	C	57	1.17067	TRP	2659	17.1648	TRP	6291	15.2513	PHE	12806	6.50989	A	27	11.0204	A	38
G	22	4.05157	G	17	1.00592	G	71	1.67492	CLA	5	2.20264	SRM	17	0.934579	PBD	9	0.131157	FAD	12	0.741656	NRQ	22	0.461894	GDP	112	0.289713	CLA	26	3.10633	A	36	2.48963	U	54	1.10906	FAD	178	1.14905	NAP	135	0.327281	PLP	343	0.174363	C	18	7.34694	PHE	37
NAD	16	2.94659	A	10	0.591716	U	26	0.613352	A	4	1.76211	PQQ	14	0.769654	DG	5	0.0728651	A	8	0.494438	FAD	21	0.440899	G	99	0.256085	ATP	15	1.79211	G	35	2.42047	PHE	42	0.8626	FMN	129	0.832742	NAD	111	0.269097	GDP	340	0.172838	TRP	12	4.89796	G	25
U	9	1.65746	U	9	0.532544	A	19	0.448219	HEA	2	0.881057	HEC	8	0.439802	ATP	4	0.058292	G	5	0.309023	ADP	14	0.293932	NAP	88	0.227631	HEC	15	1.79211	TRP	26	1.79806	TRP	36	0.739372	NAD	124	0.800465	FAD	90	0.218187	G	249	0.126578	TYR	8	3.26531	C	15
NAI	4	0.736648	C	9	0.532544	C	15	0.353857	SRM	1	0.440529	7MT	7	0.384827	7WJ	4	0.058292	C	5	0.309023	CR8	13	0.272937	NDP	68	0.175897	TYR	12	1.43369	C	22	1.52144	IMD	31	0.636681	NAP	113	0.729456	A	72	0.17455	IMD	231	0.117428	PHE	8	3.26531	U	15
A	4	0.736648	DG	8	0.473373	IMD	11	0.259495	POR	1	0.440529	KC1	6	0.329852	DRP	4	0.058292	PEB	5	0.309023	C	12	0.251942	C2E	62	0.160377	C	11	1.31422	ATP	16	1.1065	A	26	0.533991	G	48	0.309857	CLA	59	0.143034	NAD	220	0.111836	UMP	4	1.63265	DG	14
NAP	3	0.552486	MA7	6	0.35503	NDP	11	0.259495	OT1	1	0.440529	HM6	6	0.329852	UN9	4	0.058292	ATP	4	0.247219	G	11	0.230947	DC	61	0.15779	PBD	9	1.07527	HEC	16	1.1065	ADP	25	0.513452	ATP	41	0.26467	HEM	57	0.138185	GNP	164	0.0833689	DT	3	1.22449	DC	10
MBN	3	0.552486	NAD	4	0.236686	NAP	6	0.141543	OHI	1	0.440529	IKX	6	0.329852	XFJ	3	0.043719	ADP	4	0.247219	GYC	8	0.167961	H4B	55	0.14227	PHE	9	1.07527	U	16	1.1065	ATP	24	0.492914	U	36	0.232393	G	40	0.096972	NAP	133	0.0676102	AZA	2	0.816327	DA	9
IMD	3	0.552486	DT	4	0.236686	NAD	5	0.117952	N8Q	1	0.440529	G	6	0.329852	3PZ	3	0.043719	NRQ	3	0.185414	CRQ	7	0.146966	GTP	52	0.134509	A	7	0.83632	DG	16	1.1065	GTP	23	0.472376	NDP	33	0.213027	IMD	34	0.0824262	DC	117	0.0594766	CFF	2	0.816327	PLP	9
CQ9	2	0.368324	NAP	4	0.236686	AMP	2	0.0471809	MML	1	0.440529	DG	5	0.274876	AHN	3	0.043719	BAB	2	0.123609	PEB	6	0.125971	IMD	43	0.111229	TRP	7	0.83632	CLA	12	0.829876	UDP	22	0.451838	HEM	32	0.206572	NDP	32	0.0775776	LLP	115	0.0584599	FAD	2	0.816327	DT	7
QVS	2	0.368324	DC	4	0.236686	DC	2	0.0471809	IMD	1	0.440529	A	5	0.274876	K0I	3	0.043719	APR	2	0.123609	A	6	0.125971	U	42	0.108642	IMD	7	0.83632	ADP	10	0.691563	MTE	20	0.410762	A	32	0.206572	U	27	0.0654561	U	110	0.0559182	URC	2	0.816327	LLP	6
AWV	1	0.184162	FAD	3	0.177515	B3U	2	0.0471809	4EY	1	0.440529	IMD	5	0.274876	1BN	3	0.043719	DT	2	0.123609	NAI	5	0.104976	CYC	40	0.103469	DG	5	0.597372	ANP	5	0.345781	DC	14	0.287533	NAI	27	0.174295	FMN	24	0.0581832	SAH	104	0.0528681	ORO	2	0.816327	1PK	4
AMP	1	0.184162	6MA	2	0.118343	5AD	2	0.0471809				MBO	4	0.219901	DA	2	0.029146	1JF	2	0.123609	U	5	0.104976	C	38	0.0982954	ADP	3	0.358423	DC	4	0.276625	C2E	13	0.266995	IMD	24	0.154929	ADP	23	0.0557589	GTP	94	0.0477846	PLP	2	0.816327	MA7	3
6UW	1	0.184162	EBP	2	0.118343	7Y1	2	0.0471809				MML	3	0.164926	ED5	2	0.029146	U	2	0.123609	KLA	3	0.0629855	GNP	38	0.0982954	OLW	3	0.358423	MVL	3	0.207469	PTT	11	0.225919	PLP	15	0.0968304	NAI	20	0.048486	FAD	79	0.0401594	GBL	1	0.408163	FAD	3
8R0	1	0.184162	12S	2	0.118343	9RX	2	0.0471809				HEA	3	0.164926	A1Z	2	0.029146	5GP	1	0.0618047	XYG	3	0.0629855	NAD	33	0.0853618	APC	3	0.358423	AMP	3	0.207469	DGT	11	0.225919	C	14	0.0903751	DC	20	0.048486	PMP	77	0.0391427	EDA	1	0.408163	UDP	3
C	1	0.184162	IMD	2	0.118343	ADP	1	0.0235905				DCJ	3	0.164926	LUW	2	0.029146	AWV	1	0.0618047	AMZ	3	0.0629855	PLP	27	0.0698414	AHN	3	0.358423	EZ8	3	0.207469	ANP	8	0.164305	AMP	13	0.0839197	DA	20	0.048486	ADP	71	0.0360926	IMD	1	0.408163	4NC	3
58L	1	0.184162	00S	2	0.118343	ATP	1	0.0235905				4NC	3	0.164926	MD6	2	0.029146	C2E	1	0.0618047	DG	3	0.0629855	DG	23	0.0594946	CHL	3	0.358423	PGD	3	0.207469	BIO	7	0.143767	AMQ	12	0.0774643	SRM	18	0.0436374	DG	70	0.0355843	DG	1	0.408163	AX5	2
58K	1	0.184162	NAI	2	0.118343	ZST	1	0.0235905				3WL	3	0.164926	90V	2	0.029146	BNL	1	0.0618047	CH6	3	0.0629855	A	21	0.0543211	FAD	3	0.358423	APC	3	0.207469	UD1	7	0.143767	HEC	10	0.0645536	NRQ	18	0.0436374	NDP	69	0.0350759	DA	1	0.408163	AMP	2
BTM	1	0.184162	NAJ	1	0.0591716	6O6	1	0.0235905				CHL	2	0.109951	NCA	2	0.029146	BEN	1	0.0618047	IMD	3	0.0629855	ADP	17	0.0439742	1BN	3	0.358423	AD3	3	0.207469	5GP	6	0.123229	COA	9	0.0580983	PQQ	15	0.0363645	A	67	0.0340593	B4P	1	0.408163	1QS	2
FAD	1	0.184162	PUR	1	0.0591716	7H5	1	0.0235905				BCL	2	0.109951	0WS	2	0.029146	21D	1	0.0618047	BNI	3	0.0629855	PEB	15	0.0388008	HLW	2	0.238949	578	3	0.207469	8DG	6	0.123229	ADP	9	0.0580983	DG	15	0.0363645	SAM	65	0.0330426	PRL	1	0.408163	UPG	2
CO0	1	0.184162	SIB	1	0.0591716	5R6	1	0.0235905				9RX	2	0.109951	ED2	2	0.029146	B0V	1	0.0618047	PTR	3	0.0629855	FAD	14	0.0362141	9HL	2	0.238949	PQQ	3	0.207469	PTE	6	0.123229	THP	8	0.0516429	CR8	14	0.0339402	ATP	63	0.0320259	APR	1	0.408163	GDU	2
CV3	1	0.184162	8OA	1	0.0591716	5MC	1	0.0235905				4SX	2	0.109951	5UJ	2	0.029146	24I	1	0.0618047	NAD	2	0.0419903	UDP	14	0.0362141	ISW	2	0.238949	864	3	0.207469	NAP	5	0.10269	CLA	7	0.0451875	SAH	14	0.0339402	CYC	55	0.0279591	UFP	1	0.408163	1LJ	2
DAH	1	0.184162	8EY	1	0.0591716	290	1	0.0235905				1WD	2	0.109951	PHE	2	0.029146	5M8	1	0.0618047	IEY	2	0.0419903	PLG	11	0.0284539	XG4	2	0.238949	MGD	3	0.207469	8GT	5	0.10269	DA	7	0.0451875	U5P	13	0.0315159	C	45	0.0228756	47P	1	0.408163	UDH	2
EDA	1	0.184162	732	1	0.0591716	0WO	1	0.0235905				BLM	2	0.109951	40G	2	0.029146	27X	1	0.0618047	UDP	2	0.0419903	AT2	11	0.0284539	F2A	2	0.238949	DT	3	0.207469	DG	5	0.10269	SHI	7	0.0451875	ATP	12	0.0290916	TPP	37	0.0188088	0G	1	0.408163	RU7	2
FMN	1	0.184162	6MZ	1	0.0591716	AWV	1	0.0235905				VEA	2	0.109951	4HG	2	0.029146	ANP	1	0.0618047	VYA	2	0.0419903	PT1	10	0.0258672	KC1	2	0.238949	DA	3	0.207469	HIC	5	0.10269	TPV	7	0.0451875	DT	12	0.0290916	MTA	35	0.0177921				PIA	2
LDV	1	0.184162	U31	1	0.0591716	DG	1	0.0235905				TYR	2	0.109951	AVJ	1	0.014573	2DZ	1	0.0618047	COA	2	0.0419903	DGT	10	0.0258672	L5Z	2	0.238949	1MK	2	0.138313	UGA	5	0.10269	C2F	7	0.0451875	GDP	12	0.0290916	ADE	35	0.0177921				NAD	2
PCR	1	0.184162	627	1	0.0591716	BYC	1	0.0235905				T03	2	0.109951	2C5	1	0.014573	31B	1	0.0618047	NAP	2	0.0419903	HH2	10	0.0258672	EG8	2	0.238949	Z93	2	0.138313	CTP	4	0.0821524	SAM	7	0.0451875	C	12	0.0290916	AMP	33	0.0167755				LYA	1
THH	1	0.184162	5HC	1	0.0591716	BYZ	1	0.0235905				RU7	2	0.109951	3AT	1	0.014573	919	1	0.0618047	AMP	2	0.0419903	COA	9	0.0232805	MVL	2	0.238949	NAP	2	0.138313	TMP	4	0.0821524	PQQ	7	0.0451875	CRQ	11	0.0266673	MGD	33	0.0167755				7JT	1
58D	1	0.184162	5FC	1	0.0591716	CYC	1	0.0235905				HZT	1	0.0549753	DQJ	1	0.014573	478	1	0.0618047	CYC	2	0.0419903	IMP	9	0.0232805	E2Z	2	0.238949	UPF	2	0.138313	NAD	4	0.0821524	GIM	7	0.0451875	UDP	10	0.024243	DT	32	0.0162671				THA	1
			5AD	1	0.0591716	YTT	1	0.0235905				SNF	1	0.0549753	3FY	1	0.014573	CRK	1	0.0618047	GYS	2	0.0419903	XHP	9	0.0232805	2MU	2	0.238949	H79	2	0.138313	MVL	4	0.0821524	BWD	6	0.0387322	AMP	10	0.024243	C2E	31	0.0157588				AT4	1
			40A	1	0.0591716	FE9	1	0.0235905				OHI	1	0.0549753	42Z	1	0.014573	5VM	1	0.0618047	PIA	2	0.0419903	CTP	8	0.0206938	THP	2	0.238949	APK	2	0.138313	HEM	4	0.0821524	2GE	6	0.0387322	PLP	10	0.024243	ADN	31	0.0157588				TIQ	1
			3DT	1	0.0591716	GTP	1	0.0235905				OOH	1	0.0549753	CRG	1	0.014573	Z84	1	0.0618047	9SZ	2	0.0419903	KMA	8	0.0206938	0KX	2	0.238949	NAD	2	0.138313	HSO	4	0.0821524	CNU	6	0.0387322	OMZ	10	0.024243	GUN	30	0.0152504				A6U	1
			2PV	1	0.0591716	GTZ	1	0.0235905				PD2	1	0.0549753	C	1	0.014573	CYC	1	0.0618047	BAP	1	0.0209952	PMM	8	0.0206938	UTP	2	0.238949	IMD	2	0.138313	UD2	4	0.0821524	AM1	6	0.0387322	NOV	10	0.024243	UDP	29	0.0147421				TX7	1
			URF	1	0.0591716	HSO	1	0.0235905				AVJ	1	0.0549753	BP5	1	0.014573	HIC	1	0.0618047	CRR	1	0.0209952	AR6	8	0.0206938	NAP	2	0.238949	SB7	2	0.138313	JSD	4	0.0821524	UBP	6	0.0387322	MVL	10	0.024243	2GP	27	0.0137254				7H7	1
			CTE	1	0.0591716	IMP	1	0.0235905				AIV	1	0.0549753	BNE	1	0.014573	UDP	1	0.0618047	C2E	1	0.0209952	NMN	8	0.0206938	7F5	2	0.238949	B30	2	0.138313	PRH	4	0.0821524	IWD	6	0.0387322	PEB	9	0.0218187	5GP	26	0.013217				CR8	1
			PIY	1	0.0591716	IOS	1	0.0235905				S77	1	0.0549753	B7Z	1	0.014573	ST5	1	0.0618047	CFY	1	0.0209952	KAA	7	0.018107	6J0	2	0.238949	B9Z	2	0.138313	BLO	4	0.0821524	HIC	5	0.0322768	GYC	9	0.0218187	NAI	25	0.0127087				5SQ	1
			PE0	1	0.0591716	LLP	1	0.0235905				829	1	0.0549753	5U8	1	0.014573	SHN	1	0.0618047	CKL	1	0.0209952	PMP	7	0.018107	1JF	2	0.238949	4NC	2	0.138313	HWU	3	0.0616143	MHF	5	0.0322768	HEC	9	0.0218187	ANP	24	0.0122003				5CM	1
			XFN	1	0.0591716	ML4	1	0.0235905				752	1	0.0549753	7TP	1	0.014573	RAI	1	0.0618047	CR7	1	0.0209952	PLS	7	0.018107	RKL	2	0.238949	3PZ	2	0.138313	XFJ	3	0.0616143	CTP	5	0.0322768	UDH	9	0.0218187	GSP	24	0.0122003				TZ2	1
			M4R	1	0.0591716	PDC	1	0.0235905				HKL	1	0.0549753	7TR	1	0.014573	NAP	1	0.0618047	AWV	1	0.0209952	DT	7	0.018107	4E8	2	0.238949	VEA	2	0.138313	V1D	3	0.0616143	IRN	5	0.0322768	LLP	8	0.0193944	GCP	23	0.011692				3FG	1
			IMP	1	0.0591716	SS0	1	0.0235905				6PC	1	0.0549753	5UL	1	0.014573	LDV	1	0.0618047	CRK	1	0.0209952	SAH	6	0.0155203	2GP	1	0.119474	ADE	1	0.0691563	MGD	3	0.0616143	BMQ	5	0.0322768	BE2	7	0.0169701	MTX	22	0.0111836				38B	1
			NDP	1	0.0591716	065	1	0.0235905				5LD	1	0.0549753	APC	1	0.014573	L18	1	0.0618047	CRO	1	0.0209952	KRS	6	0.0155203	1RZ	1	0.119474	ADJ	1	0.0691563	MSS	3	0.0616143	PEB	5	0.0322768	BEN	7	0.0169701	MHS	22	0.0111836				UD2	1
			IGA	1	0.0591716							4P9	1	0.0549753	5UO	1	0.014573	KMA	1	0.0618047	B37	1	0.0209952	8EY	6	0.0155203	CRO	1	0.119474	D1Y	1	0.0691563	NMN	3	0.0616143	BMP	5	0.0322768	GDU	7	0.0169701	PEB	21	0.0106753				COA	1
			HYN	1	0.0591716							4IR	1	0.0549753	6E7	1	0.014573	KLY	1	0.0618047	ZNP	1	0.0209952	DCP	6	0.0155203	9DJ	1	0.119474	CRO	1	0.0691563	DCF	3	0.0616143	A3D	5	0.0322768	AMZ	7	0.0169701	PLG	21	0.0106753				CRQ	1
			HJX	1	0.0591716							U12	1	0.0549753	6EB	1	0.014573	IMD	1	0.0618047	AWO	1	0.0209952	OUA	6	0.0155203	DA	1	0.119474	ACP	1	0.0691563	6O6	3	0.0616143	8EY	5	0.0322768	00S	7	0.0169701	BEN	18	0.00915025				MD3	1
			GSB	1	0.0591716							3TR	1	0.0549753	6EP	1	0.014573	H3V	1	0.0618047	4JZ	1	0.0209952	QJ7	5	0.0129336	DC	1	0.119474	C0W	1	0.0691563	GDP	3	0.0616143	919	5	0.0322768	NE8	7	0.0169701	TOP	18	0.00915025				FX7	1
			OMZ	1	0.0591716							U13	1	0.0549753	A1H	1	0.014573	FLF	1	0.0618047	0R6	1	0.0209952	ATP	5	0.0129336	2KA	1	0.119474	A4P	1	0.0691563	3L4	3	0.0616143	FWD	5	0.0322768	88N	6	0.0145458	DA	17	0.0086419				IGA	1
			O1H	1	0.0591716							NTM	1	0.0549753	720	1	0.014573	H2Y	1	0.0618047	0YH	1	0.0209952	KLY	5	0.0129336	DGT	1	0.119474	BIO	1	0.0691563	TV7	3	0.0616143	AT1	5	0.0322768	MTX	6	0.0145458	HMH	17	0.0086419				MYC	1
			FU2	1	0.0591716							CLN	1	0.0549753	7JK	1	0.014573	H2J	1	0.0618047	13A	1	0.0209952	GSP	5	0.0129336	DRB	1	0.119474	AIV	1	0.0691563	FZQ	3	0.0616143	RX8	4	0.0258214	I46	6	0.0145458	FMN	17	0.0086419				GYS	1
			FOT	1	0.0591716							COH	1	0.0549753	7TM	1	0.014573	H1Y	1	0.0618047	147	1	0.0209952	M16	5	0.0129336	1FZ	1	0.119474	BDL	1	0.0691563	V1P	3	0.0616143	BLA	4	0.0258214	PL2	6	0.0145458	FOL	16	0.00813355				MZV	1
			O1Q	1	0.0591716							GDP	1	0.0549753	ED1	1	0.014573	H1G	1	0.0618047	1A2	1	0.0209952	DPM	5	0.0129336	DRU	1	0.119474	C0V	1	0.0691563	AHN	3	0.0616143	QUK	4	0.0258214	GTA	6	0.0145458	THG	16	0.00813355				FY4	1
			EDA	1	0.0591716							I96	1	0.0549753	8Q8	1	0.014573	H17	1	0.0618047	1F1	1	0.0209952	5GP	5	0.0129336	1RY	1	0.119474	BY6	1	0.0691563	V1S	3	0.0616143	C09	4	0.0258214	SAL	5	0.0121215	CB3	14	0.00711686				FY1	1
			O5W	1	0.0591716							HIC	1	0.0549753	7TO	1	0.014573	H0M	1	0.0618047	21D	1	0.0209952	MHF	5	0.0129336	3ES	1	0.119474	BWU	1	0.0691563	SV2	3	0.0616143	TZG	4	0.0258214	O31	5	0.0121215	MGT	14	0.00711686				FQW	1
			XHP	1	0.0591716							HHV	1	0.0549753	8XQ	1	0.014573	H0G	1	0.0618047	2GP	1	0.0209952	DA	5	0.0129336	BSV	1	0.119474	BVS	1	0.0691563	L4D	2	0.0410762	CQG	4	0.0258214	C2E	5	0.0121215	URC	14	0.00711686				PSU	1
												KU7	1	0.0549753	XFK	1	0.014573	GYC	1	0.0618047	3EL	1	0.0209952	9OJ	5	0.0129336	BQ4	1	0.119474	BTJ	1	0.0691563	GAV	2	0.0410762	TSV	4	0.0258214	SAM	4	0.0096972	COA	13	0.00660851				NAI	1
												LXA	1	0.0549753	ED4	1	0.014573	GTP	1	0.0618047	3FG	1	0.0209952	OSD	5	0.0129336	BES	1	0.119474	BR3	1	0.0691563	B12	2	0.0410762	U5P	4	0.0258214	GYS	4	0.0096972	GMP	13	0.00660851				EZR	1
												HEB	1	0.0549753	S48	1	0.014573	UTP	1	0.0618047	3Z2	1	0.0209952	KLD	5	0.0129336	BAB	1	0.119474	9NW	1	0.0691563	MCF	2	0.0410762	746	4	0.0258214	RP4	4	0.0096972	PGU	12	0.00610016				EDA	1
												U14	1	0.0549753	PZ3	1	0.014573	04A	1	0.0618047	4XD	1	0.0209952	HBI	5	0.0129336	AUY	1	0.119474	BP5	1	0.0691563	MBY	2	0.0410762	AZA	4	0.0258214	PIA	4	0.0096972	SFG	12	0.00610016				NAP	1
												GYA	1	0.0549753	QC2	1	0.014573				APC	1	0.0209952	W68	5	0.0129336	5M2	1	0.119474	BAB	1	0.0691563	MBO	2	0.0410762	PTR	3	0.0193661	TD2	4	0.0096972	NMN	12	0.00610016				DHY	1
												GBF	1	0.0549753	QFY	1	0.014573				4XJ	1	0.0209952	KL4	5	0.0129336	6ED	1	0.119474	ZSP	1	0.0691563	FAD	2	0.0410762	SAH	3	0.0193661	RIS	4	0.0096972	DHF	11	0.00559182				NRQ	1
												D0X	1	0.0549753	QG4	1	0.014573				4XK	1	0.0209952	OUS	5	0.0129336	6EN	1	0.119474	9FJ	1	0.0691563	L69	2	0.0410762	SAL	3	0.0193661	EQU	4	0.0096972	HPA	11	0.00559182				VYA	1
												MNH	1	0.0549753	QKQ	1	0.014573				5SQ	1	0.0209952	NAI	4	0.0103469	AR6	1	0.119474	1OU	1	0.0691563	HHV	2	0.0410762	NTZ	3	0.0193661	KNV	4	0.0096972	PH2	11	0.00559182
												FO2	1	0.0549753	R20	1	0.014573				691	1	0.0209952	OUP	4	0.0103469	ANP	1	0.119474	37B	1	0.0691563	BEZ	2	0.0410762	NRQ	3	0.0193661	MGD	4	0.0096972	FMC	11	0.00559182
												ENZ	1	0.0549753	RHU	1	0.014573				7S9	1	0.0209952	FZQ	4	0.0103469	AIV	1	0.119474	32Q	1	0.0691563	HH2	2	0.0410762	DG	3	0.0193661	5FU	4	0.0096972	PXG	11	0.00559182
												DHY	1	0.0549753	S2I	1	0.014573				7ZC	1	0.0209952	6MB	4	0.0103469	7MT	1	0.119474	2SK	1	0.0691563	FQT	2	0.0410762	DNQ	3	0.0193661	PDC	4	0.0096972	PLR	11	0.00559182
												DHE	1	0.0549753	S77	1	0.014573				919	1	0.0209952	R6W	4	0.0103469	DT	1	0.119474	2SA	1	0.0691563	JMQ	2	0.0410762	DT	3	0.0193661	PTR	4	0.0096972	H4B	11	0.00559182
												MY7	1	0.0549753	ED7	1	0.014573				DYG	1	0.0209952	2SN	4	0.0103469	8DG	1	0.119474	2NI	1	0.0691563	IMU	2	0.0410762	M4D	3	0.0193661	MBO	4	0.0096972	IMP	10	0.00508347
												NNO	1	0.0549753	T03	1	0.014573				ACO	1	0.0209952	KLA	4	0.0103469	YX0	1	0.119474	2K8	1	0.0691563	IMQ	2	0.0410762	LLP	3	0.0193661	KL4	4	0.0096972	MVL	10	0.00508347
												DAH	1	0.0549753	T07	1	0.014573				AGS	1	0.0209952	NSQ	4	0.0103469	GXG	1	0.119474	2C5	1	0.0691563	IMP	2	0.0410762	OLW	3	0.0193661	COA	4	0.0096972	PLS	10	0.00508347
												1CW	1	0.0549753	TRP	1	0.014573				ANP	1	0.0209952	HW1	4	0.0103469	DZ4	1	0.119474	2B8	1	0.0691563	CXA	2	0.0410762	FDA	3	0.0193661	88S	4	0.0096972	UD1	9	0.00457512
															TYR	1	0.014573				DG7	1	0.0209952	PRH	4	0.0103469	MSR	1	0.119474	1OT	1	0.0691563	DT	2	0.0410762	ZZD	3	0.0193661	DND	4	0.0096972	AR6	9	0.00457512
															U	1	0.014573				H3A	1	0.0209952	OAD	4	0.0103469	NAD	1	0.119474	9DJ	1	0.0691563	BES	2	0.0410762	SH3	3	0.0193661	KLA	4	0.0096972	PRF	9	0.00457512
															U19	1	0.014573				EJW	1	0.0209952	OSG	4	0.0103469	NTM	1	0.119474	1OS	1	0.0691563	GY6	2	0.0410762	8FD	3	0.0193661	UNL	4	0.0096972	0JO	9	0.00457512
															U8K	1	0.014573				NRP	1	0.0209952	PTR	4	0.0103469	NVI	1	0.119474	1FZ	1	0.0691563	CBP	2	0.0410762	CE2	3	0.0193661	DHF	4	0.0096972	M7G	9	0.00457512
															XAN	1	0.014573				LVD	1	0.0209952	Q1T	4	0.0103469	O1N	1	0.119474	121	1	0.0691563	ZSP	2	0.0410762	CPW	3	0.0193661	VYA	4	0.0096972	TDP	9	0.00457512
															PDC	1	0.014573				M16	1	0.0209952	PTT	4	0.0103469	PMB	1	0.119474	0TN	1	0.0691563	S48	2	0.0410762	BN1	3	0.0193661	RDL	3	0.0072729	PHB	9	0.00457512
															PB9	1	0.014573				MD1	1	0.0209952	Q16	4	0.0103469	QHL	1	0.119474	0KX	1	0.0691563	NTM	2	0.0410762	SUE	3	0.0193661	EZ8	3	0.0072729	MTM	9	0.00457512
															P60	1	0.014573				ML6	1	0.0209952	Q14	4	0.0103469	QMS	1	0.119474	0A1	1	0.0691563	4AA	2	0.0410762	XEB	3	0.0193661	B43	3	0.0072729	URA	9	0.00457512
															NVI	1	0.014573				MVL	1	0.0209952	OS7	4	0.0103469	R4A	1	0.119474	099	1	0.0691563	TDJ	2	0.0410762	CG8	3	0.0193661	KC1	3	0.0072729	MD1	8	0.00406678
															ENZ	1	0.014573				MZN	1	0.0209952	OUG	4	0.0103469	RFA	1	0.119474	043	1	0.0691563	U5P	2	0.0410762	2R9	3	0.0193661	7MG	3	0.0072729	CP6	8	0.00406678
															F95	1	0.014573				MZQ	1	0.0209952	KL7	4	0.0103469	RKM	1	0.119474	4BR	1	0.0691563	2K8	2	0.0410762	5GP	3	0.0193661	M0N	3	0.0072729	Q21	8	0.00406678
															FOW	1	0.014573				NDP	1	0.0209952	H2B	4	0.0103469	RU8	1	0.119474	4EY	1	0.0691563	URC	2	0.0410762	L5Z	2	0.0129107	CRO	3	0.0072729	APR	8	0.00406678
															FQB	1	0.014573				NNO	1	0.0209952	OU1	4	0.0103469	S8F	1	0.119474	4QP	1	0.0691563	VAO	2	0.0410762	4W0	2	0.0129107	XYG	3	0.0072729	CTP	8	0.00406678
															FQH	1	0.014573				NOV	1	0.0209952	PH2	4	0.0103469	SAM	1	0.119474	4TL	1	0.0691563	5MC	2	0.0410762	L47	2	0.0129107	PGD	3	0.0072729	OUA	8	0.00406678
															H6A	1	0.014573				OFM	1	0.0209952	8FD	4	0.0103469	THH	1	0.119474	8OS	1	0.0691563	NX6	2	0.0410762	KLD	2	0.0129107	2L5	3	0.0072729	NCA	8	0.00406678
															HIC	1	0.014573				LHM	1	0.0209952	3FG	4	0.0103469	TLF	1	0.119474	8GT	1	0.0691563	141	2	0.0410762	4ZK	2	0.0129107	4NC	3	0.0072729	PBD	8	0.00406678
															HPA	1	0.014573				OIM	1	0.0209952	Q13	4	0.0103469	TPT	1	0.119474	829	1	0.0691563	NEP	2	0.0410762	N6Z	2	0.0129107	GG5	3	0.0072729	5CM	8	0.00406678
															I96	1	0.014573				PNN	1	0.0209952	KMS	4	0.0103469	TPU	1	0.119474	7WJ	1	0.0691563	RRB	2	0.0410762	5BU	2	0.0129107	7MT	3	0.0072729	GNH	7	0.00355843
															JJJ	1	0.014573				SQP	1	0.0209952	1EV	4	0.0103469	VER	1	0.119474	7TR	1	0.0691563	0N8	2	0.0410762	LUM	2	0.0129107	ANP	3	0.0072729	3L1	7	0.00355843
															JJK	1	0.014573				ST1	1	0.0209952	XEB	4	0.0103469	X89	1	0.119474	D66	1	0.0691563	3D1	1	0.0205381	IDQ	2	0.0129107	AP5	3	0.0072729	F89	7	0.00355843
															KU1	1	0.014573				ST4	1	0.0209952	CRQ	4	0.0103469	N9W	1	0.119474	7TQ	1	0.0691563	3EF	1	0.0205381	IDE	2	0.0129107	APC	3	0.0072729	4CO	7	0.00355843
															LXA	1	0.014573				TMP	1	0.0209952	DU	4	0.0103469	MES	1	0.119474	7TP	1	0.0691563	AGV	1	0.0205381	HLW	2	0.0129107	XMP	3	0.0072729	TDI	7	0.00355843
															N1G	1	0.014573				TYD	1	0.0209952	9HJ	4	0.0103469	ENG	1	0.119474	7ML	1	0.0691563	B4N	1	0.0205381	HJ8	2	0.0129107	FDA	3	0.0072729	FTR	7	0.00355843
															NAD	1	0.014573				TYS	1	0.0209952	E67	4	0.0103469	M3Q	1	0.119474	7JT	1	0.0691563	3HA	1	0.0205381	5IU	2	0.0129107	CNI	3	0.0072729	C2F	7	0.00355843
															NH7	1	0.014573				TYZ	1	0.0209952	9OG	4	0.0103469	FEC	1	0.119474	7F5	1	0.0691563	2GP	1	0.0205381	4E8	2	0.0129107	FE9	3	0.0072729	CRO	7	0.00355843
															NL5	1	0.014573				XMP	1	0.0209952	BYV	4	0.0103469	GKW	1	0.119474	727	1	0.0691563	30O	1	0.0205381	M85	2	0.0129107	CYC	3	0.0072729	W68	7	0.00355843
															FO2	1	0.014573				LJM	1	0.0209952	EXI	4	0.0103469	GTZ	1	0.119474	6JT	1	0.0691563	2KA	1	0.0205381	4BT	2	0.0129107	AX4	3	0.0072729	GTG	6	0.00305008
																					LH7	1	0.0209952	KMM	4	0.0103469	GVR	1	0.119474	5XT	1	0.0691563	AMP	1	0.0205381	M4R	2	0.0129107	OSG	3	0.0072729	PGD	6	0.00305008
																					F0Z	1	0.0209952	M48	4	0.0103469	GXD	1	0.119474	5ER	1	0.0691563	AS	1	0.0205381	M94	2	0.0129107	V1D	3	0.0072729	OS6	6	0.00305008
																					H5G	1	0.0209952	1EW	3	0.00776016	GZV	1	0.119474	4Z1	1	0.0691563	APC	1	0.0205381	MBL	2	0.0129107	B96	3	0.0072729	KMA	6	0.00305008
																					GD9	1	0.0209952	1ET	3	0.00776016	H61	1	0.119474	4YZ	1	0.0691563	B4P	1	0.0205381	46P	2	0.0129107	073	3	0.0072729	U2G	6	0.00305008
																					GTP	1	0.0209952	3GP	3	0.00776016	H79	1	0.119474	D5M	1	0.0691563	33Z	1	0.0205381	3F7	2	0.0129107	E89	3	0.0072729	BZ3	6	0.00305008
																					H0P	1	0.0209952	AMP	3	0.00776016	HB1	1	0.119474	DZ4	1	0.0691563	2BA	1	0.0205381	3BT	2	0.0129107	UD2	3	0.0072729	8EY	6	0.00305008
																					H1J	1	0.0209952	BYJ	3	0.00776016	HEJ	1	0.119474	D7A	1	0.0691563	6SG	1	0.0205381	MKR	2	0.0129107	5GP	3	0.0072729	P00	6	0.00305008
																					H2D	1	0.0209952	ANP	3	0.00776016	HFD	1	0.119474	PP9	1	0.0691563	BAH	1	0.0205381	MTA	2	0.0129107	PYC	3	0.0072729	D7K	6	0.00305008
																					H47	1	0.0209952	W82	3	0.00776016	HM7	1	0.119474	RML	1	0.0691563	C2I	1	0.0205381	MVW	2	0.0129107	9SZ	3	0.0072729	M16	6	0.00305008
																					H4B	1	0.0209952	M4R	3	0.00776016	HM9	1	0.119474	RFA	1	0.0691563	0C	1	0.0205381	1HA	2	0.0129107	5AD	3	0.0072729	HSM	6	0.00305008
																					H4G	1	0.0209952	N3P	3	0.00776016	I93	1	0.119474	RBN	1	0.0691563	0LX	1	0.0205381	1BV	2	0.0129107	PLS	3	0.0072729	MGP	6	0.00305008
																					H54	1	0.0209952	N47	3	0.00776016	IKY	1	0.119474	R6A	1	0.0691563	CBQ	1	0.0205381	11N	2	0.0129107	A3D	3	0.0072729	ACP	6	0.00305008
																					H5D	1	0.0209952	S5D	3	0.00776016	JM1	1	0.119474	R5A	1	0.0691563	0R7	1	0.0205381	N2T	2	0.0129107	CQG	3	0.0072729	IK2	6	0.00305008
																					HIC	1	0.0209952	OUM	3	0.00776016	K0I	1	0.119474	R47	1	0.0691563	0U	1	0.0205381	N4T	2	0.0129107	TYS	3	0.0072729	BIG	6	0.00305008
																					LFP	1	0.0209952	KMV	3	0.00776016	K9L	1	0.119474	PZ3	1	0.0691563	C7P	1	0.0205381	5RS	2	0.0129107	5KT	3	0.0072729	D16	6	0.00305008
																					IA2	1	0.0209952	OSJ	3	0.00776016	KDZ	1	0.119474	PIM	1	0.0691563	0ZD	1	0.0205381	7F5	2	0.0129107	ACP	3	0.0072729	DU	6	0.00305008
																					IZ1	1	0.0209952	JHT	3	0.00776016	040	1	0.119474	RUI	1	0.0691563	1HN	1	0.0205381	6J0	2	0.0129107	9Y7	3	0.0072729	XEB	5	0.00254174
																					JJ5	1	0.0209952	YOF	3	0.00776016				PH0	1	0.0691563	283	1	0.0205381	EMQ	2	0.0129107	RBF	3	0.0072729	OS7	5	0.00254174
																					KL4	1	0.0209952	NCA	3	0.00776016				OK3	1	0.0691563	BZS	1	0.0205381	CHL	2	0.0129107	74W	2	0.0048486	KLY	5	0.00254174
																					KXV	1	0.0209952	B55	3	0.00776016				OJ4	1	0.0691563	BPX	1	0.0205381	CWD	2	0.0129107	OUS	2	0.0048486	KLD	5	0.00254174
																					KY4	1	0.0209952	B57	3	0.00776016				NU7	1	0.0691563	1MK	1	0.0205381	CYC	2	0.0129107	AX5	2	0.0048486	QJ7	5	0.00254174
																					KZ4	1	0.0209952	XFN	3	0.00776016				NTM	1	0.0691563	1MZ	1	0.0205381	D1W	2	0.0129107	IBC	2	0.0048486	PQ0	5	0.00254174
																					KZ7	1	0.0209952	BEZ	3	0.00776016				NK5	1	0.0691563	AG4	1	0.0205381	D1Z	2	0.0129107	OUP	2	0.0048486	U5P	5	0.00254174
																					KZG	1	0.0209952	W67	3	0.00776016				NAI	1	0.0691563	25P	1	0.0205381	D80	2	0.0129107	GQ7	2	0.0048486	EXI	5	0.00254174
																					KZV	1	0.0209952	XFK	3	0.00776016				RUC	1	0.0691563	27Y	1	0.0205381	CFF	2	0.0129107	600	2	0.0048486	CGP	5	0.00254174
																					0R5	1	0.0209952	OU4	3	0.00776016				S77	1	0.0691563	BGW	1	0.0205381	DBV	2	0.0129107	B60	2	0.0048486	OSD	5	0.00254174
																								OU7	3	0.00776016				DBH	1	0.0691563	3L5	1	0.0205381	DC	2	0.0129107	PRL	2	0.0048486	9OG	5	0.00254174
																								XFJ	3	0.00776016				TWM	1	0.0691563	ADE	1	0.0205381	CDP	2	0.0129107	OZJ	2	0.0048486	PDG	5	0.00254174
																								KN4	3	0.00776016				Z96	1	0.0691563	3HB	1	0.0205381	C8O	2	0.0129107	3FG	2	0.0048486	H4M	5	0.00254174
																								OUJ	3	0.00776016				YIE	1	0.0691563	8CY	1	0.0205381	C0G	2	0.0129107	LIZ	2	0.0048486	OUS	5	0.00254174
																								W69	3	0.00776016				XI7	1	0.0691563	7WH	1	0.0205381	E2Z	2	0.0129107	G83	2	0.0048486	TYE	5	0.00254174
																								S71	3	0.00776016				XG4	1	0.0691563	51H	1	0.0205381	EG8	2	0.0129107	G84	2	0.0048486	PSZ	5	0.00254174
																								KL1	3	0.00776016				WNN	1	0.0691563	56D	1	0.0205381	ANP	2	0.0129107	OU4	2	0.0048486	1PS	5	0.00254174
																								TUE	3	0.00776016				WMM	1	0.0691563	7MT	1	0.0205381	7B2	2	0.0129107	W7E	2	0.0048486	PTR	5	0.00254174
																								Q15	3	0.00776016				TWV	1	0.0691563	7ML	1	0.0205381	AG7	2	0.0129107	62Y	2	0.0048486	1Q6	5	0.00254174
																								9M9	3	0.00776016				TTP	1	0.0691563	7MK	1	0.0205381	FQX	2	0.0129107	IEY	2	0.0048486	TPW	5	0.00254174
																								DCT	3	0.00776016				S8F	1	0.0691563	7MF	1	0.0205381	AEZ	2	0.0129107	88W	2	0.0048486	YGP	5	0.00254174
																								PLR	3	0.00776016				TQI	1	0.0691563	7DV	1	0.0205381	ADE	2	0.0129107	CTE	2	0.0048486	HW1	5	0.00254174
																								2GP	3	0.00776016				TPU	1	0.0691563	7D6	1	0.0205381	G7X	2	0.0129107	79B	2	0.0048486	IGP	5	0.00254174
																								8J4	3	0.00776016				TPT	1	0.0691563	5YQ	1	0.0205381	GDP	2	0.0129107	GDN	2	0.0048486	BLA	5	0.00254174
																								QJ2	3	0.00776016				TBL	1	0.0691563	77S	1	0.0205381	9M9	2	0.0129107	CTP	2	0.0048486	KMM	5	0.00254174
																								QJ8	3	0.00776016				SYN	1	0.0691563	61M	1	0.0205381	GTP	2	0.0129107	JQT	2	0.0048486	MMV	5	0.00254174
																								E72	3	0.00776016				SK3	1	0.0691563	CFE	1	0.0205381	9HL	2	0.0129107	PMS	2	0.0048486	Q14	5	0.00254174
																								GCP	3	0.00776016				SAM	1	0.0691563	76S	1	0.0205381	GYC	2	0.0129107	G82	2	0.0048486	S4M	5	0.00254174
																								4V4	3	0.00776016				N9W	1	0.0691563	61O	1	0.0205381	GYZ	2	0.0129107	CRK	2	0.0048486	3GP	5	0.00254174
																								KM7	3	0.00776016				MBY	1	0.0691563	76B	1	0.0205381	HB2	2	0.0129107	AX3	2	0.0048486	P61	5	0.00254174
																								9CA	3	0.00776016				MBO	1	0.0691563	4X2	1	0.0205381	8EV	2	0.0129107	XFN	2	0.0048486	BIO	5	0.00254174
																								8VJ	3	0.00776016				E68	1	0.0691563	4PQ	1	0.0205381	CRO	2	0.0129107	AX2	2	0.0048486	Q1T	5	0.00254174
																								FMN	3	0.00776016				FIN	1	0.0691563	8HC	1	0.0205381	N5T	2	0.0129107	9K3	2	0.0048486	NEA	5	0.00254174
																								DCF	3	0.00776016				FF2	1	0.0691563	9L3	1	0.0205381	GKM	2	0.0129107	NHV	2	0.0048486	MDR	5	0.00254174
																								9L9	3	0.00776016				FEM	1	0.0691563	6Z1	1	0.0205381	THH	2	0.0129107	7M3	2	0.0048486	ZMA	5	0.00254174
																								PMT	3	0.00776016				ENZ	1	0.0691563	3L6	1	0.0205381	ZT2	2	0.0129107	ADE	2	0.0048486	KMS	5	0.00254174
																								UD1	3	0.00776016				ENY	1	0.0691563	3L7	1	0.0205381	PMT	2	0.0129107	N9N	2	0.0048486	SFC	5	0.00254174
																								M94	3	0.00776016				ELJ	1	0.0691563	ACP	1	0.0205381	URC	2	0.0129107	M2N	2	0.0048486	9P7	5	0.00254174
																								1Q6	3	0.00776016				EEK	1	0.0691563	3NF	1	0.0205381	Q10	2	0.0129107	HA7	2	0.0048486	P9P	5	0.00254174
																								M85	3	0.00776016				E37	1	0.0691563	9OT	1	0.0205381	QED	2	0.0129107	ACO	2	0.0048486	OS5	5	0.00254174
																								CR2	3	0.00776016				LZ0	1	0.0691563	9OB	1	0.0205381	UP6	2	0.0129107	M4V	2	0.0048486	DCP	5	0.00254174
																								PTE	3	0.00776016				ZNP	1	0.0691563	3QF	1	0.0205381	UM3	2	0.0129107	MZV	2	0.0048486	DCZ	5	0.00254174
																								W64	3	0.00776016				DVW	1	0.0691563	8UX	1	0.0205381	UDP	2	0.0129107	5AP	2	0.0048486	PPG	5	0.00254174
																								CNA	3	0.00776016				DPS	1	0.0691563	3QG	1	0.0205381	UB1	2	0.0129107	MY7	2	0.0048486	8L4	4	0.00203339
																								ACO	3	0.00776016				DHY	1	0.0691563	3TV	1	0.0205381	S14	2	0.0129107	DCJ	2	0.0048486	NEZ	4	0.00203339
																								8EV	3	0.00776016				DEO	1	0.0691563	44V	1	0.0205381	O31	2	0.0129107	DCB	2	0.0048486	AX7	4	0.00203339
																								71S	2	0.00517344				DCT	1	0.0691563	4BQ	1	0.0205381	UMA	2	0.0129107	YOF	2	0.0048486	P64	4	0.00203339
																								KMJ	2	0.00517344				DCJ	1	0.0691563	90J	1	0.0205381	ZX6	2	0.0129107	04M	2	0.0048486	F0G	4	0.00203339
																								JRS	2	0.00517344				FTH	1	0.0691563	4BW	1	0.0205381	NFA	2	0.0129107	A09	2	0.0048486	GEO	4	0.00203339
																								JI4	2	0.00517344				GNP	1	0.0691563	4MZ	1	0.0205381	N7H	2	0.0129107	Z82	2	0.0048486	PPE	4	0.00203339
																								JJ5	2	0.00517344				GQW	1	0.0691563	CBV	1	0.0205381	TD2	2	0.0129107	HIC	2	0.0048486	EZZ	4	0.00203339
																								KZM	2	0.00517344				GZ8	1	0.0691563	GIM	1	0.0205381	TMP	2	0.0129107	D5M	2	0.0048486	OSG	4	0.00203339
																								680	2	0.00517344				LUW	1	0.0691563	CL6	1	0.0205381	TUE	2	0.0129107	M16	2	0.0048486	RW2	4	0.00203339
																								KND	2	0.00517344				LKS	1	0.0691563	RX3	1	0.0205381	SU3	2	0.0129107	YGL	2	0.0048486	5PA	4	0.00203339
																								KPJ	2	0.00517344				LA3	1	0.0691563	RMD	1	0.0205381	BTG	1	0.00645536	NPO	2	0.0048486	BEZ	4	0.00203339
																								KNV	2	0.00517344				K3U	1	0.0691563	R07	1	0.0205381	9H7	1	0.00645536	OLW	2	0.0048486	PP3	4	0.00203339
																								6FV	2	0.00517344				J4V	1	0.0691563	QC2	1	0.0205381	8VJ	1	0.00645536	OSD	2	0.0048486	3FG	4	0.00203339
																								JSR	2	0.00517344				J4S	1	0.0691563	QC1	1	0.0205381	VV7	1	0.00645536	OS7	2	0.0048486	3D1	4	0.00203339
																								JRR	2	0.00517344				J2D	1	0.0691563	PYI	1	0.0205381	946	1	0.00645536	OQN	2	0.0048486	GIM	4	0.00203339
																								KMD	2	0.00517344				J1V	1	0.0691563	PPY	1	0.0205381	9AJ	1	0.00645536	GTG	2	0.0048486	8FD	4	0.00203339
																								JSS	2	0.00517344				J0Y	1	0.0691563	PMM	1	0.0205381	9DJ	1	0.00645536	4BM	2	0.0048486	OUM	4	0.00203339
																								JI5	2	0.00517344				ISW	1	0.0691563	PLP	1	0.0205381	9FZ	1	0.00645536	LWD	2	0.0048486	LYA	4	0.00203339
																								5DK	2	0.00517344				IKX	1	0.0691563	PIW	1	0.0205381	9H4	1	0.00645536	XEB	2	0.0048486	BYV	4	0.00203339
																								JI3	2	0.00517344				I92	1	0.0691563	PIM	1	0.0205381	UTX	1	0.00645536	88V	2	0.0048486	NEP	4	0.00203339
																								AP4	2	0.00517344				HM6	1	0.0691563	PHN	1	0.0205381	V1G	1	0.00645536	LWW	2	0.0048486	LG3	4	0.00203339
																								A11	2	0.00517344				HDX	1	0.0691563	PHB	1	0.0205381	8KS	1	0.00645536	AJ1	2	0.0048486	FFO	4	0.00203339
																								A2R	2	0.00517344				H6M	1	0.0691563	PFD	1	0.0205381	9O9	1	0.00645536	CQA	2	0.0048486	OUP	4	0.00203339
																								CS8	2	0.00517344				01B	1	0.0691563	PDC	1	0.0205381	9P1	1	0.00645536	AOB	2	0.0048486	JSD	4	0.00203339
																								CP3	2	0.00517344							PD8	1	0.0205381	9PO	1	0.00645536	4OL	2	0.0048486	OU1	4	0.00203339
																								CKL	2	0.00517344							PBD	1	0.0205381	9YA	1	0.00645536	4P9	2	0.0048486	BZI	4	0.00203339
																								ADN	2	0.00517344							NY2	1	0.0205381	A22	1	0.00645536	4SX	2	0.0048486	GDE	4	0.00203339
																								C5P	2	0.00517344							NPO	1	0.0205381	A2D	1	0.00645536	NWJ	2	0.0048486	TBN	4	0.00203339
																								BY7	2	0.00517344							NOS	1	0.0205381	A2H	1	0.00645536	ALN	2	0.0048486	TCA	4	0.00203339
																								BLA	2	0.00517344							NGH	1	0.0205381	8KV	1	0.00645536	4V4	2	0.0048486	2GX	4	0.00203339
																								BHS	2	0.00517344							NE5	1	0.0205381	8JO	1	0.00645536	BAM	2	0.0048486	OU4	4	0.00203339
																								F0K	2	0.00517344							RTB	1	0.0205381	8JP	1	0.00645536	UMP	2	0.0048486	8J4	4	0.00203339
																								AP6	2	0.00517344							S2X	1	0.0205381	7G7	1	0.00645536	CPW	2	0.0048486	R6W	4	0.00203339
																								B76	2	0.00517344							NAE	1	0.0205381	6UW	1	0.00645536	DYG	2	0.0048486	NOS	4	0.00203339
																								B62	2	0.00517344							S77	1	0.0205381	6XL	1	0.00645536	TPM	2	0.0048486	AGS	4	0.00203339
																								B61	2	0.00517344							YMP	1	0.0205381	6Z1	1	0.00645536	JA2	2	0.0048486	4V4	4	0.00203339
																								B60	2	0.00517344							Y6W	1	0.0205381	X2O	1	0.00645536	1SM	2	0.0048486	CKR	4	0.00203339
																								B56	2	0.00517344							XFK	1	0.0205381	74W	1	0.00645536	F42	2	0.0048486	9OJ	4	0.00203339
																								B54	2	0.00517344							XAN	1	0.0205381	78K	1	0.00645536	F63	2	0.0048486	QJ2	4	0.00203339
																								B53	2	0.00517344							X48	1	0.0205381	X21	1	0.00645536	BY7	2	0.0048486	PXL	4	0.00203339
																								AT6	2	0.00517344							VOH	1	0.0205381	WOS	1	0.00645536	VEA	2	0.0048486	UD2	4	0.00203339
																								EQJ	2	0.00517344							VBN	1	0.0205381	7G6	1	0.00645536	BX9	2	0.0048486	HSO	4	0.00203339
																								FLU	2	0.00517344							URI	1	0.0205381	849	1	0.00645536	1WD	2	0.0048486	UN9	4	0.00203339
																								7AP	2	0.00517344							UPG	1	0.0205381	8JL	1	0.00645536	FAQ	2	0.0048486	M94	4	0.00203339
																								7S7	2	0.00517344							UDM	1	0.0205381	84J	1	0.00645536	1QS	2	0.0048486	1EV	4	0.00203339
																								J14	2	0.00517344							U2F	1	0.0205381	84T	1	0.00645536	T03	2	0.0048486	PL6	4	0.00203339
																								J11	2	0.00517344							TV1	1	0.0205381	8E8	1	0.00645536	ZX6	2	0.0048486	6MA	4	0.00203339
																								IZC	2	0.00517344							TPT	1	0.0205381	W80	1	0.00645536	SV7	2	0.0048486	2SN	4	0.00203339
																								7M3	2	0.00517344							THS	1	0.0205381	W69	1	0.00645536	KXB	2	0.0048486	CRQ	4	0.00203339
																								7PJ	2	0.00517344							TB8	1	0.0205381	8F1	1	0.00645536	213	2	0.0048486	NSQ	4	0.00203339
																								7PS	2	0.00517344							T34	1	0.0205381	W2R	1	0.00645536	STL	2	0.0048486	6MD	4	0.00203339
																								IGP	2	0.00517344							SYN	1	0.0205381	8J1	1	0.00645536	214	2	0.0048486	Q16	4	0.00203339
																								IGA	2	0.00517344							SPS	1	0.0205381	8J8	1	0.00645536	VNL	2	0.0048486	4CT	4	0.00203339
																								7PV	2	0.00517344							SL6	1	0.0205381	UPX	1	0.00645536	26G	2	0.0048486	Q13	4	0.00203339
																								7VJ	2	0.00517344							SI0	1	0.0205381	A52	1	0.00645536	TPQ	2	0.0048486	W67	4	0.00203339
																								8Y7	2	0.00517344							SAL	1	0.0205381	A3N	1	0.00645536	VAB	2	0.0048486	XFK	4	0.00203339
																								HW9	2	0.00517344							ND7	1	0.0205381	BLV	1	0.00645536	BRN	2	0.0048486	UNL	4	0.00203339
																								HW8	2	0.00517344							MZ0	1	0.0205381	B5B	1	0.00645536	U2Z	2	0.0048486	HIC	4	0.00203339
																								HW0	2	0.00517344							CPZ	1	0.0205381	BBQ	1	0.00645536	CJC	2	0.0048486	KL7	4	0.00203339
																								HPY	2	0.00517344							GUN	1	0.0205381	BBY	1	0.00645536	CIE	2	0.0048486	XH8	4	0.00203339
																								H65	2	0.00517344							GT2	1	0.0205381	BCA	1	0.00645536	UHX	2	0.0048486	HAN	4	0.00203339
																								8CX	2	0.00517344							GK8	1	0.0205381	BEN	1	0.00645536	EBP	2	0.0048486	KL4	4	0.00203339
																								8F1	2	0.00517344							YU7	1	0.0205381	BEW	1	0.00645536	CHL	2	0.0048486	JFD	3	0.00152504
																								5RU	2	0.00517344							GDE	1	0.0205381	BEZ	1	0.00645536	E13	2	0.0048486	IPH	3	0.00152504
																								G5A	2	0.00517344							GB7	1	0.0205381	BL3	1	0.00645536	KM5	2	0.0048486	ITT	3	0.00152504
																								L34	2	0.00517344							G46	1	0.0205381	U20	1	0.00645536	CH6	2	0.0048486	6OG	3	0.00152504
																								B29	2	0.00517344							FZK	1	0.0205381	BML	1	0.00645536	UPF	2	0.0048486	P94	3	0.00152504
																								UPG	2	0.00517344							FYO	1	0.0205381	B28	1	0.00645536	1EU	2	0.0048486	PPD	3	0.00152504
																								PLT	2	0.00517344							FTH	1	0.0205381	TYS	1	0.00645536	V67	2	0.0048486	I13	3	0.00152504
																								TAP	2	0.00517344							FGN	1	0.0205381	TYM	1	0.00645536	1EV	2	0.0048486	2BO	3	0.00152504
																								PE0	2	0.00517344							FG8	1	0.0205381	TY4	1	0.00645536	UPG	2	0.0048486	6NT	3	0.00152504
																								PDD	2	0.00517344							FA5	1	0.0205381	BTM	1	0.00645536	KMK	2	0.0048486	KMV	3	0.00152504
																								22D	2	0.00517344							ENO	1	0.0205381	BNZ	1	0.00645536	1LJ	2	0.0048486	PCR	3	0.00152504
																								P91	2	0.00517344							EMT	1	0.0205381	BP5	1	0.00645536	1MM	2	0.0048486	G4M	3	0.00152504
																								OT4	2	0.00517344							EB4	1	0.0205381	BQ4	1	0.00645536	TYP	2	0.0048486	HBI	3	0.00152504
																								OSY	2	0.00517344							E40	1	0.0205381	BRH	1	0.00645536	TYD	2	0.0048486	QVS	3	0.00152504
																								ORX	2	0.00517344							DUP	1	0.0205381	BSV	1	0.00645536	TXD	2	0.0048486	PDD	3	0.00152504
																								URI	2	0.00517344							DTR	1	0.0205381	B29	1	0.00645536	KL7	2	0.0048486	6DF	3	0.00152504
																								ODP	2	0.00517344							DCT	1	0.0205381	B0V	1	0.00645536	FEG	2	0.0048486	JHT	3	0.00152504
																								NX6	2	0.00517344							CZA	1	0.0205381	AB1	1	0.00645536	1XD	2	0.0048486	Q15	3	0.00152504
																								V67	2	0.00517344							CYC	1	0.0205381	UGA	1	0.00645536	6CN	2	0.0048486	KL1	3	0.00152504
																								1Q7	2	0.00517344							GTQ	1	0.0205381	TPT	1	0.00645536	BEZ	2	0.0048486	2K8	3	0.00152504
																								VNL	2	0.00517344							H6M	1	0.0205381	ADN	1	0.00645536	MA7	2	0.0048486	RAR	3	0.00152504
																								NJP	2	0.00517344							MTV	1	0.0205381	UNL	1	0.00645536	FTP	2	0.0048486	HWU	3	0.00152504
																								NIO	2	0.00517344							H8N	1	0.0205381	AE0	1	0.00645536	2J7	2	0.0048486	HW9	3	0.00152504
																								W66	2	0.00517344							MSR	1	0.0205381	6TD	1	0.00645536	S85	2	0.0048486	PLT	3	0.00152504
																								PLQ	2	0.00517344							M74	1	0.0205381	AF8	1	0.00645536	BJS	2	0.0048486	726	3	0.00152504
																								3D1	2	0.00517344							M72	1	0.0205381	TSU	1	0.00645536	2LL	2	0.0048486	2NF	3	0.00152504
																								NAR	2	0.00517344							LU2	1	0.0205381	AIQ	1	0.00645536	6A5	2	0.0048486	KLA	3	0.00152504
																								ST9	2	0.00517344							LSW	1	0.0205381	AIR	1	0.00645536	DX2	2	0.0048486	PM9	3	0.00152504
																								2QG	2	0.00517344							LLP	1	0.0205381	UDX	1	0.00645536	S2O	2	0.0048486	HI6	3	0.00152504
																								2PH	2	0.00517344							LFK	1	0.0205381	U31	1	0.00645536	6AZ	2	0.0048486	QJ8	3	0.00152504
																								S85	2	0.00517344							KU4	1	0.0205381	BZ6	1	0.00645536	S0N	2	0.0048486	7MG	3	0.00152504
																								2OD	2	0.00517344							KU0	1	0.0205381	ANZ	1	0.00645536	FTG	2	0.0048486	2M3	3	0.00152504
																								2L2	2	0.00517344							KMY	1	0.0205381	AOC	1	0.00645536	VSE	2	0.0048486	PPY	3	0.00152504
																								2L1	2	0.00517344							KG8	1	0.0205381	APR	1	0.00645536	R6W	2	0.0048486	HSA	3	0.00152504
																								SCA	2	0.00517344							KCH	1	0.0205381	AR6	1	0.00645536	RC7	2	0.0048486	5R0	3	0.00152504
																								QJ4	2	0.00517344							JSE	1	0.0205381	UAG	1	0.00645536	BHW	2	0.0048486	RMT	3	0.00152504
																								SGP	2	0.00517344							IRP	1	0.0205381	U49	1	0.00645536	675	2	0.0048486	KM7	3	0.00152504
																								328	2	0.00517344							HSM	1	0.0205381	AUY	1	0.00645536	IZ9	2	0.0048486	GHP	3	0.00152504
																								SK6	2	0.00517344							HQQ	1	0.0205381	AWV	1	0.00645536	FYD	2	0.0048486	QUE	3	0.00152504
																								SKO	2	0.00517344							HQJ	1	0.0205381	6TJ	1	0.00645536	2AN	2	0.0048486	HT6	3	0.00152504
																								Q4A	2	0.00517344							HPR	1	0.0205381	N6B	1	0.00645536	SH3	2	0.0048486	GFB	3	0.00152504
																								SRP	2	0.00517344							HPA	1	0.0205381	6T6	1	0.00645536	DX8	2	0.0048486	6P0	3	0.00152504
																								Q10	2	0.00517344							HDX	1	0.0205381	2P3	1	0.00645536	93A	2	0.0048486	KN4	3	0.00152504
																								Q05	2	0.00517344							HA6	1	0.0205381	2QX	1	0.00645536	LGE	2	0.0048486	S5D	3	0.00152504
																								PUR	2	0.00517344							033	1	0.0205381	2R8	1	0.00645536	919	2	0.0048486	HW8	3	0.00152504
																								NCN	2	0.00517344										ZAS	1	0.00645536	SKO	2	0.0048486	GYS	3	0.00152504
																								S7K	2	0.00517344										2TM	1	0.00645536	SB7	2	0.0048486	OU7	3	0.00152504
																								XH8	2	0.00517344										2V2	1	0.00645536	6D3	2	0.0048486	M85	3	0.00152504
																								1D6	2	0.00517344										2V3	1	0.00645536	L69	2	0.0048486	CHQ	3	0.00152504
																								MCF	2	0.00517344										2YK	1	0.00645536	37J	2	0.0048486	DGI	3	0.00152504
																								XTZ	2	0.00517344										30B	1	0.00645536	9DP	1	0.0024243	DGP	3	0.00152504
																								M98	2	0.00517344										31B	1	0.00645536	8J7	1	0.0024243	XFJ	3	0.00152504
																								M7K	2	0.00517344										365	1	0.00645536	9FE	1	0.0024243	XFN	3	0.00152504
																								MRR	2	0.00517344										36X	1	0.00645536	946	1	0.0024243	U06	3	0.00152504
																								M62	2	0.00517344										386	1	0.00645536	9RC	1	0.0024243	TZD	3	0.00152504
																								M46	2	0.00517344										38Y	1	0.00645536	84P	1	0.0024243	M4R	3	0.00152504
																								0J2	2	0.00517344										Z8B	1	0.00645536	83D	1	0.0024243	M48	3	0.00152504
																								LSN	2	0.00517344										3C4	1	0.00645536	8J4	1	0.0024243	MTH	3	0.00152504
																								XFM	2	0.00517344										3D0	1	0.00645536	95J	1	0.0024243	9M9	3	0.00152504
																								17E	2	0.00517344										3ES	1	0.00645536	9VL	1	0.0024243	S71	3	0.00152504
																								0HY	2	0.00517344										Z77	1	0.00645536	8HW	1	0.0024243	CH6	3	0.00152504
																								0GD	2	0.00517344										3FP	1	0.00645536	99J	1	0.0024243	TUE	3	0.00152504
																								12S	2	0.00517344										3GP	1	0.00645536	9Y1	1	0.0024243	DND	3	0.00152504
																								MHS	2	0.00517344										3HU	1	0.00645536	8F7	1	0.0024243	3PZ	3	0.00152504
																								W79	2	0.00517344										3JB	1	0.00645536	953	1	0.0024243	DOW	3	0.00152504
																								W80	2	0.00517344										3LV	1	0.00645536	9WK	1	0.0024243	XX4	3	0.00152504
																								WAQ	2	0.00517344										2P5	1	0.00645536	8VW	1	0.0024243	TQP	3	0.00152504
																								1LD	2	0.00517344										2KA	1	0.00645536	8J8	1	0.0024243	1Q7	3	0.00152504
																								X2D	2	0.00517344										3P0	1	0.00645536	8QV	1	0.0024243	XYQ	3	0.00152504
																								ZEA	2	0.00517344										2JX	1	0.00645536	9L3	1	0.0024243	XAN	3	0.00152504
																								0NV	1	0.00258672										0UT	1	0.00645536	9LN	1	0.0024243	1LQ	3	0.00152504
																								08R	1	0.00258672										0XA	1	0.00645536	920	1	0.0024243	DTQ	3	0.00152504
																								2AM	1	0.00258672										ZYA	1	0.00645536	92Y	1	0.0024243	NPO	3	0.00152504
																								2AQ	1	0.00258672										145	1	0.00645536	8VT	1	0.0024243	W69	3	0.00152504
																								925	1	0.00258672										14T	1	0.00645536	96M	1	0.0024243	W64	3	0.00152504
																								0O2	1	0.00258672										16B	1	0.00645536	8SK	1	0.0024243	NTM	3	0.00152504
																								2BO	1	0.00258672										18T	1	0.00645536	8EY	1	0.0024243	4CA	3	0.00152504
																								96M	1	0.00258672										1AW	1	0.00645536	9JG	1	0.0024243	VRB	3	0.00152504
																								2CH	1	0.00258672										1B2	1	0.00645536	883	1	0.0024243	CQG	3	0.00152504
																								9FL	1	0.00258672										1EW	1	0.00645536	86B	1	0.0024243	1BN	3	0.00152504
																								0J5	1	0.00258672										1JF	1	0.00645536	9FU	1	0.0024243	MRS	3	0.00152504
																								9L3	1	0.00258672										1MZ	1	0.00645536	9FJ	1	0.0024243	9UO	3	0.00152504
																								2IK	1	0.00258672										1PR	1	0.00645536	84S	1	0.0024243	1ET	3	0.00152504
																								9BG	1	0.00258672										1PS	1	0.00645536	8OG	1	0.0024243	AHN	3	0.00152504
																								0FX	1	0.00258672										1YG	1	0.00645536	8NN	1	0.0024243	1EW	3	0.00152504
																								2KF	1	0.00258672										21D	1	0.00645536	8K0	1	0.0024243	CNA	3	0.00152504
																								0R7	1	0.00258672										27D	1	0.00645536	9M9	1	0.0024243	OAD	3	0.00152504
																								AS6	1	0.00258672										2AZ	1	0.00645536	9NW	1	0.0024243	DCS	3	0.00152504
																								9DI	1	0.00258672										2BA	1	0.00645536	9O9	1	0.0024243	OAN	3	0.00152504
																								9HG	1	0.00258672										2DZ	1	0.00645536	8YZ	1	0.0024243	9P4	3	0.00152504
																								9G1	1	0.00258672										2GB	1	0.00645536	8JX	1	0.0024243	DDF	3	0.00152504
																								0N8	1	0.00258672										ZNB	1	0.00645536	8E9	1	0.0024243	UGA	3	0.00152504
																								ALN	1	0.00258672										2GP	1	0.00645536	8JT	1	0.0024243	M87	3	0.00152504
																								AS3	1	0.00258672										3OV	1	0.00645536	9Q5	1	0.0024243	1Q9	3	0.00152504
																								1QS	1	0.00258672										3QC	1	0.00645536	8JR	1	0.0024243	OQN	3	0.00152504
																								1VE	1	0.00258672										C5P	1	0.00645536	9PO	1	0.0024243	W82	3	0.00152504
																								18W	1	0.00258672										52T	1	0.00645536	ZYM	1	0.0024243	C6P	3	0.00152504
																								91K	1	0.00258672										55W	1	0.00645536	A07	1	0.0024243	SAL	3	0.00152504
																								A5A	1	0.00258672										58D	1	0.00645536	BZI	1	0.0024243	BML	3	0.00152504
																								1BM	1	0.00258672										58K	1	0.00645536	CFF	1	0.0024243	C12	3	0.00152504
																								1SQ	1	0.00258672										58L	1	0.00645536	CC6	1	0.0024243	N22	3	0.00152504
																								1Q9	1	0.00258672										YE5	1	0.00645536	CBQ	1	0.0024243	YSA	3	0.00152504
																								29D	1	0.00258672										5FK	1	0.00645536	CBN	1	0.0024243	OS2	3	0.00152504
																								1DA	1	0.00258672										XX6	1	0.00645536	C3P	1	0.0024243	8LA	3	0.00152504
																								1EJ	1	0.00258672										XIM	1	0.00645536	C3K	1	0.0024243	ZEN	3	0.00152504
																								ACP	1	0.00258672										5KT	1	0.00645536	C2X	1	0.0024243	AVU	3	0.00152504
																								ADE	1	0.00258672										5NB	1	0.00645536	C2F	1	0.0024243	BYJ	3	0.00152504
																								1N1	1	0.00258672										5R2	1	0.00645536	C0W	1	0.0024243	STU	3	0.00152504
																								AIR	1	0.00258672										XG1	1	0.00645536	BZD	1	0.0024243	SGP	3	0.00152504
																								1W9	1	0.00258672										5XN	1	0.00645536	BNI	1	0.0024243	25U	3	0.00152504
																								A2P	1	0.00258672										5XO	1	0.00645536	BYJ	1	0.0024243	3HA	3	0.00152504
																								1XD	1	0.00258672										5XP	1	0.00645536	BYC	1	0.0024243	5AD	3	0.00152504
																								21M	1	0.00258672										60K	1	0.00645536	BXM	1	0.0024243	FE9	3	0.00152504
																								APC	1	0.00258672										620	1	0.00645536	BVS	1	0.0024243	C5P	3	0.00152504
																								9X0	1	0.00258672										67P	1	0.00645536	BVK	1	0.0024243	OUJ	3	0.00152504
																								9UY	1	0.00258672										6B9	1	0.00645536	BTJ	1	0.0024243	8EV	3	0.00152504
																								9TD	1	0.00258672										6ED	1	0.00645536	BR3	1	0.0024243	OS3	3	0.00152504
																								9PM	1	0.00258672										X7E	1	0.00645536	BR0	1	0.0024243	8DG	3	0.00152504
																								APR	1	0.00258672										6JQ	1	0.00645536	BPK	1	0.0024243	9CA	3	0.00152504
																								9P1	1	0.00258672										6LX	1	0.00645536	CFY	1	0.0024243	9BF	3	0.00152504
																								9OM	1	0.00258672										54R	1	0.00645536	CH7	1	0.0024243	THM	3	0.00152504
																								22E	1	0.00258672										523	1	0.00645536	CKH	1	0.0024243	OUG	3	0.00152504
																								22S	1	0.00258672										3SX	1	0.00645536	CLN	1	0.0024243	E89	3	0.00152504
																								AM9	1	0.00258672										YF7	1	0.00645536	D64	1	0.0024243	OSJ	3	0.00152504
																								9MG	1	0.00258672										3U2	1	0.00645536	D4B	1	0.0024243	OSY	3	0.00152504
																								29C	1	0.00258672										3Y6	1	0.00645536	D1Z	1	0.0024243	OT4	3	0.00152504
																								61O	1	0.00258672										3YH	1	0.00645536	D1Y	1	0.0024243	NIO	3	0.00152504
																								8NN	1	0.00258672										43Z	1	0.00645536	D1Q	1	0.0024243	TD6	3	0.00152504
																								91G	1	0.00258672										463	1	0.00645536	D1H	1	0.0024243	8VJ	3	0.00152504
																								4DT	1	0.00258672										Z1E	1	0.00645536	D0Q	1	0.0024243	MRR	2	0.00101669
																								6UE	1	0.00258672										481	1	0.00645536	D0K	1	0.0024243	NAE	2	0.00101669
																								4DN	1	0.00258672										49K	1	0.00645536	D0H	1	0.0024243	MQU	2	0.00101669
																								4DL	1	0.00258672										49L	1	0.00645536	D03	1	0.0024243	KEJ	2	0.00101669
																								6UH	1	0.00258672										4A0	1	0.00645536	CZO	1	0.0024243	45M	2	0.00101669
																								4DJ	1	0.00258672										4A2	1	0.00645536	CZ5	1	0.0024243	KMJ	2	0.00101669
																								4CO	1	0.00258672										Z1B	1	0.00645536	CWW	1	0.0024243	MXA	2	0.00101669
																								6UJ	1	0.00258672										4C5	1	0.00645536	CVJ	1	0.0024243	KMD	2	0.00101669
																								6UK	1	0.00258672										4C9	1	0.00645536	CR7	1	0.0024243	479	2	0.00101669
																								6UO	1	0.00258672										4DS	1	0.00645536	CPB	1	0.0024243	N5F	2	0.00101669
																								4AB	1	0.00258672										YX0	1	0.00645536	COH	1	0.0024243	KEV	2	0.00101669
																								413	1	0.00258672										4EY	1	0.00645536	CNA	1	0.0024243	KF1	2	0.00101669
																								78H	1	0.00258672										4K8	1	0.00645536	CMP	1	0.0024243	MT1	2	0.00101669
																								40Z	1	0.00258672										4NP	1	0.00645536	BNL	1	0.0024243	N1C	2	0.00101669
																								7HF	1	0.00258672										4P9	1	0.00645536	BML	1	0.0024243	N0Z	2	0.00101669
																								7KQ	1	0.00258672										4QZ	1	0.00645536	A4D	1	0.0024243	MTE	2	0.00101669
																								7KZ	1	0.00258672										4TC	1	0.00645536	AI	1	0.0024243	4BC	2	0.00101669
																								7L6	1	0.00258672										YOF	1	0.00645536	AX6	1	0.0024243	N09	2	0.00101669
																								3Y0	1	0.00258672										6LY	1	0.00645536	AX1	1	0.0024243	5NT	2	0.00101669
																								3XF	1	0.00258672										T5J	1	0.00645536	AWV	1	0.0024243	MQ1	2	0.00101669
																								6QB	1	0.00258672										THG	1	0.00645536	AW7	1	0.0024243	485	2	0.00101669
																								6NI	1	0.00258672										K3K	1	0.00645536	AVX	1	0.0024243	LCS	2	0.00101669
																								919	1	0.00258672										JXQ	1	0.00645536	AT1	1	0.0024243	MP5	2	0.00101669
																								6MZ	1	0.00258672										JXT	1	0.00645536	ARR	1	0.0024243	5HS	2	0.00101669
																								66A	1	0.00258672										JXW	1	0.00645536	AIV	1	0.0024243	BC3	2	0.00101669
																								5LK	1	0.00258672										JXZ	1	0.00645536	AIQ	1	0.0024243	53I	2	0.00101669
																								5JU	1	0.00258672										JY2	1	0.00645536	AHQ	1	0.0024243	5FV	2	0.00101669
																								69S	1	0.00258672										JY5	1	0.00645536	BM0	1	0.0024243	53R	2	0.00101669
																								5JT	1	0.00258672										JYB	1	0.00645536	AG7	1	0.0024243	53S	2	0.00101669
																								AWV	1	0.00258672										JYE	1	0.00645536	AEZ	1	0.0024243	LUW	2	0.00101669
																								5BG	1	0.00258672										JYK	1	0.00645536	ADJ	1	0.0024243	55V	2	0.00101669
																								5AD	1	0.00258672										JYN	1	0.00645536	ACQ	1	0.0024243	LNR	2	0.00101669
																								59W	1	0.00258672										JYQ	1	0.00645536	A85	1	0.0024243	5FU	2	0.00101669
																								523	1	0.00258672										JYT	1	0.00645536	A7D	1	0.0024243	LIX	2	0.00101669
																								518	1	0.00258672										JYW	1	0.00645536	A79	1	0.0024243	57X	2	0.00101669
																								4ZX	1	0.00258672										K0I	1	0.00645536	A78	1	0.0024243	57Y	2	0.00101669
																								4X8	1	0.00258672										K1Z	1	0.00645536	A6J	1	0.0024243	5A8	2	0.00101669
																								4WN	1	0.00258672										K28	1	0.00645536	AX8	1	0.0024243	5DK	2	0.00101669
																								4T1	1	0.00258672										K2H	1	0.00645536	AXI	1	0.0024243	L1B	2	0.00101669
																								6GU	1	0.00258672										K2K	1	0.00645536	AXK	1	0.0024243	5BX	2	0.00101669
																								6HL	1	0.00258672										K2U	1	0.00645536	AY5	1	0.0024243	L69	2	0.00101669
																								6M8	1	0.00258672										K2W	1	0.00645536	BL3	1	0.0024243	5AK	2	0.00101669
																								4HP	1	0.00258672										K30	1	0.00645536	BJV	1	0.0024243	LDC	2	0.00101669
																								7O3	1	0.00258672										K38	1	0.00645536	BJD	1	0.0024243	LZJ	2	0.00101669
																								3XE	1	0.00258672										K3E	1	0.00645536	BHJ	1	0.0024243	5IG	2	0.00101669
																								7PM	1	0.00258672										JXN	1	0.00645536	BGJ	1	0.0024243	ML6	2	0.00101669
																								3XD	1	0.00258672										JXB	1	0.00645536	BD9	1	0.0024243	5JL	2	0.00101669
																								8GD	1	0.00258672										JJ5	1	0.00645536	BCL	1	0.0024243	4EH	2	0.00101669
																								38D	1	0.00258672										OU7	1	0.00645536	BBY	1	0.0024243	4HG	2	0.00101669
																								8J1	1	0.00258672										HR5	1	0.00645536	BBV	1	0.0024243	4IG	2	0.00101669
																								37L	1	0.00258672										HTP	1	0.00645536	BBM	1	0.0024243	4IN	2	0.00101669
																								8J7	1	0.00258672										HTR	1	0.00645536	BAP	1	0.0024243	4LM	2	0.00101669
																								2RW	1	0.00258672										HWD	1	0.00645536	B5U	1	0.0024243	4MZ	2	0.00101669
																								2R7	1	0.00258672										I93	1	0.00645536	B5Q	1	0.0024243	M98	2	0.00101669
																								5N8	1	0.00258672										IAC	1	0.00645536	7ZV	1	0.0024243	KND	2	0.00101669
																								8OA	1	0.00258672										IBA	1	0.00645536	B47	1	0.0024243	KNS	2	0.00101669
																								2QQ	1	0.00258672										IBC	1	0.00645536	B46	1	0.0024243	M7K	2	0.00101669
																								2QP	1	0.00258672										IDC	1	0.00645536	B3C	1	0.0024243	KNV	2	0.00101669
																								2QN	1	0.00258672										IDD	1	0.00645536	B2Y	1	0.0024243	4RA	2	0.00101669
																								8Y4	1	0.00258672										OS7	1	0.00645536	B06	1	0.0024243	M62	2	0.00101669
																								2QK	1	0.00258672										JDG	1	0.00645536	829	1	0.0024243	KOU	2	0.00101669
																								8ZT	1	0.00258672										IKY	1	0.00645536	5SZ	1	0.0024243	M46	2	0.00101669
																								8ZW	1	0.00258672										ILA	1	0.00645536	7ZC	1	0.0024243	KPJ	2	0.00101669
																								8ZX	1	0.00258672										ON4	1	0.00645536	1XC	1	0.0024243	KQE	2	0.00101669
																								90J	1	0.00258672										INO	1	0.00645536	2BJ	1	0.0024243	M1V	2	0.00101669
																								90P	1	0.00258672										IOB	1	0.00645536	2B7	1	0.0024243	51P	2	0.00101669
																								8FQ	1	0.00258672										OMV	1	0.00645536	29J	1	0.0024243	5UJ	2	0.00101669
																								8F7	1	0.00258672										OMS	1	0.00645536	29B	1	0.0024243	001	2	0.00101669
																								38H	1	0.00258672										J1E	1	0.00645536	28G	1	0.0024243	KCH	2	0.00101669
																								7Z1	1	0.00258672										J42	1	0.00645536	28F	1	0.0024243	625	2	0.00101669
																								3XC	1	0.00258672										JA2	1	0.00645536	26O	1	0.0024243	DIH	2	0.00101669
																								3XB	1	0.00258672										K3H	1	0.00645536	218	1	0.0024243	DH3	2	0.00101669
																								7S9	1	0.00258672										K54	1	0.00645536	20Z	1	0.0024243	DH1	2	0.00101669
																								3XA	1	0.00258672										HM7	1	0.00645536	1YP	1	0.0024243	9OM	2	0.00101669
																								7X4	1	0.00258672										K9L	1	0.00645536	1YO	1	0.0024243	9OS	2	0.00101669
																								3VJ	1	0.00258672										LXX	1	0.00645536	1YM	1	0.0024243	9P1	2	0.00101669
																								3N6	1	0.00258672										LYE	1	0.00645536	1Y0	1	0.0024243	DDT	2	0.00101669
																								7X7	1	0.00258672										M2C	1	0.00645536	1WH	1	0.0024243	DCT	2	0.00101669
																								3II	1	0.00258672										M2F	1	0.00645536	2CX	1	0.0024243	9PM	2	0.00101669
																								3CQ	1	0.00258672										M3Q	1	0.00645536	1W3	1	0.0024243	DB8	2	0.00101669
																								7ZA	1	0.00258672										OHI	1	0.00645536	1VW	1	0.0024243	9QO	2	0.00101669
																								3HH	1	0.00258672										M7K	1	0.00645536	1VP	1	0.0024243	9QR	2	0.00101669
																								809	1	0.00258672										O1N	1	0.00645536	1VD	1	0.0024243	D8M	2	0.00101669
																								3F2	1	0.00258672										NWD	1	0.00645536	1US	1	0.0024243	9RX	2	0.00101669
																								8AX	1	0.00258672										NUP	1	0.00645536	1UP	1	0.0024243	D8G	2	0.00101669
																								3ES	1	0.00258672										MBN	1	0.00645536	1TM	1	0.0024243	9UL	2	0.00101669
																								8BX	1	0.00258672										MGT	1	0.00645536	1SQ	1	0.0024243	9YM	2	0.00101669
																								8CS	1	0.00258672										NPO	1	0.00645536	1R4	1	0.0024243	D3J	2	0.00101669
																								ZX7	1	0.00258672										NIT	1	0.00645536	1QR	1	0.0024243	A2R	2	0.00101669
																								GIM	1	0.00258672										MP9	1	0.00645536	1QK	1	0.0024243	9MG	2	0.00101669
																								AXW	1	0.00258672										MPK	1	0.00645536	1PS	1	0.0024243	DMD	2	0.00101669
																								NDV	1	0.00258672										MSR	1	0.00645536	1PP	1	0.0024243	DMI	2	0.00101669
																								NOV	1	0.00258672										NGV	1	0.00645536	2C5	1	0.0024243	E20	2	0.00101669
																								NRQ	1	0.00258672										MTX	1	0.00645536	2DX	1	0.0024243	EMS	2	0.00101669
																								NVX	1	0.00258672										MVL	1	0.00645536	1OT	1	0.0024243	EL5	2	0.00101669
																								OE4	1	0.00258672										N8Z	1	0.00645536	35K	1	0.0024243	8Y6	2	0.00101669
																								OMR	1	0.00258672										N42	1	0.00645536	3LL	1	0.0024243	8YA	2	0.00101669
																								P5P	1	0.00258672										N87	1	0.00645536	3KH	1	0.0024243	90P	2	0.00101669
																								P94	1	0.00258672										OL7	1	0.00645536	3HU	1	0.0024243	ED5	2	0.00101669
																								PAB	1	0.00258672										OLJ	1	0.00645536	3GO	1	0.0024243	ED2	2	0.00101669
																								PBG	1	0.00258672										LKT	1	0.00645536	3F2	1	0.0024243	91G	2	0.00101669
																								PBV	1	0.00258672										KY8	1	0.00645536	3EL	1	0.0024243	DZG	2	0.00101669
																								PDC	1	0.00258672										KB2	1	0.00645536	3EH	1	0.0024243	DOO	2	0.00101669
																								PGU	1	0.00258672										KF5	1	0.00645536	3E8	1	0.0024243	DZF	2	0.00101669
																								PHI	1	0.00258672										KHS	1	0.00645536	3C4	1	0.0024243	DYX	2	0.00101669
																								PHQ	1	0.00258672										OM7	1	0.00645536	39L	1	0.0024243	DYT	2	0.00101669
																								PL2	1	0.00258672										KLY	1	0.00645536	38B	1	0.0024243	9DG	2	0.00101669
																								PLI	1	0.00258672										KMA	1	0.00645536	37B	1	0.0024243	9GA	2	0.00101669
																								PNM	1	0.00258672										KNS	1	0.00645536	36X	1	0.0024243	DQU	2	0.00101669
																								PP3	1	0.00258672										KOZ	1	0.00645536	34M	1	0.0024243	9HG	2	0.00101669
																								PTH	1	0.00258672										KP8	1	0.00645536	2J5	1	0.0024243	9K9	2	0.00101669
																								QBV	1	0.00258672										KS1	1	0.00645536	335	1	0.0024243	A4D	2	0.00101669
																								QFG	1	0.00258672										L07	1	0.00645536	32Q	1	0.0024243	D2D	2	0.00101669
																								QHY	1	0.00258672										LDV	1	0.00645536	2YT	1	0.0024243	A6D	2	0.00101669
																								QL8	1	0.00258672										L18	1	0.00645536	2UX	1	0.0024243	BYB	2	0.00101669
																								NEP	1	0.00258672										OLY	1	0.00645536	2UC	1	0.0024243	AOY	2	0.00101669
																								NAE	1	0.00258672										L4T	1	0.00645536	2TY	1	0.0024243	C8Z	2	0.00101669
																								QSI	1	0.00258672										L5T	1	0.00645536	2SK	1	0.0024243	C8R	2	0.00101669
																								N7W	1	0.00258672										OLV	1	0.00645536	2SA	1	0.0024243	AR3	2	0.00101669
																								L0M	1	0.00258672										L9J	1	0.00645536	2QG	1	0.0024243	AT2	2	0.00101669
																								L4B	1	0.00258672										L9L	1	0.00645536	2P3	1	0.0024243	AT6	2	0.00101669
																								L68	1	0.00258672										L9M	1	0.00645536	2OD	1	0.0024243	AVJ	2	0.00101669
																								L90	1	0.00258672										L9N	1	0.00645536	2JL	1	0.0024243	BZH	2	0.00101669
																								LAD	1	0.00258672										L9P	1	0.00645536	2J6	1	0.0024243	BY7	2	0.00101669
																								LDP	1	0.00258672										HM9	1	0.00645536	1OU	1	0.0024243	ANH	2	0.00101669
																								LDV	1	0.00258672										OUB	1	0.00645536	1OS	1	0.0024243	AXW	2	0.00101669
																								LKQ	1	0.00258672										CC5	1	0.00645536	7YU	1	0.0024243	BSM	2	0.00101669
																								LLP	1	0.00258672										FDI	1	0.00645536	0JK	1	0.0024243	B38	2	0.00101669
																								LT2	1	0.00258672										DJD	1	0.00645536	0WH	1	0.0024243	B47	2	0.00101669
																								LTS	1	0.00258672										QVS	1	0.00645536	0V0	1	0.0024243	B49	2	0.00101669
																								M1W	1	0.00258672										DOC	1	0.00645536	0SW	1	0.0024243	BES	2	0.00101669
																								M5K	1	0.00258672										DPN	1	0.00645536	0SS	1	0.0024243	BAB	2	0.00101669
																								M68	1	0.00258672										QUP	1	0.00645536	0RU	1	0.0024243	BDO	2	0.00101669
																								MC4	1	0.00258672										DTA	1	0.00645536	0RA	1	0.0024243	CAG	2	0.00101669
																								MCT	1	0.00258672										DUR	1	0.00645536	0R9	1	0.0024243	CGR	2	0.00101669
																								MF5	1	0.00258672										DV7	1	0.00645536	0R6	1	0.0024243	A7D	2	0.00101669
																								MGD	1	0.00258672										QM1	1	0.00645536	0R5	1	0.0024243	CQW	2	0.00101669
																								MKW	1	0.00258672										EDA	1	0.00645536	0R2	1	0.0024243	D15	2	0.00101669
																								MTE	1	0.00258672										EF2	1	0.00645536	0OV	1	0.0024243	AAM	2	0.00101669
																								MTX	1	0.00258672										QJ2	1	0.00645536	0MX	1	0.0024243	CYT	2	0.00101669
																								MVL	1	0.00258672										EHO	1	0.00645536	0JO	1	0.0024243	CXW	2	0.00101669
																								N5F	1	0.00258672										QI9	1	0.00645536	0FX	1	0.0024243	CWE	2	0.00101669
																								QLP	1	0.00258672										EXI	1	0.00645536	0WT	1	0.0024243	CVI	2	0.00101669
																								RAI	1	0.00258672										EXJ	1	0.00645536	0DF	1	0.0024243	ADJ	2	0.00101669
																								KRZ	1	0.00258672										EZN	1	0.00645536	0AF	1	0.0024243	ADK	2	0.00101669
																								UXG	1	0.00258672										F2A	1	0.00645536	0A1	1	0.0024243	CQA	2	0.00101669
																								VKS	1	0.00258672										F6Y	1	0.00645536	08Y	1	0.0024243	CJ5	2	0.00101669
																								W30	1	0.00258672										F71	1	0.00645536	08F	1	0.0024243	CP3	2	0.00101669
																								WOS	1	0.00258672										F8K	1	0.00645536	06F	1	0.0024243	AFQ	2	0.00101669
																								WS6	1	0.00258672										F8N	1	0.00645536	065	1	0.0024243	CO4	2	0.00101669
																								WS7	1	0.00258672										QG2	1	0.00645536	055	1	0.0024243	CLZ	2	0.00101669
																								WSD	1	0.00258672										R78	1	0.00645536	051	1	0.0024243	CL9	2	0.00101669
																								X0B	1	0.00258672										DDJ	1	0.00645536	048	1	0.0024243	AIR	2	0.00101669
																								X2C	1	0.00258672										DCM	1	0.00645536	03P	1	0.0024243	AJZ	2	0.00101669
																								X2E	1	0.00258672										CRK	1	0.00645536	03L	1	0.0024243	CJC	2	0.00101669
																								X9F	1	0.00258672										TA9	1	0.00645536	01B	1	0.0024243	8WW	2	0.00101669
																								XAN	1	0.00258672										SV7	1	0.00645536	0WN	1	0.0024243	EQJ	2	0.00101669
																								XFH	1	0.00258672										CGW	1	0.00645536	0YJ	1	0.0024243	8P6	2	0.00101669
																								XFL	1	0.00258672										STU	1	0.00645536	1N1	1	0.0024243	6OZ	2	0.00101669
																								XJH	1	0.00258672										CLQ	1	0.00645536	1AM	1	0.0024243	IVU	2	0.00101669
																								XYQ	1	0.00258672										CNI	1	0.00645536	1N	1	0.0024243	6IP	2	0.00101669
																								Y2B	1	0.00258672										ST3	1	0.00645536	1MD	1	0.0024243	IRG	2	0.00101669
																								Y2F	1	0.00258672										SSU	1	0.00645536	1KS	1	0.0024243	IND	2	0.00101669
																								YAZ	1	0.00258672										SRM	1	0.00645536	1EW	1	0.0024243	6MZ	2	0.00101669
																								YC8	1	0.00258672										SMY	1	0.00645536	1ET	1	0.0024243	IDC	2	0.00101669
																								YH5	1	0.00258672										SMN	1	0.00645536	1EH	1	0.0024243	6NJ	2	0.00101669
																								Z17	1	0.00258672										ROC	1	0.00645536	1E8	1	0.0024243	I3A	2	0.00101669
																								Z25	1	0.00258672										CRQ	1	0.00645536	1E7	1	0.0024243	HW0	2	0.00101669
																								ZOL	1	0.00258672										S8Z	1	0.00645536	1E6	1	0.0024243	IXF	2	0.00101669
																								VBN	1	0.00258672										CVK	1	0.00645536	1E4	1	0.0024243	6P2	2	0.00101669
																								UW1	1	0.00258672										S8F	1	0.00645536	1BR	1	0.0024243	HTR	2	0.00101669
																								RCF	1	0.00258672										S7V	1	0.00645536	1BG	1	0.0024243	HQJ	2	0.00101669
																								UTP	1	0.00258672										S5P	1	0.00645536	1AU	1	0.0024243	HIP	2	0.00101669
																								RD2	1	0.00258672										D5Y	1	0.00645536	1A2	1	0.0024243	6UO	2	0.00101669
																								S20	1	0.00258672										RW1	1	0.00645536	105	1	0.0024243	71S	2	0.00101669
																								S42	1	0.00258672										RU4	1	0.00645536	1A0	1	0.0024243	725	2	0.00101669
																								S84	1	0.00258672										RS7	1	0.00645536	19X	1	0.0024243	H6Y	2	0.00101669
																								S90	1	0.00258672										QFM	1	0.00645536	199	1	0.0024243	IXE	2	0.00101669
																								S97	1	0.00258672										FH1	1	0.00645536	17N	1	0.0024243	6IG	2	0.00101669
																								SAL	1	0.00258672										HJH	1	0.00645536	16B	1	0.0024243	79B	2	0.00101669
																								SAM	1	0.00258672										FH4	1	0.00645536	14W	1	0.0024243	JJ5	2	0.00101669
																								SFC	1	0.00258672										GZV	1	0.00645536	14T	1	0.0024243	63Y	2	0.00101669
																								SIB	1	0.00258672										GZW	1	0.00645536	147	1	0.0024243	JWN	2	0.00101669
																								SL6	1	0.00258672										H08	1	0.00645536	13A	1	0.0024243	JSS	2	0.00101669
																								SRO	1	0.00258672										H0B	1	0.00645536	132	1	0.0024243	JSR	2	0.00101669
																								SSA	1	0.00258672										H0G	1	0.00645536	12T	1	0.0024243	JS2	2	0.00101669
																								ST4	1	0.00258672										H0H	1	0.00645536	12S	1	0.0024243	JRS	2	0.00101669
																								SVR	1	0.00258672										H0M	1	0.00645536	12E	1	0.0024243	JRR	2	0.00101669
																								T4K	1	0.00258672										H0N	1	0.00645536	3LN	1	0.0024243	6DR	2	0.00101669
																								THG	1	0.00258672										H0Q	1	0.00645536	3LO	1	0.0024243	JI5	2	0.00101669
																								TMP	1	0.00258672										H17	1	0.00645536	3OU	1	0.0024243	J11	2	0.00101669
																								TSS	1	0.00258672										H1G	1	0.00645536	605	1	0.0024243	JI4	2	0.00101669
																								TXC	1	0.00258672										H1Y	1	0.00645536	6EG	1	0.0024243	JI3	2	0.00101669
																								TYD	1	0.00258672										H2J	1	0.00645536	6EC	1	0.0024243	6FF	2	0.00101669
																								ULV	1	0.00258672										H2Y	1	0.00645536	6AV	1	0.0024243	6FJ	2	0.00101669
																								UNU	1	0.00258672										H3V	1	0.00645536	691	1	0.0024243	6FV	2	0.00101669
																								KXG	1	0.00258672										H61	1	0.00645536	68L	1	0.0024243	JDG	2	0.00101669
																								KNS	1	0.00258672										HEA	1	0.00645536	66P	1	0.0024243	6GC	2	0.00101669
																								B46	1	0.00258672										PMB	1	0.00645536	65Z	1	0.0024243	J14	2	0.00101669
																								D48	1	0.00258672										PHB	1	0.00645536	65Y	1	0.0024243	H65	2	0.00101669
																								D4X	1	0.00258672										HFD	1	0.00645536	64N	1	0.0024243	H2U	2	0.00101669
																								D5F	1	0.00258672										PGI	1	0.00645536	632	1	0.0024243	8OP	2	0.00101669
																								D60	1	0.00258672										PD5	1	0.00645536	62A	1	0.0024243	8N1	2	0.00101669
																								D8H	1	0.00258672										OUJ	1	0.00645536	615	1	0.0024243	FDA	2	0.00101669
																								DB8	1	0.00258672										POR	1	0.00645536	60G	1	0.0024243	FAO	2	0.00101669
																								DBE	1	0.00258672										PSU	1	0.00645536	5Y6	1	0.0024243	F91	2	0.00101669
																								DCM	1	0.00258672										GXG	1	0.00645536	6JP	1	0.0024243	F82	2	0.00101669
																								DGI	1	0.00258672										GI2	1	0.00645536	5Y0	1	0.0024243	F5N	2	0.00101669
																								DXW	1	0.00258672										FHD	1	0.00645536	5T5	1	0.0024243	8L1	2	0.00101669
																								E40	1	0.00258672										FNR	1	0.00645536	5T1	1	0.0024243	8M7	2	0.00101669
																								EQT	1	0.00258672										Q1T	1	0.00645536	D7A	1	0.0024243	F05	2	0.00101669
																								ES4	1	0.00258672										Q05	1	0.00645536	5SQ	1	0.0024243	EZ9	2	0.00101669
																								EZZ	1	0.00258672										PWU	1	0.00645536	5SI	1	0.0024243	FEG	2	0.00101669
																								F0B	1	0.00258672										G83	1	0.00645536	5RZ	1	0.0024243	EZ6	2	0.00101669
																								F4M	1	0.00258672										GBL	1	0.00645536	5RS	1	0.0024243	EXT	2	0.00101669
																								F8Z	1	0.00258672										PVQ	1	0.00645536	5QQ	1	0.0024243	8OF	2	0.00101669
																								FBD	1	0.00258672										GHV	1	0.00645536	5O1	1	0.0024243	8OG	2	0.00101669
																								FDA	1	0.00258672										GI1	1	0.00645536	5NG	1	0.0024243	EVO	2	0.00101669
																								FGD	1	0.00258672										GI3	1	0.00645536	5M8	1	0.0024243	EV5	2	0.00101669
																								FQG	1	0.00258672										GTZ	1	0.00645536	5M7	1	0.0024243	EV4	2	0.00101669
																								FQJ	1	0.00258672										GI4	1	0.00645536	6FW	1	0.0024243	EV3	2	0.00101669
																								FQM	1	0.00258672										PVK	1	0.00645536	6JT	1	0.0024243	8F1	2	0.00101669
																								FTR	1	0.00258672										GK7	1	0.00645536	3QT	1	0.0024243	FGT	2	0.00101669
																								D4O	1	0.00258672										GKA	1	0.00645536	73A	1	0.0024243	7E4	2	0.00101669
																								D1W	1	0.00258672										GKG	1	0.00645536	7YG	1	0.0024243	7Y1	2	0.00101669
																								FXH	1	0.00258672										GKJ	1	0.00645536	7S9	1	0.0024243	7IG	2	0.00101669
																								D0Q	1	0.00258672										ZZ4	1	0.00645536	7NC	1	0.0024243	GOV	2	0.00101669
																								B4N	1	0.00258672										GMQ	1	0.00645536	7LF	1	0.0024243	7M3	2	0.00101669
																								B4P	1	0.00258672										GMW	1	0.00645536	7JT	1	0.0024243	7S7	2	0.00101669
																								B52	1	0.00258672										PVG	1	0.00645536	7H7	1	0.0024243	7SG	2	0.00101669
																								BAB	1	0.00258672										0SR	1	0.00645536	7GC	1	0.0024243	GH3	2	0.00101669
																								BCO	1	0.00258672													7C5	1	0.0024243	7XO	2	0.00101669
																								BD2	1	0.00258672													78K	1	0.0024243	7XR	2	0.00101669
																								BEN	1	0.00258672													77D	1	0.0024243	G8J	2	0.00101669
																								BH3	1	0.00258672													769	1	0.0024243	8CX	2	0.00101669
																								BHW	1	0.00258672													752	1	0.0024243	7Z1	2	0.00101669
																								BYC	1	0.00258672													748	1	0.0024243	G6Y	2	0.00101669
																								C07	1	0.00258672													72S	1	0.0024243	G5P	2	0.00101669
																								C6P	1	0.00258672													6NJ	1	0.0024243	G1R	2	0.00101669
																								C8G	1	0.00258672													713	1	0.0024243	FZN	2	0.00101669
																								CAG	1	0.00258672													70N	1	0.0024243	FYX	2	0.00101669
																								CDP	1	0.00258672													70B	1	0.0024243	87R	2	0.00101669
																								CFE	1	0.00258672													6YQ	1	0.0024243	FM2	2	0.00101669
																								CH6	1	0.00258672													6XE	1	0.0024243	GNG	2	0.00101669
																								CJ5	1	0.00258672													6UU	1	0.0024243	BAX	2	0.00101669
																								CKT	1	0.00258672													6UG	1	0.0024243	P0P	2	0.00101669
																								CRU	1	0.00258672													6UF	1	0.0024243	OHI	2	0.00101669
																								CWC	1	0.00258672													6TU	1	0.0024243	17C	2	0.00101669
																								CXW	1	0.00258672													6TG	1	0.0024243	VXX	2	0.00101669
																								CXY	1	0.00258672													6S5	1	0.0024243	2MX	2	0.00101669
																								FTY	1	0.00258672													6S4	1	0.0024243	18H	2	0.00101669
																								FYB	1	0.00258672													6R4	1	0.0024243	QLR	2	0.00101669
																								KKY	1	0.00258672													5LA	1	0.0024243	PDA	2	0.00101669
																								IDC	1	0.00258672													5KS	1	0.0024243	PDC	2	0.00101669
																								IHM	1	0.00258672													5JG	1	0.0024243	VNL	2	0.00101669
																								INE	1	0.00258672													45E	1	0.0024243	PE1	2	0.00101669
																								IPH	1	0.00258672													4KN	1	0.0024243	PFG	2	0.00101669
																								IVU	1	0.00258672													4K0	1	0.0024243	PFT	2	0.00101669
																								IYT	1	0.00258672													4JZ	1	0.0024243	PGI	2	0.00101669
																								J37	1	0.00258672													4GJ	1	0.0024243	PHI	2	0.00101669
																								J4G	1	0.00258672													4GD	1	0.0024243	QJ4	2	0.00101669
																								J94	1	0.00258672													4FQ	1	0.0024243	PHQ	2	0.00101669
																								JDD	1	0.00258672													4EY	1	0.0024243	VGF	2	0.00101669
																								JI1	1	0.00258672													4E4	1	0.0024243	PIT	2	0.00101669
																								JI2	1	0.00258672													4DB	1	0.0024243	PK2	2	0.00101669
																								JI7	1	0.00258672													4BR	1	0.0024243	1CP	2	0.00101669
																								JK4	1	0.00258672													46O	1	0.0024243	PL4	2	0.00101669
																								JK5	1	0.00258672													46G	1	0.0024243	VG9	2	0.00101669
																								JRG	1	0.00258672													45M	1	0.0024243	W66	2	0.00101669
																								JRT	1	0.00258672													453	1	0.0024243	W79	2	0.00101669
																								JX5	1	0.00258672													5J5	1	0.0024243	P70	2	0.00101669
																								K26	1	0.00258672													44X	1	0.0024243	XFM	2	0.00101669
																								KDH	1	0.00258672													43K	1	0.0024243	0O2	2	0.00101669
																								KG8	1	0.00258672													437	1	0.0024243	OI1	2	0.00101669
																								KIM	1	0.00258672													436	1	0.0024243	RCO	2	0.00101669
																								KIU	1	0.00258672													3ZC	1	0.0024243	23G	2	0.00101669
																								KJH	1	0.00258672													3YY	1	0.0024243	2KE	2	0.00101669
																								IDP	1	0.00258672													3W1	1	0.0024243	2KF	2	0.00101669
																								I08	1	0.00258672													3VH	1	0.0024243	3LM	2	0.00101669
																								FYE	1	0.00258672													3VF	1	0.0024243	XJH	2	0.00101669
																								I01	1	0.00258672													3UT	1	0.0024243	R8A	2	0.00101669
																								FZK	1	0.00258672													3TY	1	0.0024243	T4K	2	0.00101669
																								FZN	1	0.00258672													3TQ	1	0.0024243	W80	2	0.00101669
																								G1K	1	0.00258672													3SX	1	0.0024243	3IG	2	0.00101669
																								G4P	1	0.00258672													4LS	1	0.0024243	TQ5	2	0.00101669
																								GHP	1	0.00258672													4MG	1	0.0024243	12S	2	0.00101669
																								ZTX	1	0.00258672													4NR	1	0.0024243	3HB	2	0.00101669
																								GQM	1	0.00258672													4S4	1	0.0024243	P35	2	0.00101669
																								GUN	1	0.00258672													5HU	1	0.0024243	3H9	2	0.00101669
																								GW9	1	0.00258672													5HG	1	0.0024243	141	2	0.00101669
																								H0Y	1	0.00258672													5FK	1	0.0024243	WAQ	2	0.00101669
																								H1A	1	0.00258672													5FF	1	0.0024243	P65	2	0.00101669
																								H2M	1	0.00258672													5F2	1	0.0024243	PLA	2	0.00101669
																								H3G	1	0.00258672													5EX	1	0.0024243	PLI	2	0.00101669
																								H4W	1	0.00258672													5ED	1	0.0024243	1D0	2	0.00101669
																								H5W	1	0.00258672													5CV	1	0.0024243	TQ4	2	0.00101669
																								H8B	1	0.00258672													5C3	1	0.0024243	TZ4	2	0.00101669
																								HA6	1	0.00258672													5AO	1	0.0024243	2WU	2	0.00101669
																								HC4	1	0.00258672													5AJ	1	0.0024243	TPS	2	0.00101669
																								HHV	1	0.00258672													57W	1	0.0024243	PZ1	2	0.00101669
																								HPR	1	0.00258672													57Q	1	0.0024243	TYD	2	0.00101669
																								HW4	1	0.00258672													56Z	1	0.0024243	PWV	2	0.00101669
																								HW5	1	0.00258672													56V	1	0.0024243	PXM	2	0.00101669
																								HYS	1	0.00258672													54R	1	0.0024243	TUH	2	0.00101669
																								033	1	0.00258672													523	1	0.0024243	TQ3	2	0.00101669
																								SUM	38659														50R	1	0.0024243	PYV	2	0.00101669
																																							50C	1	0.0024243	1NN	2	0.00101669
																																							4ZV	1	0.0024243	1OK	2	0.00101669
																																							4Z9	1	0.0024243	PY5	2	0.00101669
																																							4Z2	1	0.0024243	TQT	2	0.00101669
																																							4Z1	1	0.0024243	2XL	2	0.00101669
																																							4XK	1	0.0024243	PYO	2	0.00101669
																																							4XJ	1	0.0024243	2XN	2	0.00101669
																																							4XD	1	0.0024243	TQ6	2	0.00101669
																																							4TL	1	0.0024243	2XR	2	0.00101669
																																							D66	1	0.0024243	PYF	2	0.00101669
																																							FDB	1	0.0024243	TP9	2	0.00101669
																																							D8E	1	0.0024243	PUK	2	0.00101669
																																							OOH	1	0.0024243	PLK	2	0.00101669
																																							P90	1	0.0024243	V67	2	0.00101669
																																							P2Q	1	0.0024243	VBZ	2	0.00101669
																																							P27	1	0.0024243	PLZ	2	0.00101669
																																							OUJ	1	0.0024243	1D6	2	0.00101669
																																							OUB	1	0.0024243	QEI	2	0.00101669
																																							OU7	1	0.0024243	VAO	2	0.00101669
																																							OTR	1	0.0024243	1UD	2	0.00101669
																																							OSJ	1	0.0024243	PMG	2	0.00101669
																																							OOV	1	0.0024243	TDT	2	0.00101669
																																							OOU	1	0.0024243	QC2	2	0.00101669
																																							OOS	1	0.0024243	V3L	2	0.00101669
																																							OOQ	1	0.0024243	Q05	2	0.00101669
																																							OOO	1	0.0024243	1EJ	2	0.00101669
																																							ONC	1	0.0024243	35I	2	0.00101669
																																							QUS	1	0.0024243	POI	2	0.00101669
																																							OK3	1	0.0024243	Q24	2	0.00101669
																																							OJ4	1	0.0024243	TLP	2	0.00101669
																																							OHI	1	0.0024243	1QS	2	0.00101669
																																							OGH	1	0.0024243	TMQ	2	0.00101669
																																							ODB	1	0.0024243	TOI	2	0.00101669
																																							OCJ	1	0.0024243	Q10	2	0.00101669
																																							O9Z	1	0.0024243	RDC	2	0.00101669
																																							O5W	1	0.0024243	PYC	2	0.00101669
																																							O54	1	0.0024243	3SZ	2	0.00101669
																																							O3G	1	0.0024243	S79	2	0.00101669
																																							O1M	1	0.0024243	ZSP	2	0.00101669
																																							NZT	1	0.0024243	S85	2	0.00101669
																																							NYG	1	0.0024243	NCN	2	0.00101669
																																							P9P	1	0.0024243	NZO	2	0.00101669
																																							PAB	1	0.0024243	OAG	2	0.00101669
																																							PBD	1	0.0024243	OA5	2	0.00101669
																																							PFO	1	0.0024243	S7K	2	0.00101669
																																							QM1	1	0.0024243	07T	2	0.00101669
																																							QJJ	1	0.0024243	SSI	2	0.00101669
																																							QH4	1	0.0024243	NJP	2	0.00101669
																																							QCQ	1	0.0024243	OA1	2	0.00101669
																																							Q0K	1	0.0024243	NL8	2	0.00101669
																																							PYV	1	0.0024243	26D	2	0.00101669
																																							PVQ	1	0.0024243	41L	2	0.00101669
																																							PVK	1	0.0024243	O3Z	2	0.00101669
																																							PUR	1	0.0024243	087	2	0.00101669
																																							PT6	1	0.0024243	SRO	2	0.00101669
																																							PT1	1	0.0024243	08B	2	0.00101669
																																							PSA	1	0.0024243	0GD	2	0.00101669
																																							PP6	1	0.0024243	NLZ	2	0.00101669
																																							PNQ	1	0.0024243	2HC	2	0.00101669
																																							PNN	1	0.0024243	SKO	2	0.00101669
																																							PMT	1	0.0024243	YSU	2	0.00101669
																																							PLQ	1	0.0024243	2GJ	2	0.00101669
																																							PK5	1	0.0024243	YSC	2	0.00101669
																																							PIT	1	0.0024243	O16	2	0.00101669
																																							PIM	1	0.0024243	2EQ	2	0.00101669
																																							PHW	1	0.0024243	2FD	2	0.00101669
																																							PHT	1	0.0024243	NHV	2	0.00101669
																																							PHI	1	0.0024243	07N	2	0.00101669
																																							PHB	1	0.0024243	43O	2	0.00101669
																																							PH0	1	0.0024243	2B6	2	0.00101669
																																							PGI	1	0.0024243	RUT	2	0.00101669
																																							PFU	1	0.0024243	Y3U	2	0.00101669
																																							NXT	1	0.0024243	NVI	2	0.00101669
																																							NTZ	1	0.0024243	NFM	2	0.00101669
																																							NTM	1	0.0024243	3RH	2	0.00101669
																																							MCV	1	0.0024243	Y6W	2	0.00101669
																																							MBY	1	0.0024243	STL	2	0.00101669
																																							M8K	1	0.0024243	S48	2	0.00101669
																																							M85	1	0.0024243	290	2	0.00101669
																																							M82	1	0.0024243	S1T	2	0.00101669
																																							M7Z	1	0.0024243	2AN	2	0.00101669
																																							M7G	1	0.0024243	NGD	2	0.00101669
																																							M75	1	0.0024243	RRB	2	0.00101669
																																							M2K	1	0.0024243	2FA	2	0.00101669
																																							M2F	1	0.0024243	S14	2	0.00101669
																																							LZE	1	0.0024243	NVY	2	0.00101669
																																							LZD	1	0.0024243	42C	2	0.00101669
																																							LZA	1	0.0024243	ODP	2	0.00101669
																																							LZ0	1	0.0024243	91K	1	0.000508347
																																							LWH	1	0.0024243	1RB	1	0.000508347
																																							LUW	1	0.0024243	8BX	1	0.000508347
																																							LUE	1	0.0024243	91B	1	0.000508347
																																							LTZ	1	0.0024243	897	1	0.000508347
																																							LT2	1	0.0024243	2A9	1	0.000508347
																																							LQF	1	0.0024243	1RC	1	0.000508347
																																							LNR	1	0.0024243	896	1	0.000508347
																																							LMS	1	0.0024243	90N	1	0.000508347
																																							LKS	1	0.0024243	8CF	1	0.000508347
																																							LKQ	1	0.0024243	905	1	0.000508347
																																							LKM	1	0.0024243	91P	1	0.000508347
																																							LKG	1	0.0024243	8CO	1	0.000508347
																																							LK4	1	0.0024243	8AX	1	0.000508347
																																							LIA	1	0.0024243	920	1	0.000508347
																																							MC	1	0.0024243	24Z	1	0.000508347
																																							MD1	1	0.0024243	93G	1	0.000508347
																																							NSY	1	0.0024243	86V	1	0.000508347
																																							MEA	1	0.0024243	9EV	1	0.000508347
																																							NO9	1	0.0024243	879	1	0.000508347
																																							NNO	1	0.0024243	2AM	1	0.000508347
																																							NM8	1	0.0024243	9FL	1	0.000508347
																																							NKG	1	0.0024243	86Y	1	0.000508347
																																							NIT	1	0.0024243	9G1	1	0.000508347
																																							NHE	1	0.0024243	86A	1	0.000508347
																																							NCA	1	0.0024243	94F	1	0.000508347
																																							NAJ	1	0.0024243	9GD	1	0.000508347
																																							N9W	1	0.0024243	2AP	1	0.000508347
																																							N87	1	0.0024243	848	1	0.000508347
																																							N79	1	0.0024243	845	1	0.000508347
																																							N42	1	0.0024243	2AQ	1	0.000508347
																																							N1N	1	0.0024243	83P	1	0.000508347
																																							N0Z	1	0.0024243	2AH	1	0.000508347
																																							MZQ	1	0.0024243	9EK	1	0.000508347
																																							MZN	1	0.0024243	9DR	1	0.000508347
																																							MZJ	1	0.0024243	1QC	1	0.000508347
																																							MYC	1	0.0024243	9DA	1	0.000508347
																																							MVT	1	0.0024243	9D4	1	0.000508347
																																							MPL	1	0.0024243	9CQ	1	0.000508347
																																							MOK	1	0.0024243	1QF	1	0.000508347
																																							MNH	1	0.0024243	1QR	1	0.000508347
																																							MML	1	0.0024243	883	1	0.000508347
																																							ML6	1	0.0024243	8CS	1	0.000508347
																																							MJU	1	0.0024243	9BG	1	0.000508347
																																							MFE	1	0.0024243	1QZ	1	0.000508347
																																							MEK	1	0.0024243	96Q	1	0.000508347
																																							QSD	1	0.0024243	95L	1	0.000508347
																																							R24	1	0.0024243	95F	1	0.000508347
																																							D8K	1	0.0024243	1R0	1	0.000508347
																																							V9G	1	0.0024243	8CR	1	0.000508347
																																							W80	1	0.0024243	1VM	1	0.000508347
																																							W69	1	0.0024243	8ZT	1	0.000508347
																																							W68	1	0.0024243	8GM	1	0.000508347
																																							W67	1	0.0024243	20T	1	0.000508347
																																							W64	1	0.0024243	20R	1	0.000508347
																																							W45	1	0.0024243	8NN	1	0.000508347
																																							VXG	1	0.0024243	8NY	1	0.000508347
																																							VVQ	1	0.0024243	20O	1	0.000508347
																																							VS8	1	0.0024243	20M	1	0.000508347
																																							VS4	1	0.0024243	8NZ	1	0.000508347
																																							VS1	1	0.0024243	8O0	1	0.000508347
																																							VRA	1	0.0024243	8OD	1	0.000508347
																																							VG2	1	0.0024243	8HC	1	0.000508347
																																							V55	1	0.0024243	20J	1	0.000508347
																																							R30	1	0.0024243	8OH	1	0.000508347
																																							V0L	1	0.0024243	25R	1	0.000508347
																																							URI	1	0.0024243	1ZW	1	0.000508347
																																							UNI	1	0.0024243	8ON	1	0.000508347
																																							UML	1	0.0024243	20U	1	0.000508347
																																							UMA	1	0.0024243	21E	1	0.000508347
																																							UIH	1	0.0024243	8ME	1	0.000508347
																																							UI1	1	0.0024243	8KP	1	0.000508347
																																							UFT	1	0.0024243	242	1	0.000508347
																																							UEN	1	0.0024243	8IP	1	0.000508347
																																							UCC	1	0.0024243	8J7	1	0.000508347
																																							UAG	1	0.0024243	8JF	1	0.000508347
																																							U3X	1	0.0024243	25P	1	0.000508347
																																							U2F	1	0.0024243	8KM	1	0.000508347
																																							W82	1	0.0024243	22S	1	0.000508347
																																							W8G	1	0.0024243	21G	1	0.000508347
																																							W9Z	1	0.0024243	8L7	1	0.000508347
																																							WOS	1	0.0024243	22G	1	0.000508347
																																							ZSP	1	0.0024243	8HG	1	0.000508347
																																							ZEA	1	0.0024243	22E	1	0.000508347
																																							Z89	1	0.0024243	8HF	1	0.000508347
																																							Z83	1	0.0024243	21V	1	0.000508347
																																							Z80	1	0.0024243	1Y1	1	0.000508347
																																							Z63	1	0.0024243	26A	1	0.000508347
																																							YQY	1	0.0024243	8CU	1	0.000508347
																																							YL6	1	0.0024243	1XD	1	0.000508347
																																							YIY	1	0.0024243	1VO	1	0.000508347
																																							YIW	1	0.0024243	280	1	0.000508347
																																							YIS	1	0.0024243	8XL	1	0.000508347
																																							YIE	1	0.0024243	1VN	1	0.000508347
																																							YH6	1	0.0024243	282	1	0.000508347
																																							YH5	1	0.0024243	8XT	1	0.000508347
																																							YH3	1	0.0024243	286	1	0.000508347
																																							YH1	1	0.0024243	8DU	1	0.000508347
																																							XX8	1	0.0024243	8J1	1	0.000508347
																																							XTZ	1	0.0024243	8CY	1	0.000508347
																																							XP0	1	0.0024243	1UX	1	0.000508347
																																							XJO	1	0.0024243	1UN	1	0.000508347
																																							XHP	1	0.0024243	8YD	1	0.000508347
																																							XFM	1	0.0024243	29R	1	0.000508347
																																							X7G	1	0.0024243	8ZK	1	0.000508347
																																							X6G	1	0.0024243	8WT	1	0.000508347
																																							X4G	1	0.0024243	1VS	1	0.000508347
																																							X3G	1	0.0024243	8V0	1	0.000508347
																																							X39	1	0.0024243	8OX	1	0.000508347
																																							U14	1	0.0024243	1XC	1	0.000508347
																																							U13	1	0.0024243	1WK	1	0.000508347
																																							U12	1	0.0024243	8OW	1	0.000508347
																																							SYN	1	0.0024243	8F7	1	0.000508347
																																							SUY	1	0.0024243	26K	1	0.000508347
																																							SUE	1	0.0024243	26M	1	0.000508347
																																							SS6	1	0.0024243	1WJ	1	0.000508347
																																							SRE	1	0.0024243	1W9	1	0.000508347
																																							SQP	1	0.0024243	8QJ	1	0.000508347
																																							SNP	1	0.0024243	8QO	1	0.000508347
																																							SNO	1	0.0024243	270	1	0.000508347
																																							SNF	1	0.0024243	8S9	1	0.000508347
																																							SM4	1	0.0024243	8TK	1	0.000508347
																																							SKE	1	0.0024243	8UX	1	0.000508347
																																							SK6	1	0.0024243	43P	1	0.000508347
																																							SK3	1	0.0024243	1HN	1	0.000508347
																																							SJR	1	0.0024243	9GM	1	0.000508347
																																							SIB	1	0.0024243	AVO	1	0.000508347
																																							SE2	1	0.0024243	0NV	1	0.000508347
																																							SC5	1	0.0024243	APZ	1	0.000508347
																																							SAN	1	0.0024243	AQ3	1	0.000508347
																																							S97	1	0.0024243	AQO	1	0.000508347
																																							S90	1	0.0024243	0N8	1	0.000508347
																																							S7K	1	0.0024243	0MR	1	0.000508347
																																							S61	1	0.0024243	AS3	1	0.000508347
																																							S48	1	0.0024243	AS6	1	0.000508347
																																							S1S	1	0.0024243	ASE	1	0.000508347
																																							RHU	1	0.0024243	0LX	1	0.000508347
																																							RBN	1	0.0024243	0LD	1	0.000508347
																																							R4N	1	0.0024243	0L0	1	0.000508347
																																							R48	1	0.0024243	0KP	1	0.000508347
																																							SX8	1	0.0024243	0KM	1	0.000508347
																																							T1J	1	0.0024243	AU5	1	0.000508347
																																							TZ2	1	0.0024243	AUJ	1	0.000508347
																																							T3Y	1	0.0024243	0KE	1	0.000508347
																																							TYZ	1	0.0024243	AUN	1	0.000508347
																																							TYY	1	0.0024243	0K5	1	0.000508347
																																							TYQ	1	0.0024243	0O1	1	0.000508347
																																							TY4	1	0.0024243	APC	1	0.000508347
																																							TX7	1	0.0024243	0OU	1	0.000508347
																																							TX3	1	0.0024243	0UX	1	0.000508347
																																							TX1	1	0.0024243	0WT	1	0.000508347
																																							TTQ	1	0.0024243	AIQ	1	0.000508347
																																							TTP	1	0.0024243	0WD	1	0.000508347
																																							TSV	1	0.0024243	0WA	1	0.000508347
																																							TRQ	1	0.0024243	0VM	1	0.000508347
																																							TQQ	1	0.0024243	ALN	1	0.000508347
																																							TPS	1	0.0024243	0V3	1	0.000508347
																																							TMQ	1	0.0024243	0V2	1	0.000508347
																																							TM8	1	0.0024243	0U5	1	0.000508347
																																							TKW	1	0.0024243	0OX	1	0.000508347
																																							TIQ	1	0.0024243	0TM	1	0.000508347
																																							THP	1	0.0024243	AMR	1	0.000508347
																																							THK	1	0.0024243	0SY	1	0.000508347
																																							THA	1	0.0024243	ANL	1	0.000508347
																																							TGZ	1	0.0024243	0R4	1	0.000508347
																																							TDZ	1	0.0024243	AO6	1	0.000508347
																																							TAK	1	0.0024243	0QW	1	0.000508347
																																							TAA	1	0.0024243	AOB	1	0.000508347
																																							TA9	1	0.0024243	0J5	1	0.000508347
																																							T67	1	0.0024243	AW0	1	0.000508347
																																							T4B	1	0.0024243	9IP	1	0.000508347
																																							LHF	1	0.0024243	0FX	1	0.000508347
																																							LHD	1	0.0024243	B3Y	1	0.000508347
																																							L1O	1	0.0024243	B46	1	0.000508347
																																							FTJ	1	0.0024243	083	1	0.000508347
																																							G75	1	0.0024243	B48	1	0.000508347
																																							G65	1	0.0024243	B4P	1	0.000508347
																																							G3Z	1	0.0024243	B6A	1	0.000508347
																																							G1R	1	0.0024243	B6N	1	0.000508347
																																							G14	1	0.0024243	B77	1	0.000508347
																																							FYJ	1	0.0024243	B7Z	1	0.000508347
																																							FY7	1	0.0024243	B86	1	0.000508347
																																							FY4	1	0.0024243	07M	1	0.000508347
																																							FY1	1	0.0024243	B8P	1	0.000508347
																																							FXS	1	0.0024243	06W	1	0.000508347
																																							FXD	1	0.0024243	BA8	1	0.000508347
																																							FX7	1	0.0024243	06V	1	0.000508347
																																							FTR	1	0.0024243	BAH	1	0.000508347
																																							FTH	1	0.0024243	BAM	1	0.000508347
																																							L1C	1	0.0024243	06U	1	0.000508347
																																							FS8	1	0.0024243	BAW	1	0.000508347
																																							FQW	1	0.0024243	08R	1	0.000508347
																																							FQM	1	0.0024243	08W	1	0.000508347
																																							FQJ	1	0.0024243	B37	1	0.000508347
																																							FQA	1	0.0024243	AWO	1	0.000508347
																																							FO2	1	0.0024243	AW1	1	0.000508347
																																							FMW	1	0.0024243	0EX	1	0.000508347
																																							FLF	1	0.0024243	0CU	1	0.000508347
																																							FL1	1	0.0024243	AW2	1	0.000508347
																																							FKU	1	0.0024243	0CT	1	0.000508347
																																							FKR	1	0.0024243	0BX	1	0.000508347
																																							FK4	1	0.0024243	AW3	1	0.000508347
																																							FER	1	0.0024243	AWG	1	0.000508347
																																							G85	1	0.0024243	0B1	1	0.000508347
																																							G86	1	0.0024243	B1T	1	0.000508347
																																							G8A	1	0.0024243	AX8	1	0.000508347
																																							G8E	1	0.0024243	0AF	1	0.000508347
																																							H3A	1	0.0024243	AZ8	1	0.000508347
																																							H35	1	0.0024243	09L	1	0.000508347
																																							H33	1	0.0024243	AZY	1	0.000508347
																																							H32	1	0.0024243	B00	1	0.000508347
																																							H2D	1	0.0024243	B02	1	0.000508347
																																							H1J	1	0.0024243	B12	1	0.000508347
																																							H0V	1	0.0024243	0WY	1	0.000508347
																																							H0P	1	0.0024243	0XR	1	0.000508347
																																							GZT	1	0.0024243	AHF	1	0.000508347
																																							GZ8	1	0.0024243	0XT	1	0.000508347
																																							GWS	1	0.0024243	1LN	1	0.000508347
																																							GWD	1	0.0024243	1LM	1	0.000508347
																																							GVD	1	0.0024243	1LJ	1	0.000508347
																																							GUN	1	0.0024243	1KZ	1	0.000508347
																																							GTP	1	0.0024243	1KY	1	0.000508347
																																							GSP	1	0.0024243	1KU	1	0.000508347
																																							GRN	1	0.0024243	1KT	1	0.000508347
																																							GQ8	1	0.0024243	1K9	1	0.000508347
																																							GQ5	1	0.0024243	1JY	1	0.000508347
																																							GP3	1	0.0024243	824	1	0.000508347
																																							GOK	1	0.0024243	9PW	1	0.000508347
																																							GMK	1	0.0024243	1HE	1	0.000508347
																																							GM5	1	0.0024243	9QJ	1	0.000508347
																																							GJQ	1	0.0024243	1GZ	1	0.000508347
																																							GHX	1	0.0024243	1G4	1	0.000508347
																																							GBZ	1	0.0024243	1EU	1	0.000508347
																																							GBM	1	0.0024243	9R8	1	0.000508347
																																							FEJ	1	0.0024243	9RR	1	0.000508347
																																							FE1	1	0.0024243	1EB	1	0.000508347
																																							FBB	1	0.0024243	1LS	1	0.000508347
																																							DX7	1	0.0024243	9OT	1	0.000508347
																																							DX4	1	0.0024243	1LY	1	0.000508347
																																							DX3	1	0.0024243	9NB	1	0.000508347
																																							DX1	1	0.0024243	9JJ	1	0.000508347
																																							DWD	1	0.0024243	9JR	1	0.000508347
																																							DWB	1	0.0024243	9L3	1	0.000508347
																																							DVW	1	0.0024243	1OJ	1	0.000508347
																																							DVP	1	0.0024243	1NS	1	0.000508347
																																							DV7	1	0.0024243	9LZ	1	0.000508347
																																							DTR	1	0.0024243	1NR	1	0.000508347
																																							DTP	1	0.0024243	1NQ	1	0.000508347
																																							DTJ	1	0.0024243	9O2	1	0.000508347
																																							DPN	1	0.0024243	1LZ	1	0.000508347
																																							DOO	1	0.0024243	1NP	1	0.000508347
																																							DNQ	1	0.0024243	1NO	1	0.000508347
																																							DN4	1	0.0024243	1NM	1	0.000508347
																																							DMX	1	0.0024243	1NK	1	0.000508347
																																							DLZ	1	0.0024243	1MZ	1	0.000508347
																																							DL8	1	0.0024243	1MJ	1	0.000508347
																																							DKI	1	0.0024243	1MH	1	0.000508347
																																							DJW	1	0.0024243	9OQ	1	0.000508347
																																							DJF	1	0.0024243	9RZ	1	0.000508347
																																							DHY	1	0.0024243	9TD	1	0.000508347
																																							DHE	1	0.0024243	1DN	1	0.000508347
																																							DF7	1	0.0024243	15Q	1	0.000508347
																																							DCP	1	0.0024243	18V	1	0.000508347
																																							DBV	1	0.0024243	AC2	1	0.000508347
																																							D94	1	0.0024243	ACK	1	0.000508347
																																							DX6	1	0.0024243	ACO	1	0.000508347
																																							DYR	1	0.0024243	18G	1	0.000508347
																																							F9B	1	0.0024243	179	1	0.000508347
																																							E0F	1	0.0024243	16B	1	0.000508347
																																							F97	1	0.0024243	15V	1	0.000508347
																																							F8N	1	0.0024243	13X	1	0.000508347
																																							F6F	1	0.0024243	19P	1	0.000508347
																																							F4K	1	0.0024243	ADT	1	0.000508347
																																							F47	1	0.0024243	11X	1	0.000508347
																																							F46	1	0.0024243	AF8	1	0.000508347
																																							EZS	1	0.0024243	11F	1	0.000508347
																																							EZ9	1	0.0024243	11D	1	0.000508347
																																							EXG	1	0.0024243	10L	1	0.000508347
																																							ENZ	1	0.0024243	AGO	1	0.000508347
																																							EJW	1	0.0024243	0XU	1	0.000508347
																																							EJQ	1	0.0024243	AB4	1	0.000508347
																																							EJO	1	0.0024243	19X	1	0.000508347
																																							EHH	1	0.0024243	9UN	1	0.000508347
																																							EH8	1	0.0024243	A5L	1	0.000508347
																																							EGF	1	0.0024243	9UY	1	0.000508347
																																							EEY	1	0.0024243	9X8	1	0.000508347
																																							EEK	1	0.0024243	9YP	1	0.000508347
																																							EDD	1	0.0024243	9ZC	1	0.000508347
																																							EDB	1	0.0024243	A12	1	0.000508347
																																							ED2	1	0.0024243	A1O	1	0.000508347
																																							EBU	1	0.0024243	A1Z	1	0.000508347
																																							E68	1	0.0024243	A2M	1	0.000508347
																																							E5Z	1	0.0024243	1CK	1	0.000508347
																																							E1C	1	0.0024243	AAV	1	0.000508347
																																							E0R	1	0.0024243	A6I	1	0.000508347
																																							E0L	1	0.0024243	1BM	1	0.000508347
																																							H47	1	0.0024243	A7S	1	0.000508347
																																							H4B	1	0.0024243	A99	1	0.000508347
																																							H4G	1	0.0024243	1AH	1	0.000508347
																																							KI2	1	0.0024243	1A0	1	0.000508347
																																							KHH	1	0.0024243	AAQ	1	0.000508347
																																							KHE	1	0.0024243	AAT	1	0.000508347
																																							KHD	1	0.0024243	83D	1	0.000508347
																																							KH8	1	0.0024243	2GA	1	0.000508347
																																							KH5	1	0.0024243	81U	1	0.000508347
																																							KGZ	1	0.0024243	5AQ	1	0.000508347
																																							KDH	1	0.0024243	3FE	1	0.000508347
																																							KB1	1	0.0024243	5B6	1	0.000508347
																																							KA7	1	0.0024243	5BC	1	0.000508347
																																							K9Y	1	0.0024243	5BG	1	0.000508347
																																							K9J	1	0.0024243	5BH	1	0.000508347
																																							K6M	1	0.0024243	3FA	1	0.000508347
																																							K4T	1	0.0024243	5CV	1	0.000508347
																																							K3U	1	0.0024243	5CY	1	0.000508347
																																							K0G	1	0.0024243	3EM	1	0.000508347
																																							JZQ	1	0.0024243	3EF	1	0.000508347
																																							JZP	1	0.0024243	5DR	1	0.000508347
																																							JWY	1	0.0024243	5DY	1	0.000508347
																																							JW8	1	0.0024243	5DZ	1	0.000508347
																																							JW3	1	0.0024243	5F9	1	0.000508347
																																							JW1	1	0.0024243	3E2	1	0.000508347
																																							JUS	1	0.0024243	3CQ	1	0.000508347
																																							JU2	1	0.0024243	5GA	1	0.000508347
																																							JRA	1	0.0024243	3BG	1	0.000508347
																																							JR2	1	0.0024243	3AP	1	0.000508347
																																							JNH	1	0.0024243	3FY	1	0.000508347
																																							JJ5	1	0.0024243	3HH	1	0.000508347
																																							KHS	1	0.0024243	5JT	1	0.000508347
																																							KL1	1	0.0024243	59W	1	0.000508347
																																							JGG	1	0.0024243	53T	1	0.000508347
																																							KLY	1	0.0024243	53V	1	0.000508347
																																							L10	1	0.0024243	54K	1	0.000508347
																																							L0Z	1	0.0024243	3JR	1	0.000508347
																																							L0P	1	0.0024243	54X	1	0.000508347
																																							L00	1	0.0024243	556	1	0.000508347
																																							KZV	1	0.0024243	55B	1	0.000508347
																																							KZG	1	0.0024243	55G	1	0.000508347
																																							KZ7	1	0.0024243	55H	1	0.000508347
																																							KZ4	1	0.0024243	3JQ	1	0.000508347
																																							KYK	1	0.0024243	568	1	0.000508347
																																							KY5	1	0.0024243	3IP	1	0.000508347
																																							KY4	1	0.0024243	3IO	1	0.000508347
																																							KXV	1	0.0024243	56D	1	0.000508347
																																							KWY	1	0.0024243	57J	1	0.000508347
																																							KWQ	1	0.0024243	57L	1	0.000508347
																																							KWH	1	0.0024243	57O	1	0.000508347
																																							KTZ	1	0.0024243	3IB	1	0.000508347
																																							KRW	1	0.0024243	593	1	0.000508347
																																							KPV	1	0.0024243	5ID	1	0.000508347
																																							KPJ	1	0.0024243	5JU	1	0.000508347
																																							KP2	1	0.0024243	3L4	1	0.000508347
																																							KNS	1	0.0024243	5TA	1	0.000508347
																																							KND	1	0.0024243	36A	1	0.000508347
																																							KMV	1	0.0024243	5UL	1	0.000508347
																																							KMM	1	0.0024243	35M	1	0.000508347
																																							KMJ	1	0.0024243	5UO	1	0.000508347
																																							KMD	1	0.0024243	5UT	1	0.000508347
																																							KM7	1	0.0024243	5WB	1	0.000508347
																																							JHK	1	0.0024243	5WL	1	0.000508347
																																							JFZ	1	0.0024243	5XN	1	0.000508347
																																							H54	1	0.0024243	61P	1	0.000508347
																																							I92	1	0.0024243	63C	1	0.000508347
																																							I02	1	0.0024243	63W	1	0.000508347
																																							HZT	1	0.0024243	64J	1	0.000508347
																																							HYW	1	0.0024243	65H	1	0.000508347
																																							HYK	1	0.0024243	65J	1	0.000508347
																																							HY8	1	0.0024243	65N	1	0.000508347
																																							HTT	1	0.0024243	65O	1	0.000508347
																																							HSO	1	0.0024243	65Q	1	0.000508347
																																							HRV	1	0.0024243	663	1	0.000508347
																																							HNZ	1	0.0024243	67O	1	0.000508347
																																							HM3	1	0.0024243	5U8	1	0.000508347
																																							HKL	1	0.0024243	5S7	1	0.000508347
																																							HJN	1	0.0024243	3AM	1	0.000508347
																																							HI3	1	0.0024243	36Y	1	0.000508347
																																							HHV	1	0.0024243	5JV	1	0.000508347
																																							HEA	1	0.0024243	3AB	1	0.000508347
																																							HDX	1	0.0024243	39P	1	0.000508347
																																							HD2	1	0.0024243	5M8	1	0.000508347
																																							HBX	1	0.0024243	39B	1	0.000508347
																																							HBP	1	0.0024243	38H	1	0.000508347
																																							HBI	1	0.0024243	387	1	0.000508347
																																							HBA	1	0.0024243	5N1	1	0.000508347
																																							HA5	1	0.0024243	385	1	0.000508347
																																							H7T	1	0.0024243	384	1	0.000508347
																																							H7Q	1	0.0024243	37L	1	0.000508347
																																							H6M	1	0.0024243	37K	1	0.000508347
																																							H5G	1	0.0024243	5NJ	1	0.000508347
																																							H5D	1	0.0024243	5O2	1	0.000508347
																																							I2C	1	0.0024243	5OB	1	0.000508347
																																							IAA	1	0.0024243	5OQ	1	0.000508347
																																							JF5	1	0.0024243	5QJ	1	0.000508347
																																							IAV	1	0.0024243	5R6	1	0.000508347
																																							JCQ	1	0.0024243	376	1	0.000508347
																																							JCD	1	0.0024243	3KA	1	0.000508347
																																							JC5	1	0.0024243	3L5	1	0.000508347
																																							JBJ	1	0.0024243	67T	1	0.000508347
																																							JB9	1	0.0024243	415	1	0.000508347
																																							J8N	1	0.0024243	40L	1	0.000508347
																																							J4V	1	0.0024243	4BF	1	0.000508347
																																							J4S	1	0.0024243	3Y0	1	0.000508347
																																							J34	1	0.0024243	4BH	1	0.000508347
																																							J2D	1	0.0024243	3XW	1	0.000508347
																																							J1V	1	0.0024243	3XF	1	0.000508347
																																							J1Q	1	0.0024243	3XE	1	0.000508347
																																							J0Y	1	0.0024243	3XD	1	0.000508347
																																							J0T	1	0.0024243	4BQ	1	0.000508347
																																							IYR	1	0.0024243	3XC	1	0.000508347
																																							IQW	1	0.0024243	3XB	1	0.000508347
																																							IPH	1	0.0024243	4CD	1	0.000508347
																																							IOY	1	0.0024243	4CH	1	0.000508347
																																							INW	1	0.0024243	3XA	1	0.000508347
																																							INR	1	0.0024243	3VR	1	0.000508347
																																							INO	1	0.0024243	4DJ	1	0.000508347
																																							IMP	1	0.0024243	4DK	1	0.000508347
																																							IK4	1	0.0024243	3US	1	0.000508347
																																							IGP	1	0.0024243	4DL	1	0.000508347
																																							IDD	1	0.0024243	413	1	0.000508347
																																							IDC	1	0.0024243	41G	1	0.000508347
																																							IBZ	1	0.0024243	4DO	1	0.000508347
																																							008	1	0.0024243	4AW	1	0.000508347
																																										43N	1	0.000508347
																																										439	1	0.000508347
																																										445	1	0.000508347
																																										44V	1	0.000508347
																																										44W	1	0.000508347
																																										455	1	0.000508347
																																										46L	1	0.000508347
																																										46S	1	0.000508347
																																										42Z	1	0.000508347
																																										47P	1	0.000508347
																																										47U	1	0.000508347
																																										47V	1	0.000508347
																																										42Q	1	0.000508347
																																										489	1	0.000508347
																																										421	1	0.000508347
																																										48Q	1	0.000508347
																																										499	1	0.000508347
																																										49G	1	0.000508347
																																										4AP	1	0.000508347
																																										4DN	1	0.000508347
																																										4DQ	1	0.000508347
																																										3L7	1	0.000508347
																																										4O4	1	0.000508347
																																										4T1	1	0.000508347
																																										4UO	1	0.000508347
																																										3RA	1	0.000508347
																																										4UT	1	0.000508347
																																										3QA	1	0.000508347
																																										4V7	1	0.000508347
																																										4VD	1	0.000508347
																																										3Q2	1	0.000508347
																																										4VO	1	0.000508347
																																										4WN	1	0.000508347
																																										4X2	1	0.000508347
																																										4X8	1	0.000508347
																																										3NY	1	0.000508347
																																										3NF	1	0.000508347
																																										50Q	1	0.000508347
																																										3MR	1	0.000508347
																																										523	1	0.000508347
																																										52J	1	0.000508347
																																										3LG	1	0.000508347
																																										4PI	1	0.000508347
																																										3RQ	1	0.000508347
																																										4DT	1	0.000508347
																																										3RR	1	0.000508347
																																										4ET	1	0.000508347
																																										3U2	1	0.000508347
																																										4EU	1	0.000508347
																																										4EV	1	0.000508347
																																										4EZ	1	0.000508347
																																										3TZ	1	0.000508347
																																										3TU	1	0.000508347
																																										4F0	1	0.000508347
																																										4FW	1	0.000508347
																																										3TQ	1	0.000508347
																																										4HP	1	0.000508347
																																										3TO	1	0.000508347
																																										3TC	1	0.000508347
																																										4KT	1	0.000508347
																																										4MB	1	0.000508347
																																										4MC	1	0.000508347
																																										3RU	1	0.000508347
																																										4NR	1	0.000508347
																																										3RS	1	0.000508347
																																										34U	1	0.000508347
																																										684	1	0.000508347
																																										7ZJ	1	0.000508347
																																										77E	1	0.000508347
																																										77S	1	0.000508347
																																										78U	1	0.000508347
																																										2KU	1	0.000508347
																																										7A0	1	0.000508347
																																										2KA	1	0.000508347
																																										7A1	1	0.000508347
																																										7A6	1	0.000508347
																																										7B9	1	0.000508347
																																										7C5	1	0.000508347
																																										7D6	1	0.000508347
																																										7DR	1	0.000508347
																																										7DV	1	0.000508347
																																										7F7	1	0.000508347
																																										7F9	1	0.000508347
																																										2K4	1	0.000508347
																																										7FX	1	0.000508347
																																										7GQ	1	0.000508347
																																										2K1	1	0.000508347
																																										2IK	1	0.000508347
																																										2L1	1	0.000508347
																																										76S	1	0.000508347
																																										7GX	1	0.000508347
																																										76B	1	0.000508347
																																										6UY	1	0.000508347
																																										6Z1	1	0.000508347
																																										709	1	0.000508347
																																										70A	1	0.000508347
																																										70K	1	0.000508347
																																										70M	1	0.000508347
																																										70O	1	0.000508347
																																										70Z	1	0.000508347
																																										2MQ	1	0.000508347
																																										720	1	0.000508347
																																										2MD	1	0.000508347
																																										2LM	1	0.000508347
																																										72C	1	0.000508347
																																										2L5	1	0.000508347
																																										2L2	1	0.000508347
																																										72O	1	0.000508347
																																										731	1	0.000508347
																																										73J	1	0.000508347
																																										73Y	1	0.000508347
																																										7GS	1	0.000508347
																																										7HF	1	0.000508347
																																										2MZ	1	0.000508347
																																										7TR	1	0.000508347
																																										7TS	1	0.000508347
																																										7W1	1	0.000508347
																																										2E1	1	0.000508347
																																										7WA	1	0.000508347
																																										2DD	1	0.000508347
																																										7WG	1	0.000508347
																																										2D7	1	0.000508347
																																										7WH	1	0.000508347
																																										7X4	1	0.000508347
																																										7X7	1	0.000508347
																																										2D4	1	0.000508347
																																										7XY	1	0.000508347
																																										2CQ	1	0.000508347
																																										2C5	1	0.000508347
																																										2B9	1	0.000508347
																																										7Z3	1	0.000508347
																																										7Z9	1	0.000508347
																																										2B1	1	0.000508347
																																										7ZA	1	0.000508347
																																										2EL	1	0.000508347
																																										7TP	1	0.000508347
																																										2HK	1	0.000508347
																																										7TO	1	0.000508347
																																										7HP	1	0.000508347
																																										2HJ	1	0.000508347
																																										7IP	1	0.000508347
																																										7KQ	1	0.000508347
																																										7KR	1	0.000508347
																																										7KS	1	0.000508347
																																										7KZ	1	0.000508347
																																										2GG	1	0.000508347
																																										2GE	1	0.000508347
																																										7L6	1	0.000508347
																																										2FY	1	0.000508347
																																										7ME	1	0.000508347
																																										7O3	1	0.000508347
																																										7PQ	1	0.000508347
																																										7S9	1	0.000508347
																																										2EZ	1	0.000508347
																																										7SP	1	0.000508347
																																										7TM	1	0.000508347
																																										2EY	1	0.000508347
																																										6UE	1	0.000508347
																																										2N6	1	0.000508347
																																										68J	1	0.000508347
																																										2YV	1	0.000508347
																																										6FW	1	0.000508347
																																										6FX	1	0.000508347
																																										2Y8	1	0.000508347
																																										6G7	1	0.000508347
																																										2Y1	1	0.000508347
																																										6GU	1	0.000508347
																																										6GV	1	0.000508347
																																										6GW	1	0.000508347
																																										2Y0	1	0.000508347
																																										6HL	1	0.000508347
																																										2XQ	1	0.000508347
																																										6J7	1	0.000508347
																																										6J9	1	0.000508347
																																										6JP	1	0.000508347
																																										6KT	1	0.000508347
																																										6LJ	1	0.000508347
																																										6LZ	1	0.000508347
																																										6M8	1	0.000508347
																																										2VK	1	0.000508347
																																										2YM	1	0.000508347
																																										6F3	1	0.000508347
																																										2UJ	1	0.000508347
																																										2YW	1	0.000508347
																																										68K	1	0.000508347
																																										34H	1	0.000508347
																																										34B	1	0.000508347
																																										68M	1	0.000508347
																																										344	1	0.000508347
																																										33P	1	0.000508347
																																										33N	1	0.000508347
																																										33M	1	0.000508347
																																										69Q	1	0.000508347
																																										6BS	1	0.000508347
																																										6CX	1	0.000508347
																																										6DD	1	0.000508347
																																										6DL	1	0.000508347
																																										31I	1	0.000508347
																																										6DY	1	0.000508347
																																										2ZM	1	0.000508347
																																										6DZ	1	0.000508347
																																										2YY	1	0.000508347
																																										2YX	1	0.000508347
																																										2UK	1	0.000508347
																																										6ME	1	0.000508347
																																										6U4	1	0.000508347
																																										2OD	1	0.000508347
																																										2O6	1	0.000508347
																																										6P4	1	0.000508347
																																										2O1	1	0.000508347
																																										2O0	1	0.000508347
																																										2NZ	1	0.000508347
																																										2NY	1	0.000508347
																																										6P5	1	0.000508347
																																										6PM	1	0.000508347
																																										6PS	1	0.000508347
																																										6Q3	1	0.000508347
																																										2NW	1	0.000508347
																																										6QM	1	0.000508347
																																										6RQ	1	0.000508347
																																										2NB	1	0.000508347
																																										6SO	1	0.000508347
																																										6TA	1	0.000508347
																																										6TN	1	0.000508347
																																										6TZ	1	0.000508347
																																										2N9	1	0.000508347
																																										6P1	1	0.000508347
																																										2ON	1	0.000508347
																																										2UH	1	0.000508347
																																										2P1	1	0.000508347
																																										6MM	1	0.000508347
																																										6MQ	1	0.000508347
																																										2TJ	1	0.000508347
																																										2SF	1	0.000508347
																																										6N4	1	0.000508347
																																										6N8	1	0.000508347
																																										6NF	1	0.000508347
																																										2SE	1	0.000508347
																																										6NM	1	0.000508347
																																										2S9	1	0.000508347
																																										6NZ	1	0.000508347
																																										6O2	1	0.000508347
																																										2S7	1	0.000508347
																																										2S6	1	0.000508347
																																										6OK	1	0.000508347
																																										6OW	1	0.000508347
																																										2RM	1	0.000508347
																																										2QK	1	0.000508347
																																										2QG	1	0.000508347
																																										52V	1	0.000508347
																																										ZZN	1	0.000508347
																																										BD0	1	0.000508347
																																										P43	1	0.000508347
																																										OWS	1	0.000508347
																																										OWV	1	0.000508347
																																										OWW	1	0.000508347
																																										OXN	1	0.000508347
																																										OXT	1	0.000508347
																																										OYJ	1	0.000508347
																																										OZY	1	0.000508347
																																										P1T	1	0.000508347
																																										P2F	1	0.000508347
																																										P3B	1	0.000508347
																																										P3F	1	0.000508347
																																										P46	1	0.000508347
																																										OWM	1	0.000508347
																																										P4A	1	0.000508347
																																										P60	1	0.000508347
																																										P71	1	0.000508347
																																										P89	1	0.000508347
																																										PAB	1	0.000508347
																																										PAQ	1	0.000508347
																																										PB9	1	0.000508347
																																										PBG	1	0.000508347
																																										PCG	1	0.000508347
																																										PD8	1	0.000508347
																																										PF3	1	0.000508347
																																										OWP	1	0.000508347
																																										OWJ	1	0.000508347
																																										PFM	1	0.000508347
																																										OCH	1	0.000508347
																																										NTZ	1	0.000508347
																																										NU1	1	0.000508347
																																										NY2	1	0.000508347
																																										O01	1	0.000508347
																																										O19	1	0.000508347
																																										O1G	1	0.000508347
																																										O2H	1	0.000508347
																																										O2K	1	0.000508347
																																										O35	1	0.000508347
																																										O71	1	0.000508347
																																										OA2	1	0.000508347
																																										OE1	1	0.000508347
																																										OWG	1	0.000508347
																																										OE4	1	0.000508347
																																										OFM	1	0.000508347
																																										OHD	1	0.000508347
																																										OHH	1	0.000508347
																																										OHU	1	0.000508347
																																										OJ7	1	0.000508347
																																										OMR	1	0.000508347
																																										ONC	1	0.000508347
																																										ORO	1	0.000508347
																																										OTY	1	0.000508347
																																										OW8	1	0.000508347
																																										PFF	1	0.000508347
																																										PGS	1	0.000508347
																																										NSC	1	0.000508347
																																										Q20	1	0.000508347
																																										PYD	1	0.000508347
																																										PYI	1	0.000508347
																																										PYU	1	0.000508347
																																										PZ3	1	0.000508347
																																										PZP	1	0.000508347
																																										Q0J	1	0.000508347
																																										Q0K	1	0.000508347
																																										Q0P	1	0.000508347
																																										Q12	1	0.000508347
																																										Q19	1	0.000508347
																																										Q1Y	1	0.000508347
																																										Q22	1	0.000508347
																																										PY7	1	0.000508347
																																										Q26	1	0.000508347
																																										Q27	1	0.000508347
																																										Q3A	1	0.000508347
																																										Q4A	1	0.000508347
																																										Q4Q	1	0.000508347
																																										Q5A	1	0.000508347
																																										Q67	1	0.000508347
																																										Q88	1	0.000508347
																																										QDR	1	0.000508347
																																										QF2	1	0.000508347
																																										QFG	1	0.000508347
																																										PY9	1	0.000508347
																																										PY6	1	0.000508347
																																										PHN	1	0.000508347
																																										PR1	1	0.000508347
																																										PIM	1	0.000508347
																																										PK3	1	0.000508347
																																										PL5	1	0.000508347
																																										PL8	1	0.000508347
																																										PLB	1	0.000508347
																																										PM2	1	0.000508347
																																										PMD	1	0.000508347
																																										PMO	1	0.000508347
																																										PMS	1	0.000508347
																																										PNM	1	0.000508347
																																										PQD	1	0.000508347
																																										PRD	1	0.000508347
																																										PY4	1	0.000508347
																																										PRQ	1	0.000508347
																																										PT1	1	0.000508347
																																										PTE	1	0.000508347
																																										PTT	1	0.000508347
																																										PV0	1	0.000508347
																																										PV1	1	0.000508347
																																										PV2	1	0.000508347
																																										PV8	1	0.000508347
																																										PVG	1	0.000508347
																																										PXP	1	0.000508347
																																										PY3	1	0.000508347
																																										NSJ	1	0.000508347
																																										NRS	1	0.000508347
																																										QH4	1	0.000508347
																																										M74	1	0.000508347
																																										M1W	1	0.000508347
																																										M1X	1	0.000508347
																																										M23	1	0.000508347
																																										M3Z	1	0.000508347
																																										M4K	1	0.000508347
																																										M4N	1	0.000508347
																																										M5K	1	0.000508347
																																										M61	1	0.000508347
																																										M68	1	0.000508347
																																										M6Z	1	0.000508347
																																										M72	1	0.000508347
																																										M7D	1	0.000508347
																																										LZR	1	0.000508347
																																										M91	1	0.000508347
																																										MA7	1	0.000508347
																																										MAQ	1	0.000508347
																																										MBM	1	0.000508347
																																										MCT	1	0.000508347
																																										MD6	1	0.000508347
																																										ME6	1	0.000508347
																																										MEJ	1	0.000508347
																																										MEX	1	0.000508347
																																										MEY	1	0.000508347
																																										MFR	1	0.000508347
																																										M03	1	0.000508347
																																										LZL	1	0.000508347
																																										MHB	1	0.000508347
																																										LSW	1	0.000508347
																																										LG4	1	0.000508347
																																										LG5	1	0.000508347
																																										LHB	1	0.000508347
																																										LHF	1	0.000508347
																																										LIH	1	0.000508347
																																										LII	1	0.000508347
																																										LJV	1	0.000508347
																																										LKT	1	0.000508347
																																										LL1	1	0.000508347
																																										LLF	1	0.000508347
																																										LPI	1	0.000508347
																																										LTN	1	0.000508347
																																										LZK	1	0.000508347
																																										LTS	1	0.000508347
																																										LTT	1	0.000508347
																																										LUH	1	0.000508347
																																										LUK	1	0.000508347
																																										LWH	1	0.000508347
																																										LWW	1	0.000508347
																																										LY3	1	0.000508347
																																										LY4	1	0.000508347
																																										LYB	1	0.000508347
																																										LZ1	1	0.000508347
																																										LZ8	1	0.000508347
																																										MG9	1	0.000508347
																																										MHF	1	0.000508347
																																										NRQ	1	0.000508347
																																										NDV	1	0.000508347
																																										N64	1	0.000508347
																																										N67	1	0.000508347
																																										N6J	1	0.000508347
																																										N71	1	0.000508347
																																										N87	1	0.000508347
																																										N91	1	0.000508347
																																										N9D	1	0.000508347
																																										NAB	1	0.000508347
																																										NAQ	1	0.000508347
																																										NCT	1	0.000508347
																																										NDC	1	0.000508347
																																										NFZ	1	0.000508347
																																										N4M	1	0.000508347
																																										NH6	1	0.000508347
																																										NH7	1	0.000508347
																																										NHL	1	0.000508347
																																										NIR	1	0.000508347
																																										NLD	1	0.000508347
																																										NM1	1	0.000508347
																																										NMB	1	0.000508347
																																										NMW	1	0.000508347
																																										NN8	1	0.000508347
																																										NOV	1	0.000508347
																																										NPY	1	0.000508347
																																										N5S	1	0.000508347
																																										N3P	1	0.000508347
																																										MHR	1	0.000508347
																																										MPI	1	0.000508347
																																										MIM	1	0.000508347
																																										MJU	1	0.000508347
																																										MKP	1	0.000508347
																																										MKS	1	0.000508347
																																										MKU	1	0.000508347
																																										MKW	1	0.000508347
																																										MKZ	1	0.000508347
																																										MMM	1	0.000508347
																																										MNI	1	0.000508347
																																										MOB	1	0.000508347
																																										MOT	1	0.000508347
																																										MPM	1	0.000508347
																																										N37	1	0.000508347
																																										MQM	1	0.000508347
																																										MQN	1	0.000508347
																																										MT6	1	0.000508347
																																										MTB	1	0.000508347
																																										MTP	1	0.000508347
																																										MUT	1	0.000508347
																																										MY6	1	0.000508347
																																										MYC	1	0.000508347
																																										MZ6	1	0.000508347
																																										N08	1	0.000508347
																																										N1N	1	0.000508347
																																										QGE	1	0.000508347
																																										QKJ	1	0.000508347
																																										LDN	1	0.000508347
																																										VOR	1	0.000508347
																																										V0J	1	0.000508347
																																										V15	1	0.000508347
																																										V68	1	0.000508347
																																										VBN	1	0.000508347
																																										VC3	1	0.000508347
																																										VGB	1	0.000508347
																																										VGH	1	0.000508347
																																										VHD	1	0.000508347
																																										VHS	1	0.000508347
																																										VKS	1	0.000508347
																																										VMP	1	0.000508347
																																										VRZ	1	0.000508347
																																										UWB	1	0.000508347
																																										VVX	1	0.000508347
																																										VWY	1	0.000508347
																																										W2D	1	0.000508347
																																										W30	1	0.000508347
																																										WBU	1	0.000508347
																																										WH4	1	0.000508347
																																										WMR	1	0.000508347
																																										WOS	1	0.000508347
																																										WPH	1	0.000508347
																																										WY1	1	0.000508347
																																										X0B	1	0.000508347
																																										UXG	1	0.000508347
																																										UWA	1	0.000508347
																																										X17	1	0.000508347
																																										UFT	1	0.000508347
																																										U0P	1	0.000508347
																																										U4Y	1	0.000508347
																																										U75	1	0.000508347
																																										UA4	1	0.000508347
																																										UAN	1	0.000508347
																																										UC9	1	0.000508347
																																										UD0	1	0.000508347
																																										UD4	1	0.000508347
																																										UDX	1	0.000508347
																																										UEN	1	0.000508347
																																										UEY	1	0.000508347
																																										UHB	1	0.000508347
																																										UW9	1	0.000508347
																																										UI2	1	0.000508347
																																										UIH	1	0.000508347
																																										ULP	1	0.000508347
																																										UNU	1	0.000508347
																																										UP6	1	0.000508347
																																										UPA	1	0.000508347
																																										UPG	1	0.000508347
																																										UPX	1	0.000508347
																																										URI	1	0.000508347
																																										URO	1	0.000508347
																																										UW3	1	0.000508347
																																										X0V	1	0.000508347
																																										X29	1	0.000508347
																																										TYM	1	0.000508347
																																										Z64	1	0.000508347
																																										YKI	1	0.000508347
																																										YKJ	1	0.000508347
																																										YMP	1	0.000508347
																																										YOF	1	0.000508347
																																										YTA	1	0.000508347
																																										YU7	1	0.000508347
																																										YXR	1	0.000508347
																																										Z04	1	0.000508347
																																										Z0M	1	0.000508347
																																										Z14	1	0.000508347
																																										Z3R	1	0.000508347
																																										Z81	1	0.000508347
																																										YKC	1	0.000508347
																																										ZEA	1	0.000508347
																																										ZID	1	0.000508347
																																										ZIP	1	0.000508347
																																										ZOL	1	0.000508347
																																										ZP1	1	0.000508347
																																										ZS0	1	0.000508347
																																										ZVY	1	0.000508347
																																										ZX7	1	0.000508347
																																										ZY5	1	0.000508347
																																										ZZ3	1	0.000508347
																																										ZZ4	1	0.000508347
																																										YKE	1	0.000508347
																																										YJW	1	0.000508347
																																										X2E	1	0.000508347
																																										XJX	1	0.000508347
																																										X48	1	0.000508347
																																										X63	1	0.000508347
																																										X9F	1	0.000508347
																																										XAM	1	0.000508347
																																										XBV	1	0.000508347
																																										XCF	1	0.000508347
																																										XFH	1	0.000508347
																																										XFL	1	0.000508347
																																										XHP	1	0.000508347
																																										XIM	1	0.000508347
																																										XJG	1	0.000508347
																																										XKL	1	0.000508347
																																										YI5	1	0.000508347
																																										XLD	1	0.000508347
																																										XP0	1	0.000508347
																																										XQ0	1	0.000508347
																																										XQG	1	0.000508347
																																										XQI	1	0.000508347
																																										XRA	1	0.000508347
																																										Y2B	1	0.000508347
																																										Y2F	1	0.000508347
																																										Y9Z	1	0.000508347
																																										YF2	1	0.000508347
																																										YI0	1	0.000508347
																																										TYS	1	0.000508347
																																										TV2	1	0.000508347
																																										QL8	1	0.000508347
																																										S1S	1	0.000508347
																																										RPF	1	0.000508347
																																										RPR	1	0.000508347
																																										RQD	1	0.000508347
																																										RR8	1	0.000508347
																																										RSV	1	0.000508347
																																										RUI	1	0.000508347
																																										RY4	1	0.000508347
																																										RYG	1	0.000508347
																																										S0D	1	0.000508347
																																										S0G	1	0.000508347
																																										S0L	1	0.000508347
																																										S20	1	0.000508347
																																										ROJ	1	0.000508347
																																										S24	1	0.000508347
																																										S2I	1	0.000508347
																																										S2X	1	0.000508347
																																										S36	1	0.000508347
																																										S3O	1	0.000508347
																																										S42	1	0.000508347
																																										S46	1	0.000508347
																																										S60	1	0.000508347
																																										S76	1	0.000508347
																																										S77	1	0.000508347
																																										S84	1	0.000508347
																																										RPB	1	0.000508347
																																										ROA	1	0.000508347
																																										S97	1	0.000508347
																																										R11	1	0.000508347
																																										QLP	1	0.000508347
																																										QLQ	1	0.000508347
																																										QLZ	1	0.000508347
																																										QP4	1	0.000508347
																																										QQJ	1	0.000508347
																																										QQQ	1	0.000508347
																																										QSI	1	0.000508347
																																										QSP	1	0.000508347
																																										QUD	1	0.000508347
																																										QUG	1	0.000508347
																																										QUO	1	0.000508347
																																										RA0	1	0.000508347
																																										RMD	1	0.000508347
																																										RAB	1	0.000508347
																																										RB4	1	0.000508347
																																										RB9	1	0.000508347
																																										RDR	1	0.000508347
																																										RE4	1	0.000508347
																																										RGT	1	0.000508347
																																										RJE	1	0.000508347
																																										RJP	1	0.000508347
																																										RL1	1	0.000508347
																																										RL3	1	0.000508347
																																										RM7	1	0.000508347
																																										S90	1	0.000508347
																																										S98	1	0.000508347
																																										TTJ	1	0.000508347
																																										TEP	1	0.000508347
																																										T87	1	0.000508347
																																										T9G	1	0.000508347
																																										TA2	1	0.000508347
																																										TAB	1	0.000508347
																																										TAL	1	0.000508347
																																										TD7	1	0.000508347
																																										TD8	1	0.000508347
																																										TD9	1	0.000508347
																																										TDL	1	0.000508347
																																										TDR	1	0.000508347
																																										TDW	1	0.000508347
																																										TGQ	1	0.000508347
																																										T62	1	0.000508347
																																										TLL	1	0.000508347
																																										TMF	1	0.000508347
																																										TMP	1	0.000508347
																																										TOG	1	0.000508347
																																										TP8	1	0.000508347
																																										TPT	1	0.000508347
																																										TQD	1	0.000508347
																																										TQL	1	0.000508347
																																										TRN	1	0.000508347
																																										TSJ	1	0.000508347
																																										TSS	1	0.000508347
																																										T6J	1	0.000508347
																																										T5Y	1	0.000508347
																																										SA8	1	0.000508347
																																										SWD	1	0.000508347
																																										SK2	1	0.000508347
																																										SK6	1	0.000508347
																																										SMX	1	0.000508347
																																										SR2	1	0.000508347
																																										SS3	1	0.000508347
																																										SS7	1	0.000508347
																																										SSU	1	0.000508347
																																										STI	1	0.000508347
																																										SUY	1	0.000508347
																																										SV2	1	0.000508347
																																										SW2	1	0.000508347
																																										SX0	1	0.000508347
																																										T5K	1	0.000508347
																																										SY9	1	0.000508347
																																										SYA	1	0.000508347
																																										SYN	1	0.000508347
																																										SYR	1	0.000508347
																																										SZC	1	0.000508347
																																										T0V	1	0.000508347
																																										T1J	1	0.000508347
																																										T21	1	0.000508347
																																										T3P	1	0.000508347
																																										T44	1	0.000508347
																																										T5J	1	0.000508347
																																										LFK	1	0.000508347
																																										LBM	1	0.000508347
																																										BD3	1	0.000508347
																																										E48	1	0.000508347
																																										DTM	1	0.000508347
																																										DTR	1	0.000508347
																																										DVP	1	0.000508347
																																										DWA	1	0.000508347
																																										DWT	1	0.000508347
																																										DX4	1	0.000508347
																																										DX6	1	0.000508347
																																										DXW	1	0.000508347
																																										DY8	1	0.000508347
																																										DYY	1	0.000508347
																																										E42	1	0.000508347
																																										E4E	1	0.000508347
																																										DSH	1	0.000508347
																																										E6T	1	0.000508347
																																										E72	1	0.000508347
																																										E9U	1	0.000508347
																																										EA5	1	0.000508347
																																										EAQ	1	0.000508347
																																										EB4	1	0.000508347
																																										EBB	1	0.000508347
																																										ED1	1	0.000508347
																																										ED4	1	0.000508347
																																										ED7	1	0.000508347
																																										EFT	1	0.000508347
																																										DT8	1	0.000508347
																																										DQH	1	0.000508347
																																										EGR	1	0.000508347
																																										DGB	1	0.000508347
																																										D92	1	0.000508347
																																										D93	1	0.000508347
																																										DA1	1	0.000508347
																																										DBG	1	0.000508347
																																										DCM	1	0.000508347
																																										DD1	1	0.000508347
																																										DD2	1	0.000508347
																																										DF7	1	0.000508347
																																										DF9	1	0.000508347
																																										DFA	1	0.000508347
																																										DG3	1	0.000508347
																																										DHB	1	0.000508347
																																										DQF	1	0.000508347
																																										DHI	1	0.000508347
																																										DJK	1	0.000508347
																																										DL1	1	0.000508347
																																										DMB	1	0.000508347
																																										DN4	1	0.000508347
																																										DN9	1	0.000508347
																																										DPZ	1	0.000508347
																																										DQ0	1	0.000508347
																																										DQ1	1	0.000508347
																																										DQ3	1	0.000508347
																																										DQ9	1	0.000508347
																																										EFU	1	0.000508347
																																										EI8	1	0.000508347
																																										D8Y	1	0.000508347
																																										F6F	1	0.000508347
																																										F0B	1	0.000508347
																																										F0N	1	0.000508347
																																										F0P	1	0.000508347
																																										F18	1	0.000508347
																																										F1L	1	0.000508347
																																										F2Y	1	0.000508347
																																										F3E	1	0.000508347
																																										F42	1	0.000508347
																																										F59	1	0.000508347
																																										F63	1	0.000508347
																																										F6D	1	0.000508347
																																										F8B	1	0.000508347
																																										EZV	1	0.000508347
																																										F8H	1	0.000508347
																																										F8Z	1	0.000508347
																																										FA5	1	0.000508347
																																										FBD	1	0.000508347
																																										FCW	1	0.000508347
																																										FDB	1	0.000508347
																																										FFG	1	0.000508347
																																										FGD	1	0.000508347
																																										FHJ	1	0.000508347
																																										FJ2	1	0.000508347
																																										FJ3	1	0.000508347
																																										F02	1	0.000508347
																																										EZ2	1	0.000508347
																																										ZZC	1	0.000508347
																																										EST	1	0.000508347
																																										EJ1	1	0.000508347
																																										EKB	1	0.000508347
																																										EML	1	0.000508347
																																										ENO	1	0.000508347
																																										ENQ	1	0.000508347
																																										ENS	1	0.000508347
																																										ENZ	1	0.000508347
																																										EPC	1	0.000508347
																																										EQT	1	0.000508347
																																										EQU	1	0.000508347
																																										ES4	1	0.000508347
																																										ET	1	0.000508347
																																										EYQ	1	0.000508347
																																										EUE	1	0.000508347
																																										EUH	1	0.000508347
																																										EV0	1	0.000508347
																																										EV2	1	0.000508347
																																										EVM	1	0.000508347
																																										EVW	1	0.000508347
																																										EVZ	1	0.000508347
																																										EWE	1	0.000508347
																																										EWT	1	0.000508347
																																										EX7	1	0.000508347
																																										EXB	1	0.000508347
																																										D91	1	0.000508347
																																										D8H	1	0.000508347
																																										FJ5	1	0.000508347
																																										C1Y	1	0.000508347
																																										BVG	1	0.000508347
																																										BVX	1	0.000508347
																																										BW1	1	0.000508347
																																										BYC	1	0.000508347
																																										BYZ	1	0.000508347
																																										BZ8	1	0.000508347
																																										BZD	1	0.000508347
																																										BZS	1	0.000508347
																																										C07	1	0.000508347
																																										C09	1	0.000508347
																																										C1Q	1	0.000508347
																																										C1Z	1	0.000508347
																																										BV0	1	0.000508347
																																										C2D	1	0.000508347
																																										C3Z	1	0.000508347
																																										C4K	1	0.000508347
																																										C4N	1	0.000508347
																																										C4T	1	0.000508347
																																										C52	1	0.000508347
[truncated: 314 more rows]
[truncated: 22 more columns]

## Sheet: ringType
	i						ii						iii						iv						v						vi						vii						rest
	A		B		C		A		B		C		A		B		C		A		B		C		A		B		C		A		B		C		A		B		C		A		B		C
Ring type	counts	%	counts	%	counts	%	counts	%	counts	%	counts	%	counts	%	counts	%	counts	%	counts	%	counts	%	counts	%	counts	%	counts	%	counts	%	counts	%	counts	%	counts	%	counts	%	counts	%	counts	%	counts	%	counts	%	counts	%
RNA	36	6.62983	45	2.66272	131	3.09035	9	3.96476	11	0.604728	24	0.349752	20	1.23609	34	0.713836	200	0.517344	115	13.7395	109	7.53804	318	6.53112	130	0.839197	151	0.366069	471	0.239431	149	60.8163	93	18.3794	618	19.5942	11	2.01835	6	0.433526	3	0.0661521	894	5.4218	930	2.31062	2236	3.21255
DNA	0	0	16	0.946746	3	0.0707714	0	0	5	0.274876	7	0.102011	2	0.123609	3	0.0629855	96	0.248325	8	0.955795	26	1.79806	21	0.4313	15	0.0968304	67	0.162428	236	0.11997	5	2.04082	40	7.90514	119	3.77299	0	0	2	0.144509	0	0	69	0.418461	180	0.447216	428	0.614925
protein	457	84.1621	1565	92.6036	4037	95.2347	180	79.2952	1497	82.298	6621	96.4879	1519	93.8813	4497	94.4153	36484	94.3739	471	56.2724	1000	69.1563	3957	81.2693	13739	88.6902	38722	93.8738	189417	96.2896	66	26.9388	288	56.917	1690	53.5828	517	94.8624	1346	97.2543	4417	97.398	14572	88.3741	37667	93.5849	62843	90.2891
other	50	9.2081	64	3.78698	68	1.60415	38	16.7401	306	16.8224	210	3.06033	77	4.75896	229	4.80789	1879	4.86045	243	29.0323	311	21.5076	573	11.7683	1607	10.3738	2309	5.59771	6592	3.35102	25	10.2041	85	16.7984	727	23.0501	17	3.11927	30	2.16763	115	2.53583	954	5.78568	1472	3.65723	4095	5.88345

## Sheet: anionRingPairFreq
i												ii												iii												iv												v
A				B				C				A				B				C				A				B				C				A				B				C				A
Ring	Anion	counts	%	Ring	Anion	counts	%	Ring	Anion	counts	%	Ring	Anion	counts	%	Ring	Anion	counts	%	Ring	Anion	counts	%	Ring	Anion	counts	%	Ring	Anion	counts	%	Ring	Anion	counts	%	Ring	Anion	counts	%	Ring	Anion	counts	%	Ring	Anion	counts	%	Ring	Anion
TRP	ASP	83	15.2855	HIS	ASP	268	15.858	HIS	ASP	595	14.0363	HIS	ASP	117	51.5419	HIS	ASP	676	37.1633	HIS	ASP	2195	31.9878	TYR	ASP	176	10.8776	TYR	GLU	755	15.8514	TYR	GLU	6107	15.7971	HIS	GLU	243	29.0323	HIS	GLU	388	26.8326	HIS	ASP	1591	32.6761	HIS	ASP
HIS	ASP	59	10.8656	HIS	GLU	250	14.7929	HIS	GLU	405	9.55414	HIS	GLU	32	14.0969	HIS	GLU	390	21.4404	HIS	GLU	1551	22.6027	TRP	ASP	176	10.8776	TRP	GLU	602	12.6391	TYR	ASP	5954	15.4013	HIS	ASP	118	14.098	HIS	ASP	366	25.3112	HIS	GLU	1402	28.7944	PHE	ASP
HIS	GLU	52	9.57643	TYR	GLU	152	8.99408	TYR	GLU	317	7.47818	HIS	AZI	7	3.0837	CLA	GLU	62	3.40847	HIS	CL	331	4.82367	TRP	GLU	171	10.5686	PHE	GLU	583	12.2402	HIS	ASP	4637	11.9946	G	A	28	3.34528	HEM	GLU	24	1.65975	HIS	SO4	96	1.97166	HIS	GLU
PHE	GLU	41	7.55064	PHE	ASP	146	8.63905	TYR	ASP	237	5.59094	HIS	SO4	6	2.64317	HIS	PO4	56	3.07861	HIS	ACT	248	3.61411	HIS	ASP	155	9.57973	HIS	GLU	563	11.8203	HIS	GLU	4328	11.1953	HEM	GLU	21	2.50896	TYR	GLU	22	1.52144	G	A	86	1.76628	TYR	ASP
PHE	ASP	38	6.99816	PHE	GLU	123	7.27811	TRP	ASP	183	4.31706	HEC	SO3	5	2.20264	HIS	SO4	51	2.80374	HIS	PO4	203	2.95832	HIS	GLU	142	8.77627	TYR	ASP	433	9.09091	TRP	GLU	2910	7.52735	U	G	19	2.27001	HEM	ASP	21	1.45228	TYR	ASP	75	1.54036	PHE	GLU
TYR	ASP	34	6.26151	TYR	ASP	100	5.91716	PHE	ASP	165	3.89243	CLA	GLU	4	1.76211	HIS	ACT	36	1.97911	HIS	SO4	122	1.77791	PHE	GLU	140	8.65266	HIS	ASP	388	8.14613	TRP	ASP	2313	5.98308	G	G	18	2.15054	PHE	ASP	19	1.31397	TYR	GLU	70	1.43767	TRP	ASP
TRP	GLU	33	6.07735	TRP	ASP	71	4.20118	HIS	PO4	148	3.49139	HEM	SO4	4	1.76211	HIS	CL	24	1.31941	HIS	KCX	120	1.74876	TYR	GLU	136	8.40544	PHE	ASP	355	7.45329	PHE	GLU	1719	4.44657	HIS	SO4	13	1.55317	HIS	SO4	18	1.24481	HIS	DG	60	1.23229	TYR	GLU
TYR	GLU	22	4.05157	TRP	GLU	67	3.9645	TRP	GLU	145	3.42062	HIS	ACT	4	1.76211	PDC	PDC	24	1.31941	HIS	BCT	101	1.47187	PHE	ASP	132	8.15822	TRP	ASP	331	6.9494	PHE	ASP	1416	3.6628	HIS	CL	12	1.43369	TRP	GLU	15	1.03734	HIS	HEM	60	1.23229	TRP	GLU
G	A	8	1.4733	TRP	PQQ	16	0.946746	PHE	GLU	97	2.28828	G	A	3	1.32159	HEM	CYN	18	0.989555	HIS	FMT	70	1.02011	HIS	CL	34	2.10136	TYR	CO3	34	0.713836	HIS	SO4	815	2.10818	U	A	11	1.31422	PHE	GLU	14	0.968188	HIS	CL	55	1.1296	HIS	SO4
G	G	8	1.4733	HIS	NO2	12	0.710059	HIS	ADP	67	1.58056	HIS	ZZ7	3	1.32159	HIS	NO2	14	0.769654	HIS	SIN	69	1.00554	TRP	ACT	16	0.988875	TYR	SO4	33	0.692841	TYR	SO4	408	1.05538	ATP	ASP	11	1.31422	TYR	ASP	14	0.968188	HIS	CIT	48	0.985829	PHE	SO4
TYR	CL	8	1.4733	HIS	ABH	12	0.710059	HIS	SO4	57	1.34466	HEM	SO3	2	0.881057	PQQ	GLU	14	0.769654	HIS	ACY	54	0.786943	TYR	SO4	15	0.92707	TRP	HEM	29	0.60886	HIS	PO4	350	0.905352	HEC	GLU	11	1.31422	HEC	GLU	13	0.899032	G	U	37	0.75991	TYR	SO4
PHE	KCX	6	1.10497	TYR	ACT	10	0.591716	PHE	CYN	51	1.20311	HEA	AZI	2	0.881057	HEM	AZI	10	0.549753	HIS	CO3	47	0.684932	PHE	ACT	15	0.92707	PHE	SO4	22	0.461894	TRP	SO4	289	0.747562	U	U	9	1.07527	G	C	12	0.829876	HIS	HEC	36	0.739372	TYR	FMT
PHE	FMT	6	1.10497	HIS	ACT	10	0.591716	TYR	ACT	48	1.13234	HIS	4LU	2	0.881057	HEM	ACT	8	0.439802	HIS	NO2	44	0.641212	TYR	ACT	14	0.865266	NRQ	GLU	22	0.461894	HIS	HEM	166	0.429395	PBD	GLU	9	1.07527	A	A	12	0.829876	G	G	28	0.575067	PHE	ACT
HIS	CL	5	0.92081	HIS	CL	9	0.532544	HIS	CYN	45	1.06157	HEM	NO2	2	0.881057	HIS	AZI	8	0.439802	HIS	AZI	42	0.612066	TYR	CL	12	0.741656	HIS	SO4	21	0.440899	HIS	CIT	164	0.424222	HEM	SO4	7	0.83632	C	A	11	0.760719	HIS	PO4	26	0.533991	TYR	ACT
NAI	LMR	4	0.736648	G	C	9	0.532544	HIS	ATP	44	1.03798	HEC	PO4	2	0.881057	SRM	SO3	7	0.384827	HIS	AKG	41	0.597493	TRP	SO4	10	0.618047	TYR	FMT	15	0.314928	HIS	CL	148	0.382835	TYR	ASP	7	0.83632	ATP	ASP	11	0.760719	HIS	DA	25	0.513452	HIS	CL
HIS	SO4	4	0.736648	PHE	CL	8	0.473373	HIS	CL	41	0.967209	A	A	2	0.881057	HIS	4LU	7	0.384827	HIS	CIT	35	0.510055	HIS	SO4	9	0.556242	TYR	ACT	14	0.293932	TYR	PO4	131	0.33886	HIS	ACT	7	0.83632	HIS	CL	10	0.691563	UDP	ASP	22	0.451838	TRP	ACT
TYR	PO4	4	0.736648	TYR	CFM	8	0.473373	G	A	30	0.707714	HEM	FMT	2	0.881057	CLA	LHG	7	0.384827	IMD	GLU	32	0.466336	HIS	FMT	7	0.432633	ADP	ASP	13	0.272937	TYR	SEP	124	0.320753	IMD	GLU	7	0.83632	G	G	10	0.691563	GTP	ASP	22	0.451838	TRP	SO4
NAD	ACT	4	0.736648	PHE	XCC	7	0.414201	TYR	PO4	30	0.707714	HEM	ACT	1	0.440529	IKX	IKX	6	0.329852	IMD	ASP	24	0.349752	PHE	FMT	5	0.309023	CR8	GLU	13	0.272937	GDP	ASP	110	0.284539	G	C	6	0.716846	DG	DT	9	0.622407	HIS	DT	21	0.4313	HIS	PO4
PHE	ADP	4	0.736648	TYR	ICS	6	0.35503	HIS	ACT	29	0.684124	HEM	AZI	1	0.440529	HIS	IOD	6	0.329852	HIS	UDP	22	0.320606	PHE	SO4	5	0.309023	HIS	PO4	12	0.251942	HIS	ACT	86	0.222458	CLA	STE	6	0.716846	G	A	9	0.622407	ADP	ASP	20	0.410762	HIS	ACT
NAD	OXL	4	0.736648	TYR	CFN	6	0.35503	HIS	FMT	21	0.4954	SRM	BCT	1	0.440529	HM6	HM6	6	0.329852	HIS	FLC	20	0.29146	TYR	PLG	5	0.309023	TRP	SO4	11	0.230947	PHE	SO4	82	0.212111	CLA	CLA	6	0.716846	TRP	ASP	9	0.622407	PHE	GLU	19	0.390224	FAD	GLU
NAD	PYR	4	0.736648	HIS	S2C	6	0.35503	TYR	CYN	21	0.4954	HEM	CYN	1	0.440529	HIS	PEP	6	0.329852	HIS	CUZ	19	0.276887	PEB	GLU	5	0.309023	TRP	ACT	10	0.209952	TRP	HEM	81	0.209524	HIS	MLI	5	0.597372	C	C	8	0.55325	U	G	19	0.390224	TYR	PO4
TRP	AUC	3	0.552486	TYR	FC6	6	0.35503	HIS	CXS	18	0.424628	HEC	ASP	1	0.440529	HEM	CL	6	0.329852	HIS	TPO	19	0.276887	ADP	GLU	4	0.247219	G	A	8	0.167961	TYR	ACT	76	0.196591	CLA	GLU	5	0.597372	U	G	7	0.484094	HIS	HEA	18	0.369686	TYR	CL
TRP	CL	3	0.552486	HIS	X7A	5	0.295858	TYR	POP	18	0.424628	G	G	1	0.440529	HIS	MLI	6	0.329852	HIS	ILE	18	0.262314	HIS	ACT	4	0.247219	TRP	CL	8	0.167961	NAP	ASP	73	0.188831	CLA	UNL	5	0.597372	HIS	HEM	7	0.484094	HIS	ACT	18	0.369686	PHE	FMT
U	G	3	0.552486	HIS	AZI	5	0.295858	PHE	CL	18	0.424628	G	C	1	0.440529	HIS	BR	5	0.274876	HIS	TLA	17	0.247741	FAD	PYC	4	0.247219	PHE	ACT	8	0.167961	TRP	CL	61	0.15779	HIS	FMT	4	0.477897	HIS	OCS	6	0.414938	HIS	DC	18	0.369686	PHE	CL
U	U	3	0.552486	PHE	ACT	5	0.295858	HIS	KCX	17	0.401038	CLA	LHG	1	0.440529	HIS	FMT	5	0.274876	HIS	ZZ7	17	0.247741	FAD	CL	4	0.247219	GYC	GLU	8	0.167961	HIS	FMT	60	0.155203	A	U	4	0.477897	HIS	ACT	5	0.345781	C	U	18	0.369686	HIS	FMT
MBN	GLU	3	0.552486	HIS	1EC	5	0.295858	G	U	17	0.401038	A	U	1	0.440529	HIS	KCX	5	0.274876	IMD	CL	15	0.218595	HIS	HEM	4	0.247219	CRQ	GLU	7	0.146966	H4B	HEM	55	0.14227	TRP	ASP	4	0.477897	ADP	GLU	5	0.345781	IMD	GLU	18	0.369686	TYR	DA
IMD	GLU	3	0.552486	HIS	SO4	5	0.295858	HIS	AMP	15	0.353857	A	G	1	0.440529	HIS	MET	5	0.274876	HIS	HIS	15	0.218595	C	ASP	4	0.247219	FAD	CL	7	0.146966	TYR	DT	55	0.14227	PHE	ACT	4	0.477897	A	U	5	0.345781	U	A	17	0.349148	ATP	GLU
G	U	3	0.552486	HIS	TPO	5	0.295858	HIS	CIT	14	0.330267	HEC	AZI	1	0.440529	HEM	NO2	4	0.219901	HIS	ABH	14	0.204022	TRP	NO3	4	0.247219	HIS	FMT	7	0.146966	TRP	MET	53	0.137096	CLA	ASP	3	0.358423	A	C	5	0.345781	TRP	ASP	17	0.349148	TRP	FMT
U	A	3	0.552486	TRP	FSO	5	0.295858	TYR	SO4	14	0.330267	HIS	3HA	1	0.440529	HIS	FLC	4	0.219901	HIS	AMP	14	0.204022	HIS	IOD	4	0.247219	HIS	ACT	6	0.125971	TRP	PO4	51	0.131923	HIS	GLY	3	0.358423	HIS	FLC	5	0.345781	C	A	16	0.32861	PHE	DG
TYR	6PG	3	0.552486	A	A	5	0.295858	TYR	BCT	14	0.330267	HEM	PO4	1	0.440529	A	A	4	0.219901	HIS	CYN	14	0.204022	ATP	GLU	4	0.247219	HIS	CIT	6	0.125971	GTP	ASP	47	0.121576	HIS	HEM	3	0.358423	HIS	DC	5	0.345781	PHE	ASP	15	0.308071	PHE	NO3
NAD	CHD	2	0.368324	U	U	5	0.295858	HIS	BEF	14	0.330267	POR	CYN	1	0.440529	KC1	GLU	4	0.219901	HIS	MLI	13	0.189449	TRP	CIT	4	0.247219	HIS	CL	6	0.125971	G	A	43	0.111229	HIS	LYS	3	0.358423	CLA	GLU	5	0.345781	ATP	ASP	15	0.308071	PHE	PO4
PHE	ACT	2	0.368324	PHE	CIT	4	0.236686	HIS	NO2	14	0.330267	HIS	3HB	1	0.440529	HIS	BYN	4	0.219901	HIS	FUM	13	0.189449	HIS	NTM	4	0.247219	TRP	NO3	5	0.104976	DC	GLU	41	0.106056	HIS	NO3	3	0.358423	A	CL	4	0.276625	C	G	14	0.287533	G	A
NAD	ACY	2	0.368324	DG	DPY	4	0.236686	HIS	TLA	13	0.306676	HIS	CL	1	0.440529	HEM	H2S	4	0.219901	HIS	OGA	13	0.189449	TYR	PLS	4	0.247219	TYR	AZI	5	0.104976	TYR	DA	41	0.106056	ATP	GLU	3	0.358423	A	G	4	0.276625	G	C	14	0.287533	TRP	CL
PHE	PO4	2	0.368324	HIS	XCC	4	0.236686	TRP	ACT	13	0.306676	HIS	I83	1	0.440529	MBO	GLU	4	0.219901	HIS	LMR	13	0.189449	TYR	ACY	4	0.247219	TYR	CL	5	0.104976	CYC	ASP	40	0.103469	HEM	FMT	3	0.358423	CLA	CLA	4	0.276625	A	A	11	0.225919	FAD	ASP
PHE	AZI	2	0.368324	HIS	FLC	4	0.236686	HIS	MET	12	0.283086	HIS	ICS	1	0.440529	HEM	BCT	4	0.219901	HIS	MLT	12	0.174876	A	A	4	0.247219	TRP	ARG	4	0.0839807	HIS	ATP	40	0.103469	HEM	ASP	3	0.358423	HIS	HEC	4	0.276625	A	U	11	0.225919	HIS	HEM
PHE	CL	2	0.368324	HIS	TLA	4	0.236686	HIS	CFM	12	0.283086	HIS	MLI	1	0.440529	HIS	ABH	4	0.219901	HIS	LMP	12	0.174876	TYR	PO4	3	0.185414	PHE	FMT	4	0.0839807	NDP	ASP	38	0.0982954	APC	ACT	3	0.358423	ADP	PO4	4	0.276625	MTE	GLU	11	0.225919	TYR	OGA
HIS	PO4	2	0.368324	PHE	FUM	4	0.236686	HIS	A	12	0.283086	HIS	NIG	1	0.440529	HIS	CPT	4	0.219901	HIS	TRP	12	0.174876	TYR	FMT	3	0.185414	C	G	4	0.0839807	GNP	ASP	38	0.0982954	AHN	GLU	3	0.358423	G	CL	4	0.276625	DGT	ASP	11	0.225919	HIS	HCA
A	G	2	0.368324	PHE	GRE	4	0.236686	HIS	APC	12	0.283086	HIS	PNK	1	0.440529	DCJ	DCJ	3	0.164926	HIS	CUK	10	0.14573	TYR	DG	3	0.185414	PHE	DXL	4	0.0839807	TYR	DC	38	0.0982954	C	A	3	0.358423	U	A	4	0.276625	HIS	FMT	10	0.205381	PHE	MLI
NAP	OXL	2	0.368324	TYR	OGA	4	0.236686	NDP	ASP	11	0.259495	HIS	SIN	1	0.440529	HIS	FMN	3	0.164926	HIS	UD2	10	0.14573	TRP	FMT	3	0.185414	NAI	ASP	4	0.0839807	HIS	FLC	37	0.0957086	OLW	GLU	3	0.358423	PQQ	ASP	3	0.207469	HIS	NO3	10	0.205381	TRP	PO4
QVS	QVE	2	0.368324	TRP	CL	4	0.236686	HIS	CRN	11	0.259495	IMD	ASP	1	0.440529	G	C	3	0.164926	HIS	OXL	10	0.14573	TRP	CL	3	0.185414	PHE	CL	4	0.0839807	HIS	DT	36	0.0931219	TYR	GLU	3	0.358423	AD3	ASP	3	0.207469	MTE	ASP	9	0.184843	FMN	ACT
TRP	CYN	2	0.368324	HIS	CTP	4	0.236686	TYR	ACY	11	0.259495	MML	GLU	1	0.440529	HIS	GB	3	0.164926	HIS	BR	10	0.14573	PHE	SIN	3	0.185414	FAD	ASP	4	0.0839807	PHE	DT	35	0.0905352	U	C	3	0.358423	AMP	GLU	3	0.207469	C2E	GLU	9	0.184843	TRP	ACY
TYR	TLA	2	0.368324	HIS	XA2	4	0.236686	G	C	11	0.259495	N8Q	ASP	1	0.440529	HIS	OCS	3	0.164926	HIS	B30	10	0.14573	PHE	NO3	3	0.185414	TYR	DC	4	0.0839807	TRP	ACT	34	0.0879485	1BN	GLU	3	0.358423	ANP	ASP	3	0.207469	TRP	GLU	9	0.184843	FAD	CL
TYR	FMT	2	0.368324	HIS	PO4	4	0.236686	HIS	TPP	11	0.259495	OHI	ASP	1	0.440529	HIS	GG6	3	0.164926	PBD	ASP	9	0.131157	PHE	CL	2	0.123609	HIS	FEC	4	0.0839807	HIS	DG	33	0.0853618	TRP	GLU	3	0.358423	A	PPU	3	0.207469	IMD	ASP	8	0.164305	TRP	MLI
TRP	ACT	2	0.368324	DT	DPY	4	0.236686	HIS	PPK	11	0.259495	OT1	ASP	1	0.440529	HIS	NO3	3	0.164926	HIS	SO3	9	0.131157	TYR	GLY	2	0.123609	HIS	UDP	4	0.0839807	TRP	DC	33	0.0853618	6J0	GLU	2	0.238949	MGD	GLU	3	0.207469	HIS	VAL	7	0.143767	HIS	NO3
58L	AKG	1	0.184162	HIS	GDP	4	0.236686	U	G	11	0.259495	4EY	SO4	1	0.440529	HIS	GRE	3	0.164926	HIS	NO3	9	0.131157	TYR	CGV	2	0.123609	CH6	GLU	3	0.0629855	TYR	UDP	32	0.082775	UTP	ASP	2	0.238949	MVL	GLU	3	0.207469	PTT	ASP	7	0.143767	PHE	ACY
HIS	ACY	1	0.184162	MA7	AKG	4	0.236686	TRP	CL	10	0.235905					HIS	0N8	3	0.164926	HIS	BJ2	9	0.131157	G	A	2	0.123609	PEB	GLU	3	0.0629855	HIS	TLA	32	0.082775	HIS	CIT	2	0.238949	EZ8	GLU	3	0.207469	HIS	LEU	7	0.143767	HIS	PEP
HIS	ABH	1	0.184162	TYR	PO4	4	0.236686	TYR	FCN	9	0.212314					CLA	ASP	3	0.164926	HIS	MX1	8	0.116584	FAD	DMG	2	0.123609	C	ASP	3	0.0629855	C2E	ASP	31	0.0801883	HIS	PO4	2	0.238949	U	C	3	0.207469	HIS	G	7	0.143767	PHE	HEM
TYR	HCT	1	0.184162	HIS	X8A	3	0.177515	TRP	AKG	9	0.212314					HIS	CO3	3	0.164926	HIS	792	8	0.116584	NRQ	ACY	2	0.123609	C	C	3	0.0629855	TYR	DG	31	0.0801883	2MU	U	2	0.238949	PGD	GLU	3	0.207469	U	C	7	0.143767	FMN	SO4
G	GLU	1	0.184162	TRP	KCX	3	0.177515	PHE	BEF	9	0.212314					MML	GLU	3	0.164926	HIS	PC	8	0.116584	PHE	ARG	2	0.123609	PHE	ACY	3	0.0629855	TYR	CL	30	0.0776016	C	G	2	0.238949	864	GLU	3	0.207469	UD1	ASP	7	0.143767	HIS	LYS
TYR	OGA	1	0.184162	TRP	8UX	3	0.177515	HIS	ICS	9	0.212314					7MT	ASP	3	0.164926	HIS	PPF	8	0.116584	TRP	ACY	2	0.123609	XYG	GLU	3	0.0629855	TYR	G	30	0.0776016	HIS	MP2	2	0.238949	DG	DG	3	0.207469	U	U	7	0.143767	HIS	ACY
G	C	1	0.184162	A	C	3	0.177515	HIS	ACY	9	0.212314					3WL	GLU	3	0.164926	HIS	F	8	0.116584	TRP	ARG	2	0.123609	TRP	HEC	3	0.0629855	HIS	DA	30	0.0776016	7F5	GLU	2	0.238949	ATP	GLU	3	0.207469	G	GLU	6	0.123229	PLP	GLU
58K	AKG	1	0.184162	TRP	ACT	3	0.177515	TRP	PO4	9	0.212314					HIS	CXS	3	0.164926	HIS	K9B	7	0.102011	TYR	S1S	2	0.123609	TRP	CIT	3	0.0629855	NAD	ASP	28	0.0724282	C	MES	2	0.238949	578	GLU	3	0.207469	DC	GLU	6	0.123229	HIS	DT
G	4OC	1	0.184162	HIS	KCX	3	0.177515	A	A	9	0.212314					4NC	GLU	3	0.164926	HIS	3DR	7	0.102011	TYR	SER	2	0.123609	TYR	FLC	3	0.0629855	NDP	GLU	27	0.0698414	THP	ASP	2	0.238949	HIS	MES	3	0.207469	HIC	CL	5	0.10269	PHE	HEC
FMN	ACT	1	0.184162	HIS	NO3	3	0.177515	HIS	G	9	0.212314					SRM	PO4	3	0.164926	HIS	OCS	7	0.102011	U	A	2	0.123609	TYR	MLI	3	0.0629855	TYR	FMT	27	0.0698414	C	U	2	0.238949	B9Z	GLU	2	0.138313	HIS	DAL	5	0.10269	HIS	FLC
FAD	H2S	1	0.184162	TRP	SF3	3	0.177515	TRP	CYN	9	0.212314					HIS	ZZ7	3	0.164926	HIS	VII	7	0.102011	BAB	ASP	2	0.123609	PEB	ASP	3	0.0629855	HIS	ACY	27	0.0698414	HIS	EPE	2	0.238949	HEM	SO4	2	0.138313	PTE	ASP	5	0.10269	NAD	ACT
EDA	ASP	1	0.184162	DC	CL	3	0.177515	HIS	AZI	8	0.188724					SRM	NO2	3	0.164926	HIS	TAR	7	0.102011	TRP	PHE	2	0.123609	TYR	PO4	3	0.0629855	TRP	NAP	27	0.0698414	CHL	GLU	2	0.238949	HIS	CIT	2	0.138313	UGA	ASP	5	0.10269	U	A
DAH	GLU	1	0.184162	U	A	3	0.177515	TYR	CL	8	0.188724					HIS	CFM	3	0.164926	HIS	GDP	7	0.102011	TRP	SER	2	0.123609	HIS	NAP	3	0.0629855	HIS	G	26	0.0672547	HIS	HEC	2	0.238949	DA	GLU	2	0.138313	HIS	OCS	5	0.10269	NAD	ASP
CV3	SIN	1	0.184162	C	A	3	0.177515	HIS	CO3	8	0.188724					HIS	CO2	3	0.164926	HIS	GLY	7	0.102011	TRP	SIN	2	0.123609	PHE	GLY	3	0.0629855	PHE	CL	26	0.0672547	RKL	CL	2	0.238949	CLA	ASP	2	0.138313	HIS	ACY	5	0.10269	HIS	DOR
CQ9	SIN	1	0.184162	PHE	HIS	2	0.118343	HIS	POP	8	0.188724					IMD	GLU	3	0.164926	HIS	ASN	7	0.102011	APR	SO4	2	0.123609	FAD	MTG	3	0.0629855	TYR	ACY	25	0.064668	HLW	GLU	2	0.238949	DC	ASP	2	0.138313	8DG	GLU	5	0.10269	AMQ	GLU
HIS	CIT	1	0.184162	G	PYI	2	0.118343	HIS	DTP	8	0.188724					HIS	AMP	3	0.164926	HIS	ICS	7	0.102011	1JF	GLU	2	0.123609	TRP	PO4	3	0.0629855	C2E	C2E	25	0.064668	E2Z	GLU	2	0.238949	ANP	GLU	2	0.138313	ADP	GLU	5	0.10269	TYR	NO3
CO0	AKG	1	0.184162	PHE	IOD	2	0.118343	HIS	UDP	8	0.188724					HEM	GLU	2	0.109951	HIS	K26	7	0.102011	H3V	GLU	1	0.0618047	PHE	PRO	3	0.0629855	PHE	PO4	24	0.0620813	4E8	GLU	2	0.238949	DC	DC	2	0.138313	TYR	SO4	5	0.10269	NAP	ACT
C	ASP	1	0.184162	00S	ASP	2	0.118343	PHE	CFM	7	0.165133					HIS	BEZ	2	0.109951	HIS	5GP	6	0.0874381	H2Y	GLU	1	0.0618047	KLA	HEM	3	0.0629855	PHE	HEM	24	0.0620813	EG8	GLU	2	0.238949	HIS	ILE	2	0.138313	NAP	ASP	5	0.10269	PHE	NAD
BTM	POP	1	0.184162	PHE	G	2	0.118343	PHE	AKG	7	0.165133					HIS	JQZ	2	0.109951	HIS	67M	6	0.0874381	HIC	GLU	1	0.0618047	IMD	ASP	3	0.0629855	HIS	IOD	24	0.0620813	A	G	2	0.238949	H79	GLU	2	0.138313	8GT	GLU	5	0.10269	FAD	FUM
AWV	SO4	1	0.184162	HIS	1EE	2	0.118343	HIS	FLC	7	0.165133					HIS	3HB	2	0.109951	HIS	TA8	6	0.0874381	H2J	GLU	1	0.0618047	TRP	TLA	3	0.0629855	HIS	GTP	24	0.0620813	9HL	GLU	2	0.238949	HIS	API	2	0.138313	DC	ASP	5	0.10269	HIS	CIT
AMP	PO4	1	0.184162	HIS	2HP	2	0.118343	HIS	SO3	7	0.165133					HIS	ATP	2	0.109951	HIS	BEZ	6	0.0874381	31B	GLU	1	0.0618047	AMZ	ASP	3	0.0629855	TRP	DT	24	0.0620813	G	U	2	0.238949	HEM	IOD	2	0.138313	IMD	CL	4	0.0821524	PHE	AKG
A	U	1	0.184162	HIS	4U7	2	0.118343	HIS	ACP	7	0.165133					HIS	BO3	2	0.109951	HIS	IOD	6	0.0874381	HIS	1CC	1	0.0618047	PHE	A	3	0.0629855	TYR	TPO	23	0.0594946	ADP	GLU	2	0.238949	APC	ASP	2	0.138313	JSD	ASP	4	0.0821524	IMD	GLU
TYR	YXZ	1	0.184162	PHE	AZI	2	0.118343	TYR	SO3	7	0.165133					HIS	AF3	2	0.109951	HIS	GB	6	0.0874381	A	C	1	0.0618047	GYS	GLU	2	0.0419903	HIS	MLI	23	0.0594946	0KX	ASP	2	0.238949	APK	GLU	2	0.138313	HIS	CXA	4	0.0821524	A	A
A	A	1	0.184162	HIS	5XR	2	0.118343	HIS	PC	7	0.165133					HIS	ACY	2	0.109951	HIS	PA5	6	0.0874381	HIS	1JY	1	0.0618047	PHE	GDP	2	0.0419903	TYR	SAH	22	0.0569078	L5Z	GLU	2	0.238949	HIS	PHE	2	0.138313	ATP	GLU	4	0.0821524	TRP	NO3
8R0	AKG	1	0.184162	HIS	CO3	2	0.118343	HIS	G4S	7	0.165133					HIS	A3P	2	0.109951	HIS	QNA	6	0.0874381	2DZ	GLU	1	0.0618047	DG	ASP	2	0.0419903	TYR	CIT	22	0.0569078	DG	DA	2	0.238949	HIS	VAL	2	0.138313	PRH	ASP	4	0.0821524	NAD	OXL
6UW	ASP	1	0.184162	PHE	0JC	2	0.118343	HIS	GLR	7	0.165133					HEM	HEM	2	0.109951	HIS	AF3	6	0.0874381	HIS	A	1	0.0618047	IEY	GLU	2	0.0419903	TYR	HEM	22	0.0569078	PHE	ASP	2	0.238949	HIS	UNL	2	0.138313	PTT	GLU	4	0.0821524	ATP	ASP
CQ9	AKG	1	0.184162	HIS	CIT	2	0.118343	HIS	CFN	6	0.141543					HIS	5OM	2	0.109951	HIS	GG6	6	0.0874381	27X	ASP	1	0.0618047	PHE	HEM	2	0.0419903	HIS	OAA	21	0.0543211	1JF	GLU	2	0.238949	HIS	24G	2	0.138313	G	CL	4	0.0821524	FMN	NIO
TYR	BR	1	0.184162	IMD	ASP	2	0.118343	IMD	BEF	6	0.141543					HIS	ILE	2	0.109951	HIS	GDU	6	0.0874381	H1G	GLU	1	0.0618047	NAD	ASP	2	0.0419903	IMD	ASP	21	0.0543211	HEM	NO2	2	0.238949	HIS	ALA	2	0.138313	HIS	P3S	4	0.0821524	G	G
THH	GLU	1	0.184162	HIS	AMP	2	0.118343	HIS	C	6	0.141543					HIS	ICS	2	0.109951	HIS	CPT	6	0.0874381	HIS	BCN	1	0.0618047	PHE	IOD	2	0.0419903	HIS	PLP	21	0.0543211	F2A	ASP	2	0.238949	HIS	NFQ	2	0.138313	NAD	ASP	4	0.0821524	HEM	SO4
TRP	TLA	1	0.184162	HIS	AUC	2	0.118343	HIS	CDP	6	0.141543					HIS	5ON	2	0.109951	HIS	0ZD	6	0.0874381	24I	ASP	1	0.0618047	PHE	LYS	2	0.0419903	TYR	DTP	21	0.0543211	ISW	HEC	2	0.238949	HIS	NGQ	2	0.138313	HIS	OXD	4	0.0821524	TYR	ACY
TRP	03W	1	0.184162	NAI	HIO	2	0.118343	HIS	GTP	6	0.141543					HIS	DMS	2	0.109951	HIS	A	6	0.0874381	HIS	DA	1	0.0618047	NAP	GLU	2	0.0419903	TYR	NAD	20	0.0517344	PHE	GLU	2	0.238949	HIS	DG	2	0.138313	HIS	EIP	4	0.0821524	TYR	CIT
TRP	FEG	1	0.184162	NAD	HIO	2	0.118343	HIS	AKG	6	0.141543					HEM	IOD	2	0.109951	HIS	G	6	0.0874381	21D	21D	1	0.0618047	A	ASP	2	0.0419903	TYR	PLP	20	0.0517344	XG4	ASP	2	0.238949	HIS	9BZ	2	0.138313	BLO	GLU	4	0.0821524	IMD	ASP
PHE	ATP	1	0.184162	HIS	5AB	2	0.118343	A	U	6	0.141543					HIS	CFN	2	0.109951	HIS	DPS	6	0.0874381	HIS	LMR	1	0.0618047	UDP	ASP	2	0.0419903	HIS	DC	20	0.0517344	NAP	ASP	2	0.238949	ATP	SO4	2	0.138313	BIO	GLU	4	0.0821524	HIS	PXP
TRP	FMT	1	0.184162	MA7	ASP	2	0.118343	TYR	BEF	6	0.141543					HIS	CIT	2	0.109951	IMD	ACT	6	0.0874381	HIS	MLT	1	0.0618047	PHE	OXL	2	0.0419903	TYR	FLC	20	0.0517344	DG	CL	1	0.119474	DG	DC	2	0.138313	UD2	ASP	4	0.0821524	NAP	ASP
TRP	HCT	1	0.184162	PHE	SIN	2	0.118343	HIS	UTP	6	0.141543					HIS	COA	2	0.109951	HIS	Y38	6	0.0874381	HIS	NAP	1	0.0618047	PIA	GLU	2	0.0419903	TYR	ICT	19	0.0491477	DG	DT	1	0.119474	B30	ASP	2	0.138313	TMP	GLU	4	0.0821524	HIS	IHP
TRP	O1N	1	0.184162	TRP	PDC	2	0.118343	PHE	FMT	6	0.141543					HIS	13P	2	0.109951	HIS	SER	6	0.0874381	HIS	NO3	1	0.0618047	FAD	MSF	2	0.0419903	TRP	DA	19	0.0491477	A	A	1	0.119474	HIS	FMT	2	0.138313	C	SO4	4	0.0821524	A	G
PCR	GLU	1	0.184162	HIS	NTM	2	0.118343	PHE	ICS	6	0.141543					HIS	1AA	2	0.109951	HIS	DQY	5	0.0728651	H1Y	GLU	1	0.0618047	FAD	MTD	2	0.0419903	TRP	DG	19	0.0491477	1FZ	ASP	1	0.119474	HIS	TAR	2	0.138313	HIS	DED	4	0.0821524	HIS	TLA
TRP	OXL	1	0.184162	TYR	G	2	0.118343	U	A	6	0.141543					HIS	4MJ	2	0.109951	HIS	8YL	5	0.0728651	G	SO4	1	0.0618047	PHE	U	2	0.0419903	G	U	18	0.046561	DGT	ASP	1	0.119474	4NC	GLU	2	0.138313	BIO	ASP	3	0.0616143	PHE	TLA
NAP	FMT	1	0.184162	TYR	DG	2	0.118343	PHE	AZI	5	0.117952					HEC	SO3	2	0.109951	HIS	B9Z	5	0.0728651	H17	GLU	1	0.0618047	TYR	CIT	2	0.0419903	HIS	OXM	18	0.046561	DRB	ACT	1	0.119474	SB7	GLU	2	0.138313	HEM	ASP	3	0.0616143	COA	GLU
TRP	PQQ	1	0.184162	TYR	CYN	2	0.118343	HIS	ALF	5	0.117952					HIS	2T8	2	0.109951	HIS	PLM	5	0.0728651	HIS	PHT	1	0.0618047	PHE	TAR	2	0.0419903	DG	ASP	18	0.046561	DRU	GLU	1	0.119474	3PZ	ASP	2	0.138313	HIS	922	3	0.0616143	PHE	FAD
TRP	SO4	1	0.184162	TYR	BHZ	2	0.118343	TYR	CXS	5	0.117952					HIS	DTZ	2	0.109951	HIS	OAA	5	0.0728651	A	ASP	1	0.0618047	U	C	2	0.0419903	HIS	SIN	18	0.046561	DT	ASP	1	0.119474	Z93	GLU	2	0.138313	G	ASP	3	0.0616143	FAD	BEZ
TRP	THE	1	0.184162	C	C	2	0.118343	TYR	KCX	5	0.117952					VEA	AZI	2	0.109951	HIS	HCA	5	0.0728651	ANP	GLU	1	0.0618047	PHE	PO4	2	0.0419903	TRP	FMT	17	0.0439742	DZ4	ASP	1	0.119474	PHE	ACY	2	0.138313	FZQ	GLU	3	0.0616143	PHE	CIT
TYR	2KZ	1	0.184162	TYR	BEF	2	0.118343	U	C	5	0.117952					HIS	A	2	0.109951	HIS	LEU	5	0.0728651	A	ARG	1	0.0618047	HIS	ICT	2	0.0419903	HIS	SEP	17	0.0439742	ENG	ASP	1	0.119474	1MK	GLU	2	0.138313	MGD	ASP	3	0.0616143	PHE	ORO
HIS	CTP	1	0.184162	G	A	2	0.118343	TYR	BJ2	5	0.117952					HIS	MMQ	2	0.109951	HIS	NCD	5	0.0728651	AWV	SO4	1	0.0618047	G	U	2	0.0419903	HIS	A	16	0.0413875	FAD	ASP	1	0.119474	VEA	GLU	2	0.138313	HIS	C	3	0.0616143	NAD	PO4
TYR	ACT	1	0.184162	C	U	2	0.118343	TRP	DPF	5	0.117952					G	A	2	0.109951	HIS	DDZ	5	0.0728651	B0V	GLU	1	0.0618047	AMP	GLU	2	0.0419903	PHE	DG	16	0.0413875	FAD	CL	1	0.119474	TYR	AZI	2	0.138313	HIS	GLY	3	0.0616143	THP	ASP
TYR	ACY	1	0.184162	TYR	ACY	2	0.118343	HIS	A12	5	0.117952					CHL	GLU	2	0.109951	HIS	H27	5	0.0728651	BEN	GLU	1	0.0618047	HIS	ZST	2	0.0419903	C	G	16	0.0413875	FAD	MES	1	0.119474	UPF	ASP	2	0.138313	DG	DC	3	0.0616143	HEM	GLU
LDV	SO4	1	0.184162	TYR	999	2	0.118343	HIS	PPV	5	0.117952					IMD	ASP	2	0.109951	HIS	HEM	5	0.0728651	BNL	Q01	1	0.0618047	A	A	2	0.0419903	IMD	GLU	16	0.0413875	FEC	GLU	1	0.119474	DEO	GLU	1	0.0691563	HIS	5CM	3	0.0616143	TYR	SIA
TYR	ADA	1	0.184162	TYR	0O2	2	0.118343	HIS	8DG	5	0.117952					HIS	UNL	2	0.109951	A	C	5	0.0728651	919	GLU	1	0.0618047	HIS	UD1	2	0.0419903	PLP	ASP	15	0.0388008	DG	ACT	1	0.119474	ADP	ASP	1	0.0691563	CTP	ASP	3	0.0616143	C2F	GLU
TYR	BH2	1	0.184162	HIS	NFS	2	0.118343	HIS	5GP	5	0.117952					KC1	KC1	2	0.109951	HIS	D0W	5	0.0728651	5VM	GLU	1	0.0618047	BNI	ASP	2	0.0419903	TYR	F6P	15	0.0388008	3ES	SO4	1	0.119474	2B8	GLU	1	0.0691563	HIS	86A	3	0.0616143	PHE	MES
HIS	S2C	1	0.184162	TRP	SNW	2	0.118343	HIS	TTP	5	0.117952					HIS	U5P	2	0.109951	HIS	033	5	0.0728651	C	G	1	0.0618047	PHE	C	2	0.0419903	PEB	ASP	15	0.0388008	DC	DG	1	0.119474	DG	BRU	1	0.0691563	HIS	API	3	0.0616143	HIS	DG
TYR	BHN	1	0.184162	HIS	MLI	2	0.118343	TYR	EDT	5	0.117952					9RX	ASP	2	0.109951	HIS	HWU	5	0.0728651	C2E	GLU	1	0.0618047	TRP	PDC	2	0.0419903	TYR	3PG	14	0.0362141	G	CL	1	0.119474	1OU	GLU	1	0.0691563	HIS	0X9	3	0.0616143	U	G
HIS	NO2	1	0.184162	TRP	FMT	2	0.118343	PHE	KCX	5	0.117952					HIS	TPO	2	0.109951	HIS	1EC	5	0.0728651	CRK	ACT	1	0.0618047	9SZ	GLU	2	0.0419903	UDP	ASP	14	0.0362141	ADP	ASP	1	0.119474	DG	DA	1	0.0691563	HWU	ASP	3	0.0616143	U	C
HIS	NAP	1	0.184162	TRP	FLC	2	0.118343	PHE	ATP	5	0.117952					HIS	TLA	2	0.109951	HIS	MET	5	0.0728651	CYC	ASP	1	0.0618047	HIS	UD2	2	0.0419903	HIS	SRM	14	0.0362141	9DJ	ASP	1	0.119474	1OT	GLU	1	0.0691563	HSO	GLU	3	0.0616143	HIS	SAH
HIS	MLI	1	0.184162	HIS	HE8	2	0.118343	HIS	DGT	5	0.117952					DG	CL	2	0.109951	HIS	068	5	0.0728651	DT	DC	1	0.0618047	VYA	GLU	2	0.0419903	DC	ASP	14	0.0362141	AIV	GLU	1	0.119474	DCT	ASP	1	0.0691563	AHN	ASP	3	0.0616143	TPV	ASP
TYR	BHZ	1	0.184162	EBP	ASP	2	0.118343	HIS	DA	5	0.117952					DG	DC	2	0.109951	HIS	X7A	5	0.0728651	H0M	GLU	1	0.0618047	TRP	U	2	0.0419903	PHE	ACT	14	0.0362141	ANP	GLU	1	0.119474	DCJ	GLU	1	0.0691563	ANP	ASP	3	0.0616143	NDP	ACT
HIS	EPE	1	0.184162	TRP	DOE	2	0.118343	HIS	DG	5	0.117952					4SX	GLU	2	0.109951	HIS	VI	5	0.0728651	DT	DT	1	0.0618047	TRP	IOD	2	0.0419903	HIS	DTP	14	0.0362141	AR6	ASP	1	0.119474	2C5	HFP	1	0.0691563	HIS	11B	3	0.0616143	NAP	SO4
58D	AKG	1	0.184162	TRP	CIT	2	0.118343	NAP	ASP	5	0.117952					BLM	CL	2	0.109951	HIS	UDH	5	0.0728651	5M8	5M8	1	0.0618047	TRP	I84	2	0.0419903	TYR	DCP	14	0.0362141	8DG	ASP	1	0.119474	2K8	GLU	1	0.0691563	HIS	IOD	3	0.0616143	SHI	GLU
				TRP	AUC	2	0.118343	C	G	5	0.117952					HIS	OK3	2	0.109951	HIS	7BC	4	0.058292	FAD	FOA	1	0.0618047	HIS	DA	2	0.0419903	TRP	IOD	14	0.0362141	ATP	SO4	1	0.119474	2NI	GLU	1	0.0691563	C2E	ASP	3	0.0616143	FAD	ACT
				FAD	MTD	2	0.118343	HIS	GOA	5	0.117952					HEC	NO2	2	0.109951	A	A	4	0.058292	5GP	PO4	1	0.0618047	HIS	DC	2	0.0419903	TYR	ARG	14	0.0362141	AUY	SO4	1	0.119474	2SA	SO4	1	0.0691563	HIS	U	3	0.0616143	NAD	PYR
				HIS	DO3	2	0.118343	NAD	ASP	5	0.117952					HEC	ASP	2	0.109951	HIS	ALF	4	0.058292	FAD	SAR	1	0.0618047	TRP	FMT	2	0.0419903	TYR	U	13	0.0336274	BAB	ASP	1	0.119474	DBH	DBS	1	0.0691563	HIS	343	3	0.0616143	NAD	SO4
				12S	CL	2	0.118343	HIS	DT	4	0.0943619					SRM	NO3	2	0.109951	DRP	DPY	4	0.058292	FLF	GLU	1	0.0618047	HIS	IOD	2	0.0419903	HIS	DGT	13	0.0336274	BES	GLU	1	0.119474	2SK	ASP	1	0.0691563	C	C	3	0.0616143	TYR	AKG
				HIS	WCC	2	0.118343	TRP	SO4	4	0.0943619					HEA	CYN	2	0.109951	HIS	GRE	4	0.058292	G	ASP	1	0.0618047	COA	ASP	2	0.0419903	HIS	ARG	13	0.0336274	BQ4	ASP	1	0.119474	DA	ASP	1	0.0691563	DCF	ASP	3	0.0616143	AMP	FUM
				HIS	HFD	1	0.0591716	TYR	AF3	4	0.0943619					4P9	GLU	1	0.0549753	HIS	ARG	4	0.058292	G	G	1	0.0618047	HIS	FLC	2	0.0419903	TYR	HEC	13	0.0336274	BSV	ASP	1	0.119474	32Q	ASP	1	0.0691563	HIS	MLI	3	0.0616143	TRP	HEM
				HIS	HDQ	1	0.0591716	PHE	ACT	4	0.0943619					AVJ	CL	1	0.0549753	HIS	DA	4	0.058292	A	GLU	1	0.0618047	TYR	MLA	2	0.0419903	PHE	NO3	13	0.0336274	7MT	ASP	1	0.119474	37B	ASP	1	0.0691563	HIS	FUN	3	0.0616143	FMN	PYR
				HIS	C	1	0.0591716	PHE	NLA	4	0.0943619					1WD	ASP	1	0.0549753	HIS	HIW	4	0.058292	478	GLU	1	0.0618047	HIS	GDP	2	0.0419903	U	U	13	0.0336274	DA	GLU	1	0.119474	D7A	HOH	1	0.0691563	HIS	SO3	3	0.0616143	TYR	FMN
				HIS	H2S	1	0.0591716	HIS	TFG	4	0.0943619					1WD	GTP	1	0.0549753	HIS	5RP	4	0.058292	GTP	GLU	1	0.0618047	PHE	DC	2	0.0419903	HIS	POP	13	0.0336274	C	ALA	1	0.119474	1OS	GLU	1	0.0691563	ANP	GLU	3	0.0616143	HIS	6PG
				HIS	FMT	1	0.0591716	PHE	PO4	4	0.0943619					AIV	ASP	1	0.0549753	G	A	4	0.058292	GYC	GLU	1	0.0618047	TYR	DT	2	0.0419903	HIS	C	13	0.0336274	C	ASP	1	0.119474	DT	ASP	1	0.0691563	TV7	ASP	3	0.0616143	TYR	EPE
				HIS	C5P	1	0.0591716	HIS	DCT	4	0.0943619					HIS	4TF	1	0.0549753	HIS	PAE	4	0.058292	H0G	GLU	1	0.0618047	HIS	ITA	1	0.0209952	PHE	A8S	13	0.0336274	6EN	ASP	1	0.119474	DHY	GLU	1	0.0691563	TRP	A	3	0.0616143	IWD	GLU
				HIS	GTF	1	0.0591716	HIS	OGA	4	0.0943619					HIS	92K	1	0.0549753	HIS	M3Q	4	0.058292	Z84	GLU	1	0.0618047	H54	GLU	1	0.0209952	NAP	GLU	13	0.0336274	6ED	ASP	1	0.119474	DPS	GLU	1	0.0691563	6O6	DC	3	0.0616143	GIM	GLU
				HIS	GLY	1	0.0591716	TRP	PD2	4	0.0943619					A	G	1	0.0549753	HIS	BCN	4	0.058292	PHE	ADP	1	0.0618047	HIS	LEU	1	0.0209952	TYR	PHE	13	0.0336274	CHL	LHG	1	0.119474	043	ASP	1	0.0691563	V1P	ASP	3	0.0616143	TRP	MLA
				HIS	G	1	0.0591716	HIS	H2S	4	0.0943619					HIS	5OL	1	0.0549753	UN9	ASP	4	0.058292	HIS	PO4	1	0.0618047	H4G	GLU	1	0.0209952	HIS	OXL	12	0.0310406	5M2	ASP	1	0.119474	FTH	ASP	1	0.0691563	V1S	ASP	3	0.0616143	UBP	GLU
				HIS	FB6	1	0.0591716	HIS	TPS	4	0.0943619					829	ASP	1	0.0549753	HIS	BEF	4	0.058292	TRP	MHI	1	0.0618047	HIS	DWZ	1	0.0209952	ADP	ASP	12	0.0310406	2KA	GLU	1	0.119474	FIN	GLU	1	0.0691563	5GP	GLU	3	0.0616143	NAD	FLC
				HIS	BMH	1	0.0591716	PHE	CFN	4	0.0943619					7MT	SO4	1	0.0549753	HIS	DTZ	4	0.058292	TRP	SRM	1	0.0618047	HIS	ACO	1	0.0209952	TYR	SAM	12	0.0310406	CLA	LHG	1	0.119474	FF2	ASP	1	0.0691563	PHE	LAC	3	0.0616143	TYR	DG
				HIS	DYA	1	0.0591716	HIS	V1S	4	0.0943619					HIS	8YF	1	0.0549753	HIS	PHE	4	0.058292	TRP	SLO	1	0.0618047	H5D	GLU	1	0.0209952	TRP	SAH	12	0.0310406	2GP	GLU	1	0.119474	FEM	ASP	1	0.0691563	5GP	ASP	3	0.0616143	PHE	ADP
				HIS	DG	1	0.0591716	HIS	MDN	4	0.0943619					3TR	GLU	1	0.0549753	HIS	D0Z	4	0.058292	TRP	SFI	1	0.0618047	HIS	A	1	0.0209952	TYR	A	12	0.0310406	1RZ	ASP	1	0.119474	099	ASP	1	0.0691563	XFJ	HEM	3	0.0616143	HIS	BJ2
				HIS	FB5	1	0.0591716	TRP	DA	4	0.0943619					4IR	4IR	1	0.0549753	HIS	BSI	4	0.058292	TRP	OCS	1	0.0618047	HIS	DOY	1	0.0209952	PLP	GLU	12	0.0310406	CRO	CL	1	0.119474	0A1	GLU	1	0.0691563	SV2	ASP	3	0.0616143	TYR	CYC
				G	OLZ	1	0.0591716	HIS	IMO	4	0.0943619					7MT	MLI	1	0.0549753	HIS	8YF	4	0.058292	TRP	NM2	1	0.0618047	HIS	DG	1	0.0209952	TRP	NAD	12	0.0310406	1RY	ASP	1	0.119474	ENZ	GLU	1	0.0691563	V1D	ASP	3	0.0616143	AM1	GLU
				HIS	BEF	1	0.0591716	HIS	3DR	4	0.0943619					7MT	IOD	1	0.0549753	HIS	28P	4	0.058292	TRP	MLI	1	0.0618047	HIS	CYS	1	0.0209952	TRP	EPE	12	0.0310406	YX0	ASP	1	0.119474	ENY	ASP	1	0.0691563	3L4	ASP	3	0.0616143	HIS	U
				6MZ	C	1	0.0591716	TYR	TRP	4	0.0943619					7MT	GLU	1	0.0549753	HIS	3S0	4	0.058292	TRP	GLY	1	0.0618047	HIS	C	1	0.0209952	HIS	MLT	12	0.0310406	HEM	IOD	1	0.119474	0KX	ASP	1	0.0691563	TYR	A	3	0.0616143	HIS	DC
				CTE	CYN	1	0.0591716	TYR	ALF	4	0.0943619					BCL	ASP	1	0.0549753	HIS	XA2	4	0.058292	TRP	TLA	1	0.0618047	HIS	ATH	1	0.0209952	HIS	IPE	12	0.0310406	GKW	ASP	1	0.119474	ELJ	GLU	1	0.0691563	NMN	ASP	3	0.0616143	BWD	GLU
				C	G	1	0.0591716	TYR	LPR	4	0.0943619					HIS	5OO	1	0.0549753	HIS	DPF	4	0.058292	TRP	GLN	1	0.0618047	HIS	ACY	1	0.0209952	TRP	SQD	11	0.0284539	PHE	CL	1	0.119474	EEK	ASP	1	0.0691563	HIS	COH	2	0.0410762	TRP	CIT
				C	ASP	1	0.0591716	G	G	4	0.0943619					HIS	8BR	1	0.0549753	HIS	2T8	4	0.058292	TRP	G6P	1	0.0618047	HIS	GLY	1	0.0209952	TRP	FAD	11	0.0284539	NVI	GLU	1	0.119474	0TN	DG	1	0.0691563	BES	GLU	2	0.0410762	ADP	GLU
				A	U	1	0.0591716	TYR	K26	4	0.0943619					6PC	GLU	1	0.0549753	HIS	SEP	4	0.058292	TRP	FX4	1	0.0618047	HIS	GN1	1	0.0209952	HIS	TP7	11	0.0284539	NTM	GLU	1	0.119474	E68	ASP	1	0.0691563	URC	GLU	2	0.0410762	TRP	TLA
				A	G	1	0.0591716	C	A	4	0.0943619					5LD	GLU	1	0.0549753	HIS	SAL	4	0.058292	TRP	EPR	1	0.0618047	HIS	GSH	1	0.0209952	TYR	PLG	11	0.0284539	NAD	C	1	0.119474	121	GLU	1	0.0691563	HIS	P2S	2	0.0410762	FMN	ACY
				8OA	ASN	1	0.0591716	U	U	4	0.0943619					HIS	8YL	1	0.0549753	HIS	2HE	4	0.058292	TRP	BCT	1	0.0618047	HIS	71V	1	0.0209952	HIS	PLG	11	0.0284539	N9W	GLU	1	0.119474	E37	GLU	1	0.0691563	HIS	7B0	2	0.0410762	FMN	BEZ
				8EY	ASP	1	0.0591716	TYR	XCC	4	0.0943619					752	ASP	1	0.0549753	HIS	NLA	4	0.058292	TRP	ASN	1	0.0618047	H5G	GLU	1	0.0209952	TYR	SIA	11	0.0284539	MVL	GLU	1	0.119474	DZ4	ASP	1	0.0691563	HIS	PAM	2	0.0410762	TYR	SIN
				732	FMT	1	0.0591716	HIS	CTP	3	0.0707714					HIS	3HA	1	0.0549753	HIS	CO2	4	0.058292	TRP	THR	1	0.0618047	HIS	48I	1	0.0209952	PHE	DC	11	0.0284539	MVL	ASP	1	0.119474	DVW	VAL	1	0.0691563	TYR	FMT	2	0.0410762	CNU	ASP
				6MA	ASP	1	0.0591716	PHE	ACY	3	0.0707714					BCL	CXM	1	0.0549753	HIS	KIV	4	0.058292	TRP	TLL	1	0.0618047	HIS	2WB	1	0.0209952	TYR	NAP	11	0.0284539	MSR	CL	1	0.119474	DT	PTR	1	0.0691563	HIS	PSL	2	0.0410762	HIS	MLI
				HIS	B30	1	0.0591716	C	U	3	0.0707714					CLA	CLA	1	0.0549753	HIS	CFN	4	0.058292	TRP	ALA	1	0.0618047	HIS	2W9	1	0.0209952	FAD	ASP	11	0.0284539	MES	GLU	1	0.119474	1FZ	ASP	1	0.0691563	FAD	ASP	2	0.0410762	CLA	GLU
				6MA	AKG	1	0.0591716	HIS	D4T	3	0.0707714					HEC	HOH	1	0.0549753	HIS	A12	4	0.058292	TYR	E8P	1	0.0618047	HIS	H2S	1	0.0209952	PLG	ASP	11	0.0284539	M3Q	M3Q	1	0.119474	DT	DA	1	0.0691563	TYR	CO3	2	0.0410762	FMN	GLU
				627	ASP	1	0.0591716	HIS	ANP	3	0.0707714					HIS	9ON	1	0.0549753	HIS	OK3	4	0.058292	UDP	GLU	1	0.0618047	HIS	2W8	1	0.0209952	TYR	C	11	0.0284539	KDZ	GLU	1	0.119474	D66	GLU	1	0.0691563	RRB	ASP	2	0.0410762	HIS	GLY
				5HC	ASP	1	0.0591716	HIS	D3T	3	0.0707714					HEB	ASP	1	0.0549753	HIS	CHD	3	0.043719	TYR	SCA	1	0.0618047	HIS	1CP	1	0.0209952	HIS	UDP	11	0.0284539	KC1	KC1	1	0.119474	4BR	ASP	1	0.0691563	HIS	73N	2	0.0410762	MHF	GLU
				5FC	ASP	1	0.0591716	TYR	LEU	3	0.0707714					HEA	AZI	1	0.0549753	HIS	NO9	3	0.043719	TYR	PPI	1	0.0618047	HIS	HEM	1	0.0209952	HIS	NO3	11	0.0284539	KC1	CLA	1	0.119474	D5M	GLU	1	0.0691563	HIS	SER	2	0.0410762	PQQ	GLU
				5AD	3PO	1	0.0591716	TYR	FKS	3	0.0707714					GYA	GLU	1	0.0549753	HIS	LYS	3	0.043719	TYR	LP5	1	0.0618047	HIC	GLU	1	0.0209952	G	G	11	0.0284539	K9L	GLU	1	0.119474	8OS	U	1	0.0691563	TRP	PO4	2	0.0410762	SAM	GLU
				40A	DG	1	0.0591716	TRP	ADP	3	0.0707714					GDP	GDP	1	0.0549753	HIS	CTP	3	0.043719	TYR	HEM	1	0.0618047	HIS	HIS	1	0.0209952	G	GLU	11	0.0284539	K0I	PO4	1	0.119474	BP5	GLU	1	0.0691563	DC	DG	2	0.0410762	HIS	SIN
				3DT	ASP	1	0.0591716	HIS	CS2	3	0.0707714					GBF	GLU	1	0.0549753	HIS	PAT	3	0.043719	TYR	FLC	1	0.0618047	HIS	ATP	1	0.0209952	HIS	ADP	11	0.0284539	JM1	GLU	1	0.119474	BIO	GLU	1	0.0691563	5MC	A	2	0.0410762	FWD	GLU
				2PV	ASP	1	0.0591716	TYR	MGF	3	0.0707714					G	U	1	0.0549753	HIS	NKN	3	0.043719	TYR	DC	1	0.0618047	ZNP	GLU	1	0.0209952	TYR	LBV	10	0.0258672	O1N	ASP	1	0.119474	BDL	GLU	1	0.0691563	FQT	ASP	2	0.0410762	C	G
				DC	DPY	1	0.0591716	PHE	NO2	3	0.0707714					FO2	GLU	1	0.0549753	HIS	P9T	3	0.043719	TYR	2BO	1	0.0618047	H4B	HEM	1	0.0209952	TRP	NDP	10	0.0258672	PMB	ASP	1	0.119474	7TP	ASP	1	0.0691563	BEZ	GLU	2	0.0410762	TYR	MES
				DG	CL	1	0.0591716	TYR	GDP	3	0.0707714					HEM	SO3	1	0.0549753	HIS	LPR	3	0.043719	TYR	CXS	1	0.0618047	4XK	GLU	1	0.0209952	PHE	DA	10	0.0258672	I93	ASP	1	0.119474	BAB	ASP	1	0.0691563	U5P	GLU	2	0.0410762	BMQ	ASP
				DG	DC	1	0.0591716	TYR	FPS	3	0.0707714					HHV	ASP	1	0.0549753	HIS	C	3	0.043719	TYR	C	1	0.0618047	AWO	ASP	1	0.0209952	TYR	MLI	10	0.0258672	QHL	DA	1	0.119474	7TQ	ASP	1	0.0691563	HIS	CO3	2	0.0410762	TYR	MLA
				DG	GFN	1	0.0591716	TRP	ACY	3	0.0707714					HIC	CL	1	0.0549753	HIS	C93	3	0.043719	TYR	BUL	1	0.0618047	APC	GLU	1	0.0209952	TRP	HEC	10	0.0258672	X89	PO4	1	0.119474	7TR	ASP	1	0.0691563	HIS	ADP	2	0.0410762	TYR	MLI
				HIS	ATP	1	0.0591716	TRP	AUC	3	0.0707714					ENZ	CIT	1	0.0549753	HIS	DC	3	0.043719	TYR	BR	1	0.0618047	ANP	ASP	1	0.0209952	HH2	ASP	10	0.0258672	VER	GLU	1	0.119474	7WJ	GLU	1	0.0691563	TDJ	ASP	2	0.0410762	PHE	BEZ
				HIS	ADP	1	0.0591716	HIS	V1P	3	0.0707714					HIS	0K7	1	0.0549753	HIS	MLA	3	0.043719	TYR	83Y	1	0.0618047	AGS	ASP	1	0.0209952	TYR	CKP	10	0.0258672	TYR	FMT	1	0.119474	829	GLU	1	0.0691563	TYR	PO4	2	0.0410762	TYR	PLG
				HIS	ACY	1	0.0591716	HIS	DCP	3	0.0707714					DHY	GLU	1	0.0549753	HIS	DT	3	0.043719	TYR	7QA	1	0.0618047	ADP	GLU	1	0.0209952	TYR	IPM	10	0.0258672	TYR	EPE	1	0.119474	8GT	ASP	1	0.0691563	CBP	GLU	2	0.0410762	U	GLU
				HIS	A2P	1	0.0591716	HIS	PI	3	0.0707714					DHE	2NO	1	0.0549753	HIS	KDZ	3	0.043719	TRP	API	1	0.0618047	ACO	ASP	1	0.0209952	HIS	LEU	10	0.0258672	TPU	GLU	1	0.119474	9DJ	ASP	1	0.0691563	HIS	HIS	2	0.0410762	HIS	ACO
				HIS	A	1	0.0591716	HIS	KDG	3	0.0707714					HIS	0RV	1	0.0549753	HIS	PGA	3	0.043719	TRP	AKG	1	0.0618047	A	GLU	1	0.0209952	HIS	TTP	10	0.0258672	TPT	SO4	1	0.119474	ADJ	ASP	1	0.0691563	HIS	BHI	2	0.0410762	PHE	MTE
				HIS	82N	1	0.0591716	HIS	LEU	3	0.0707714					DG	CUL	1	0.0549753	HIS	24F	3	0.043719	HIS	T3D	1	0.0618047	A	C	1	0.0209952	HIS	FMN	10	0.0258672	TLF	GLU	1	0.119474	9FJ	ASP	1	0.0691563	U	ACT	2	0.0410762	NAD	FMT
				HIS	38I	1	0.0591716	HIS	MLI	3	0.0707714					DAH	GLU	1	0.0549753	HIS	URQ	3	0.043719	LDV	SO4	1	0.0618047	919	GLU	1	0.0209952	DGT	ASP	10	0.0258672	THH	GLU	1	0.119474	9NW	ASP	1	0.0691563	HIS	KCX	2	0.0410762	PEB	GLU
				GSB	GLU	1	0.0591716	TYR	V1S	3	0.0707714					D0X	GLU	1	0.0549753	HIS	V28	3	0.043719	PHE	ACY	1	0.0618047	7ZC	GLU	1	0.0209952	TYR	NAI	10	0.0258672	SAM	ASP	1	0.119474	A	5AA	1	0.0691563	HIS	L06	2	0.0410762	HIS	SER
				G	U	1	0.0591716	TYR	V1P	3	0.0707714					HIS	1UC	1	0.0549753	HIS	VAL	3	0.043719	PHE	4ML	1	0.0618047	7S9	HEM	1	0.0209952	U	G	10	0.0258672	S8F	GLU	1	0.119474	APC	GLU	1	0.0691563	HIS	L98	2	0.0410762	TYR	DT
				HIS	IMO	1	0.0591716	TYR	V1D	3	0.0707714					HIS	2BA	1	0.0549753	HIS	K1U	3	0.043719	PHE	3ML	1	0.0618047	691	SO4	1	0.0209952	TYR	COA	10	0.0258672	RU8	GLU	1	0.119474	A	ASP	1	0.0691563	DT	C6G	2	0.0410762	G	CL
				G	LYS	1	0.0591716	HIS	GDP	3	0.0707714					COH	CL	1	0.0549753	HIS	576	3	0.043719	PHE	3FL	1	0.0618047	5SQ	GLU	1	0.0209952	TYR	CO3	10	0.0258672	RKM	CL	1	0.119474	A	GLU	1	0.0691563	U	GLU	2	0.0410762	IRN	GLU
				G	ARG	1	0.0591716	TYR	TV7	3	0.0707714					CLN	CYN	1	0.0549753	HIS	FLX	3	0.043719	NRQ	ACT	1	0.0618047	4XJ	GLU	1	0.0209952	HIS	TAR	10	0.0258672	RFA	GLU	1	0.119474	A4P	ASP	1	0.0691563	HIS	ASN	2	0.0410762	8EY	HEM
				FU2	ASP	1	0.0591716	TYR	TLA	3	0.0707714					HIS	3BY	1	0.0549753	HIS	X8A	3	0.043719	NAP	ASP	1	0.0618047	H47	GLU	1	0.0209952	TRP	C	9	0.0232805	R4A	GLU	1	0.119474	ACP	ASP	1	0.0691563	HIS	TLA	2	0.0410762	FAD	TEO
				FOT	ASP	1	0.0591716	TYR	D0W	3	0.0707714					HEM	ACY	1	0.0549753	HIS	IN7	3	0.043719	L18	PLP	1	0.0618047	4XD	GLU	1	0.0209952	TYR	LYS	9	0.0232805	QMS	GLU	1	0.119474	AIV	ACT	1	0.0691563	4AA	GLU	2	0.0410762	919	GLU
				FAD	GLU	1	0.0591716	HIS	FKS	3	0.0707714					HIS	3PG	1	0.0549753	XFJ	CL	3	0.043719	PHE	AZI	1	0.0618047	4JZ	GLU	1	0.0209952	AT2	GLU	9	0.0232805	IKY	CO3	1	0.119474	ADE	ASP	1	0.0691563	HIS	MES	2	0.0410762	CTP	ASP
				EDA	AKG	1	0.0591716	HIS	SAM	3	0.0707714					HEC	CYN	1	0.0549753	HIS	2K8	3	0.043719	KMA	HEM	1	0.0618047	3Z2	GLU	1	0.0209952	HIS	EPE	9	0.0232805	HM9	HM8	1	0.119474	7ML	GLU	1	0.0691563	S48	ACT	2	0.0410762	HEC	SO3
				DG	LFX	1	0.0591716	HIS	SEP	3	0.0707714					HIS	CUK	1	0.0549753	IMD	BEF	3	0.043719	KLY	HEM	1	0.0618047	3FG	GLU	1	0.0209952	TYR	FAD	9	0.0232805	GTZ	GLU	1	0.119474	7JT	GLU	1	0.0691563	HIS	GLN	2	0.0410762	BMP	ASP
				HIS	ICS	1	0.0591716	HIS	DXG	3	0.0707714					HIS	ACO	1	0.0549753	HIS	5OO	3	0.043719	IMD	ASP	1	0.0618047	3EL	GLU	1	0.0209952	TYR	DG2	9	0.0232805	HIS	9X6	1	0.119474	BR3	ASP	1	0.0691563	HIS	LY0	2	0.0410762	PHE	HIS
				XHP	POP	1	0.0591716	A	G	3	0.0707714					HIS	TMP	1	0.0549753	HIS	1K4	3	0.043719	HIS	YZS	1	0.0618047	2GP	GLU	1	0.0209952	HIS	U	9	0.0232805	HFD	ASP	1	0.119474	7F5	HEM	1	0.0691563	B12	GLU	2	0.0410762	TRP	GLY
				HIS	IOD	1	0.0591716	HIS	DUP	3	0.0707714					HIS	YPT	1	0.0549753	K0I	GLU	3	0.043719	HIS	U	1	0.0618047	21D	21D	1	0.0209952	TYR	EPE	9	0.0232805	HEM	HEM	1	0.119474	D1Y	ASP	1	0.0691563	IMU	ASP	2	0.0410762	A3D	OXL
				TRP	DOF	1	0.0591716	HIS	DPO	3	0.0707714					HIS	YI6	1	0.0549753	HIS	0WO	3	0.043719	HIS	TLA	1	0.0618047	1F1	ASP	1	0.0209952	HIS	MLA	9	0.0232805	HEM	ACY	1	0.119474	CRO	CL	1	0.0691563	HIS	33Z	2	0.0410762	QUK	QVE
				TYR	7MT	1	0.0591716	HIS	V1D	3	0.0707714					HIS	XI7	1	0.0549753	HIS	077	3	0.043719	UTP	ASP	1	0.0618047	1A2	ASP	1	0.0209952	HIS	MES	9	0.0232805	HEJ	ASP	1	0.119474	4EY	SO3	1	0.0691563	JMQ	ASP	2	0.0410762	TRP	ASN
				TYR	2KZ	1	0.0591716	TRP	GB	3	0.0707714					HIS	VPD	1	0.0549753	G	U	3	0.043719	PHE	CIR	1	0.0618047	147	GLU	1	0.0209952	HIS	LYS	9	0.0232805	HEC	PRO	1	0.119474	CLA	KC1	1	0.0691563	0N8	GLU	2	0.0410762	A	ASP
				TRP	SIN	1	0.0591716	HIS	TV7	3	0.0707714					HIS	V1D	1	0.0549753	HIS	GLV	3	0.043719	TRP	7PR	1	0.0618047	13A	ASP	1	0.0209952	TRP	UDP	9	0.0232805	HEC	HEC	1	0.119474	4QP	GLU	1	0.0691563	MSS	ASP	2	0.0410762	TYR	6PG
				TRP	RU0	1	0.0591716	HIS	6DK	3	0.0707714					HIS	URP	1	0.0549753	ATP	ASP	3	0.043719	PHE	SER	1	0.0618047	0YH	GLU	1	0.0209952	HIS	LLP	9	0.0232805	HEC	FMT	1	0.119474	4TL	GLU	1	0.0691563	MBY	ASP	2	0.0410762	DA	ASP
				TRP	MED	1	0.0591716	HIS	AD9	3	0.0707714					HIS	UDP	1	0.0549753	AHN	ASP	3	0.043719	TRP	6NA	1	0.0618047	0R6	DDG	1	0.0209952	PT1	ASP	9	0.0232805	HEC	ASP	1	0.119474	4YZ	ASP	1	0.0691563	GDP	ASP	2	0.0410762	746	ASP
				TRP	HGI	1	0.0591716	TYR	6DK	3	0.0707714					HIS	TV7	1	0.0549753	3PZ	ASP	3	0.043719	ST5	ASP	1	0.0618047	AWV	SO4	1	0.0209952	NMN	ASP	8	0.0206938	HB1	GLU	1	0.119474	4Z1	ASP	1	0.0691563	MBO	GLU	2	0.0410762	CQG	GLU
				TRP	FS2	1	0.0591716	HIS	3PO	3	0.0707714					HIS	TV1	1	0.0549753	1BN	ASP	3	0.043719	SHN	ASP	1	0.0618047	B37	GLU	1	0.0209952	TYR	MYR	8	0.0206938	H79	GLU	1	0.119474	5ER	ASP	1	0.0691563	IMQ	ASP	2	0.0410762	AT1	GLU
				TRP	FAD	1	0.0591716	TYR	BHZ	3	0.0707714					HIS	TFG	1	0.0549753	HIS	UPG	3	0.043719	RAI	ASP	1	0.0618047	BAP	GLU	1	0.0209952	TYR	LEU	8	0.0206938	H61	ASP	1	0.119474	C0W	ASP	1	0.0691563	IMP	ASP	2	0.0410762	PHE	POP
				TRP	EDT	1	0.0591716	TRP	OGA	3	0.0707714					HZT	ASP	1	0.0549753	HIS	K2U	3	0.043719	PHE	U	1	0.0618047	BNI	FMT	1	0.0209952	TYR	NO3	8	0.0206938	GZV	ASP	1	0.119474	C0V	ASP	1	0.0691563	GY6	GLU	2	0.0410762	TSV	ASP
				TRP	DA	1	0.0591716	TRP	RHE	3	0.0707714					HIS	TBR	1	0.0549753	HIS	60M	3	0.043719	PHE	SSN	1	0.0618047	H3A	GLU	1	0.0209952	TYR	BCT	8	0.0206938	GXG	ASP	1	0.119474	C	U	1	0.0691563	L4D	ACT	2	0.0410762	BLA	ASP
				HIS	M3P	1	0.0591716	TYR	1KM	3	0.0707714					HIS	SLB	1	0.0549753	HIS	9ON	3	0.043719	PHE	PRO	1	0.0618047	H2D	GLU	1	0.0209952	HIS	PDC	8	0.0206938	GXD	ASP	1	0.119474	5XT	GLU	1	0.0691563	NTM	CL	2	0.0410762	RX8	ASP
				TRP	CYN	1	0.0591716	TYR	AZI	3	0.0707714					HIS	SL6	1	0.0549753	HIS	PLU	3	0.043719	PHE	DIF	1	0.0618047	H1J	GLU	1	0.0209952	XHP	ASP	8	0.0206938	GVR	FMT	1	0.119474	C	G	1	0.0691563	141	GLU	2	0.0410762	TRP	SER
				SIB	ASP	1	0.0591716	TYR	7BC	3	0.0707714					HIS	SIN	1	0.0549753	HIS	PNK	3	0.043719	PHE	OXL	1	0.0618047	H0P	GLU	1	0.0209952	HIS	NAP	8	0.0206938	HIS	8XW	1	0.119474	6JT	GLU	1	0.0691563	PHE	CIT	2	0.0410762	PHE	GLY
				PUR	GLU	1	0.0591716	HIS	TMP	2	0.0471809					HIS	S8A	1	0.0549753	HIS	E3P	3	0.043719	PHE	MET	1	0.0618047	GTP	ACT	1	0.0209952	AR6	ASP	8	0.0206938	HIS	ALA	1	0.119474	C	ASP	1	0.0691563	PHE	PO4	2	0.0410762	TRP	FLC
				PIY	SO4	1	0.0591716	AMP	ASP	2	0.0471809					HIS	RBN	1	0.0549753	HIS	E5N	3	0.043719	PHE	HCV	1	0.0618047	GD9	ASP	1	0.0209952	TRP	FLC	8	0.0206938	HM7	HM8	1	0.119474	727	GLU	1	0.0691563	MVL	ASP	2	0.0410762	TYR	ALA
				PHE	TLA	1	0.0591716	HIS	TPO	2	0.0471809					HIS	Q03	1	0.0549753	HIS	TYR	3	0.043719	PHE	GSH	1	0.0618047	G	ASP	1	0.0209952	TYR	6PG	8	0.0206938	HIS	ARG	1	0.119474	BY6	CL	1	0.0691563	ANP	ACT	2	0.0410762	NAD	CIT
				PHE	RHE	1	0.0591716	HIS	DUD	2	0.0471809					HIS	Q02	1	0.0549753	HIS	S0H	3	0.043719	PHE	GLY	1	0.0618047	FAD	FOA	1	0.0209952	TYR	DGT	8	0.0206938	HIS	UNL	1	0.119474	BWU	ASP	1	0.0691563	MVL	GLU	2	0.0410762	FMN	FMT
				PHE	POP	1	0.0591716	TYR	OXL	2	0.0471809					HIS	PLU	1	0.0549753	HIS	S2C	3	0.043719	PHE	DT	1	0.0618047	FAD	BEZ	1	0.0209952	HIS	PLS	8	0.0206938	HIS	PRO	1	0.119474	BVS	ASP	1	0.0691563	VAO	GLU	2	0.0410762	NAP	ICT
				PHE	PHE	1	0.0591716	TYR	PHE	2	0.0471809					HKL	NO2	1	0.0549753	HIS	ENL	3	0.043719	04A	GLU	1	0.0618047	HIS	MES	1	0.0209952	A	A	8	0.0206938	HIS	NO2	1	0.119474	BTJ	GLU	1	0.0691563	HIS	ZNH	2	0.0410762	FMN	HZZ
				PHE	P60	1	0.0591716	TYR	PHD	2	0.0471809					I96	ASP	1	0.0549753	HIS	DEO	3	0.043719					FAD	6PC	1	0.0209952	CTP	ASP	8	0.0206938	HIS	NFQ	1	0.119474	ZSP	GLU	1	0.0691563	L69	GLU	2	0.0410762	NAP	ACY
				TYR	ATP	1	0.0591716	HIS	TTN	2	0.0471809					HIS	AKR	1	0.0549753	HIS	6MR	3	0.043719					F0Z	ASP	1	0.0209952	PMM	ASP	8	0.0206938	HIS	MLA	1	0.119474	HIS	7QD	1	0.0691563	HH2	ASP	2	0.0410762	G	C
				TYR	AUC	1	0.0591716	TYR	PBE	2	0.0471809					S77	GLU	1	0.0549753	HIS	THR	3	0.043719					EJW	ASP	1	0.0209952	TYR	ATP	8	0.0206938	HIS	M5P	1	0.119474	GNP	GLU	1	0.0691563	A	C	2	0.0410762	PHE	FLC
				TYR	BHN	1	0.0591716	HIS	TYD	2	0.0471809					U13	GLU	1	0.0549753	HIS	67F	3	0.043719					DYG	GLU	1	0.0209952	TRP	NO3	8	0.0206938	HIS	HJ7	1	0.119474	NAP	ASP	1	0.0691563	NX6	GLU	2	0.0410762	NAD	GLU
				TYR	BR	1	0.0591716	TYR	PPF	2	0.0471809					U12	GLU	1	0.0549753	HIS	642	3	0.043719					DG7	GLU	1	0.0209952	HIS	GLR	8	0.0206938	HIS	HCA	1	0.119474	R6A	GLU	1	0.0691563	NEP	GLU	2	0.0410762	TYR	PGU
				URF	ASP	1	0.0591716	HIS	U	2	0.0471809					TYR	OXL	1	0.0549753	HIS	E37	2	0.029146					DG	DC	1	0.0209952	C	ASP	8	0.0206938	HIS	FUN	1	0.119474	R5A	GLU	1	0.0691563	MCF	ASP	2	0.0410762	TYR	PLS
				U31	ASP	1	0.0591716	TRP	L69	2	0.0471809					TYR	CO3	1	0.0549753	HIS	E1C	2	0.029146					CYC	GLU	1	0.0209952	TYR	SIN	8	0.0206938	HIS	BY0	1	0.119474	R47	GLU	1	0.0691563	DG	DT	1	0.0205381	NAP	SUZ
				U	C	1	0.0591716	HIS	UGA	2	0.0471809					T03	GLU	1	0.0549753	HIS	FIX	2	0.029146					CYC	ASP	1	0.0209952	PHE	MES	8	0.0206938	HIS	BO3	1	0.119474	PZ3	ASP	1	0.0691563	283	GLU	1	0.0205381	NAD	AZI
				TYR	YXX	1	0.0591716	TYR	MUC	2	0.0471809					T03	ASP	1	0.0549753	HIS	HB8	2	0.029146					CRR	GLU	1	0.0209952	TYR	PRO	8	0.0206938	HIS	BHU	1	0.119474	PP9	ACY	1	0.0691563	DG	CL	1	0.0205381	TYR	VAL
				TYR	U	1	0.0591716	TYR	LYS	2	0.0471809					SRM	CYN	1	0.0549753	HIS	H9E	2	0.029146					CRO	GLU	1	0.0209952	TRP	CIT	8	0.0206938	HIS	BDH	1	0.119474	PIM	MLA	1	0.0691563	FYO	GLU	1	0.0205381	TZG	GLU
				TYR	TPP	1	0.0591716	PHE	ADP	2	0.0471809					SRM	CL	1	0.0549753	HIS	GTV	2	0.029146					CRK	GLU	1	0.0209952	TRP	HIS	7	0.018107	HIS	BCN	1	0.119474	PHE	CIT	1	0.0691563	2BA	GLU	1	0.0205381	HIS	UNL
				TYR	TLA	1	0.0591716	TYR	MET	2	0.0471809					SNF	ASP	1	0.0549753	HIS	E1S	2	0.029146					CR7	GLU	1	0.0209952	TRP	GDU	7	0.018107	HIS	AZI	1	0.119474	PH0	GLU	1	0.0691563	2GP	GLU	1	0.0205381	HIS	SAM
				TYR	PC	1	0.0591716	C	GLN	2	0.0471809					RU7	RU7	1	0.0549753	HIS	DG	2	0.029146					CKL	ASP	1	0.0209952	TRP	SAM	7	0.018107	040	ASP	1	0.119474	OK3	ASP	1	0.0691563	GDE	GLU	1	0.0205381	HIS	EPE
				TYR	OL5	1	0.0591716	PHE	8P8	2	0.0471809					KU7	GLU	1	0.0549753	HIS	GTQ	2	0.029146					CFY	GLU	1	0.0209952	PHE	C	7	0.018107					OJ4	GLU	1	0.0691563	DCT	ASP	1	0.0205381	HIS	FOT
				TYR	OL3	1	0.0591716	TYR	MLI	2	0.0471809					RU7	ASP	1	0.0549753	HIS	DPP	2	0.029146					C2E	GLU	1	0.0209952	TYR	4IP	7	0.018107					NU7	ASP	1	0.0691563	2K8	ASP	1	0.0205381	HIS	NCD
				TYR	OAA	1	0.0591716	TYR	MYR	2	0.0471809					PD2	ASP	1	0.0549753	HIS	DGL	2	0.029146					C	U	1	0.0209952	HIS	3PG	7	0.018107					NTM	GLU	1	0.0691563	0C	0G	1	0.0205381	FMN	EPS
				TYR	KCX	1	0.0591716	TYR	QTT	2	0.0471809					OOH	GLU	1	0.0549753	HIS	EAL	2	0.029146					C	A	1	0.0209952	A	ASP	7	0.018107					NK5	ASP	1	0.0691563	GDP	GDP	1	0.0205381	NAI	LMR
				TYR	ICZ	1	0.0591716	HIS	DDZ	2	0.0471809					OHI	ASP	1	0.0549753	HIS	EEG	2	0.029146					HIS	LYS	1	0.0209952	PLS	ASP	7	0.018107					NAP	ID8	1	0.0691563	GIM	ASP	1	0.0205381	PHE	ATP
				TYR	ICG	1	0.0591716	HIS	6PG	2	0.0471809					NTM	ASP	1	0.0549753	HIS	FIN	2	0.029146					LFP	GLU	1	0.0209952	PHE	SAH	7	0.018107					NAI	ASP	1	0.0691563	2K8	GLU	1	0.0205381	TYR	DC
				TYR	ICE	1	0.0591716	IMD	GLU	2	0.0471809					NNO	CYN	1	0.0549753	HIS	FC6	2	0.029146					HIS	MGD	1	0.0209952	TYR	GDX	7	0.018107					GQW	ASP	1	0.0691563	2KA	PRO	1	0.0205381	FAD	PYC
				TYR	HCT	1	0.0591716	TRP	KCX	2	0.0471809					MY7	CIT	1	0.0549753	HIS	E4T	2	0.029146					ST1	ASP	1	0.0209952	TYR	GDP	7	0.018107					NAD	GLU	1	0.0691563	DC	DT	1	0.0205381	PHE	DT
				TYR	EOT	1	0.0591716	IMD	ASP	2	0.0471809					MNH	CL	1	0.0549753	HIS	FUJ	2	0.029146					TYR	ACY	1	0.0209952	G	ASP	7	0.018107					NAD	ASP	1	0.0691563	GK8	GLU	1	0.0205381	PHE	DND
				TYR	CPT	1	0.0591716	B3U	SO4	2	0.0471809					LXA	GLU	1	0.0549753	HIS	DCM	2	0.029146					TYR	83Y	1	0.0209952	TYR	LLP	7	0.018107					N9W	GLU	1	0.0691563	30O	GLU	1	0.0205381	PHE	CO3
				TYR	CIT	1	0.0591716	HIS	60M	2	0.0471809					HIS	PAE	1	0.0549753	HIS	0QI	2	0.029146					TYR	2CG	1	0.0209952	HIS	GPJ	7	0.018107					MBY	GLU	1	0.0691563	GB7	ASP	1	0.0205381	NAP	TLA
				PHE	OAA	1	0.0591716	HIS	EDA	2	0.0471809					HIS	P9T	1	0.0549753	HIS	4U7	2	0.029146					TYD	ASP	1	0.0209952	HIS	DCP	7	0.018107					MBO	GLU	1	0.0691563	G46	ASP	1	0.0205381	HIS	AMP
				PHE	LMR	1	0.0591716	HIS	5OM	2	0.0471809					HIS	OXL	1	0.0549753	HIS	3S3	2	0.029146					TRP	TDA	1	0.0209952	TYR	PLS	7	0.018107					LZ0	ASP	1	0.0691563	GAV	GLU	1	0.0205381	HIS	ALA
				PHE	LIZ	1	0.0591716	5AD	3PO	2	0.0471809					HIS	DA	1	0.0549753	HIS	3R9	2	0.029146					TRP	TAR	1	0.0209952	HIS	CYN	7	0.018107					LUW	FMT	1	0.0691563	1MZ	HEM	1	0.0205381	HIS	ADP
				M4R	ASP	1	0.0591716	TYR	7ML	2	0.0471809					HIS	GLN	1	0.0549753	HIS	3FB	2	0.029146					TRP	SUZ	1	0.0209952	HIS	TPO	7	0.018107					LKS	ASP	1	0.0691563	FZK	GLU	1	0.0205381	PHE	KCX
				IGA	ASP	1	0.0591716	HIS	GLY	2	0.0471809					HIS	GDP	1	0.0549753	HIS	37E	2	0.029146					TRP	SER	1	0.0209952	TYR	POP	7	0.018107					LA3	ASP	1	0.0691563	FTH	ASP	1	0.0205381	TRP	074
				HYN	ASP	1	0.0591716	HIS	NX6	2	0.0471809					HIS	G1K	1	0.0549753	HIS	2X0	2	0.029146					TRP	PO3	1	0.0209952	HIS	PRO	7	0.018107					K3U	GLU	1	0.0691563	G	6MZ	1	0.0205381	HEM	SO3
				XFN	CL	1	0.0591716	HIS	NLP	2	0.0471809					HIS	FZZ	1	0.0549753	HIS	1UC	2	0.029146					TRP	OCS	1	0.0209952	HIS	PHE	7	0.018107					J4V	GLU	1	0.0691563	FGN	ASP	1	0.0205381	HIC	ASP
[truncated: 1,663 more rows]
[truncated: 46 more columns]
